# Supplementary material for: Delayed bystander CD8 T cell activation, early immune pathology and persistent dysregulation characterise severe COVID-19
Source: bioRxiv or medRxiv preprint supplement (doi:10.1101/2021.01.11.20248765), 2021-03-26

Item S2: Cell data – absolute counts

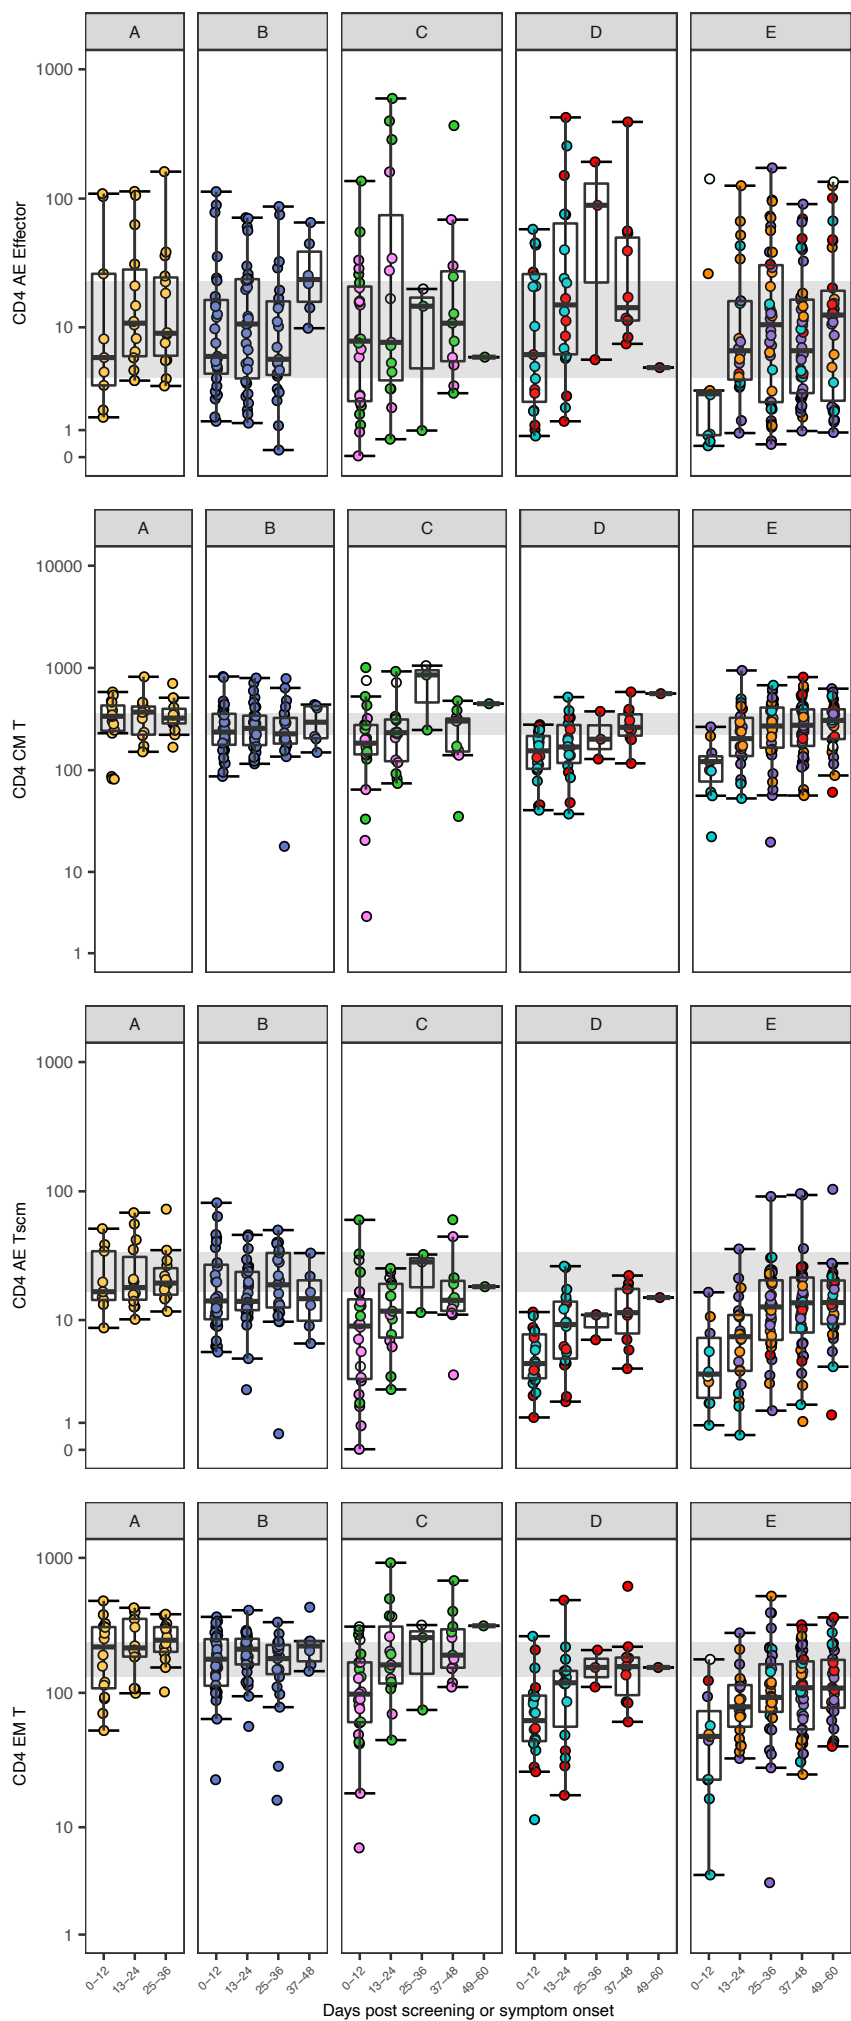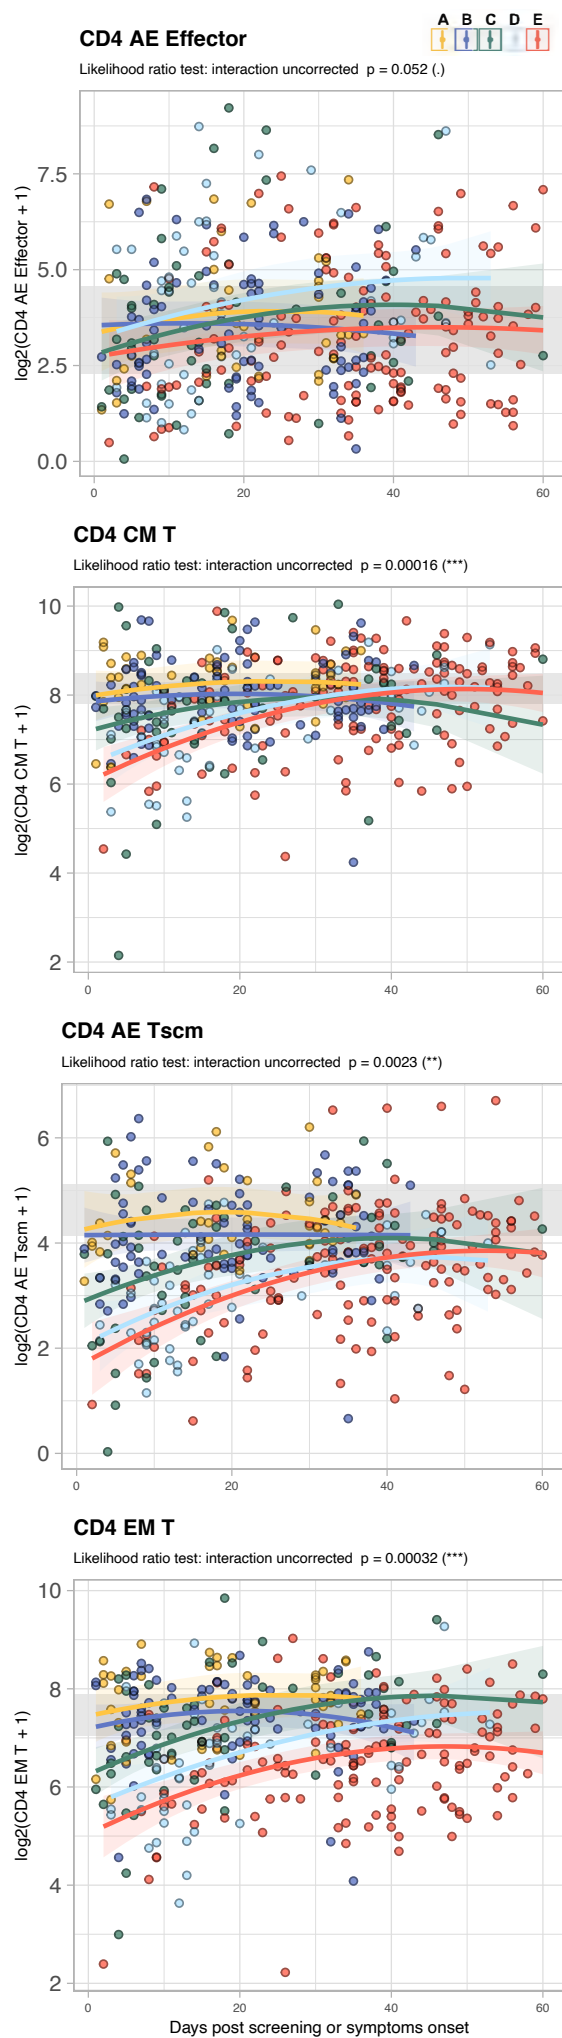

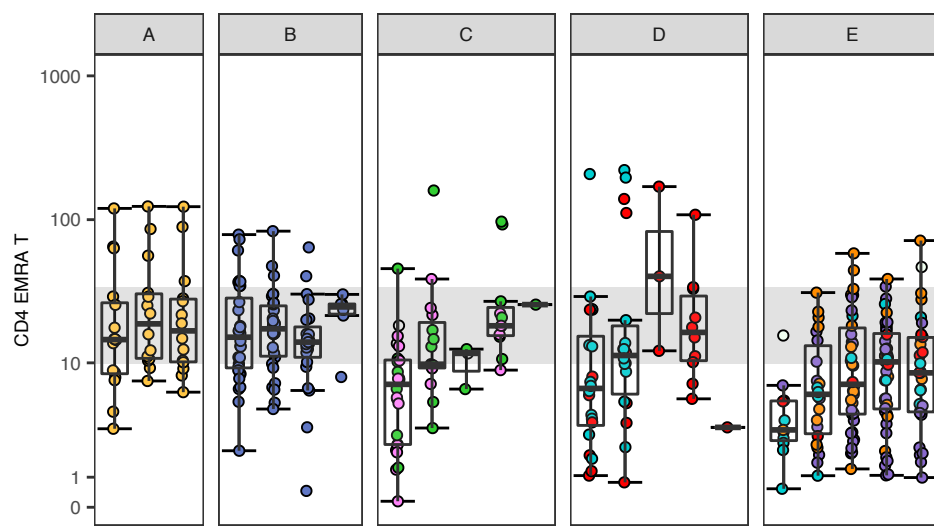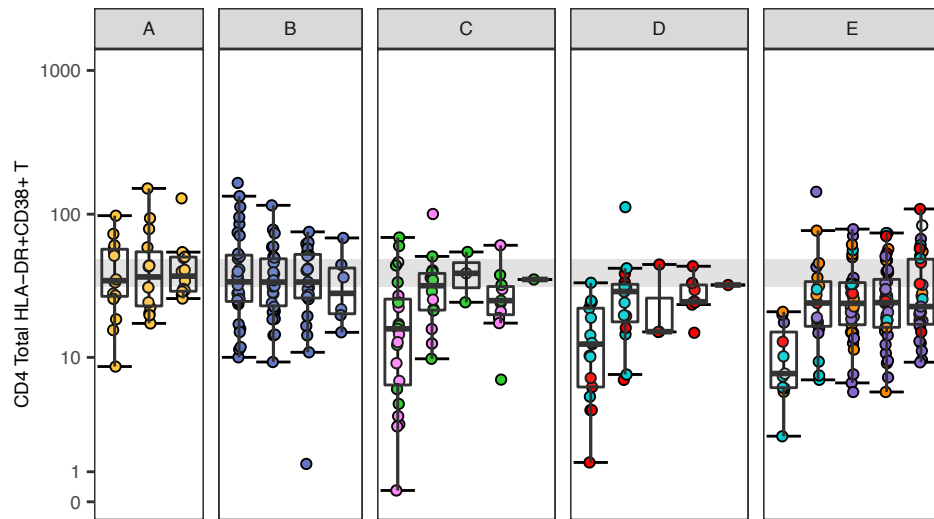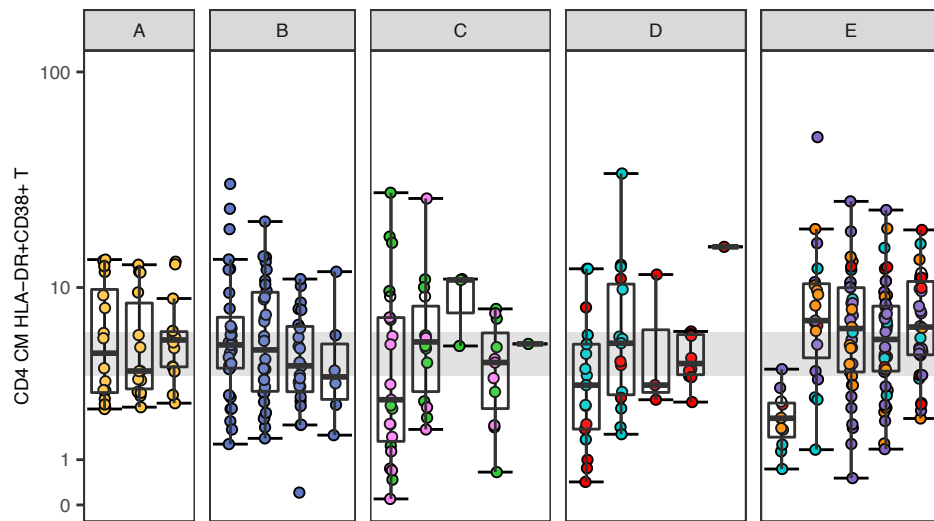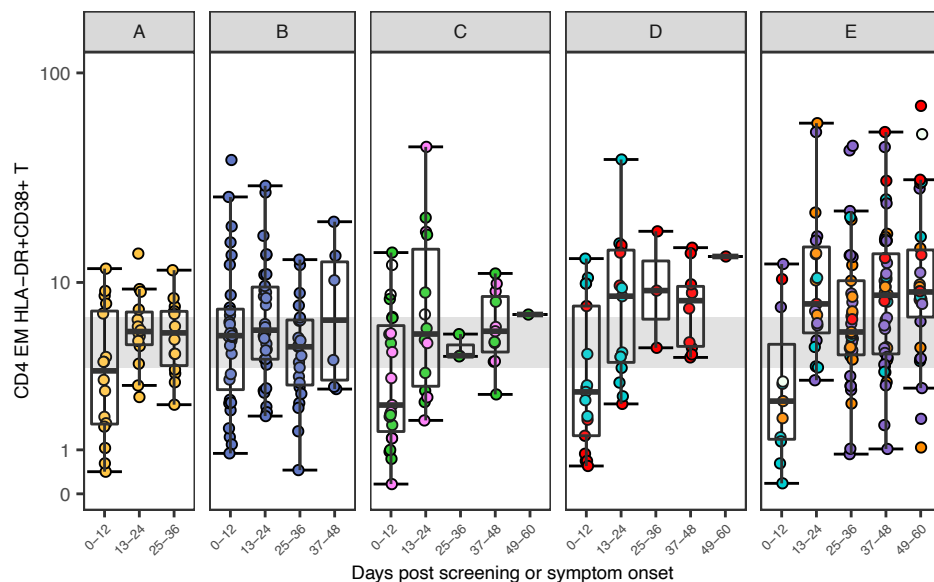

## CD4 EMRA T

Likelihood ratio test: interaction uncorrected  $p = 0.00047$  (\*\*\*)

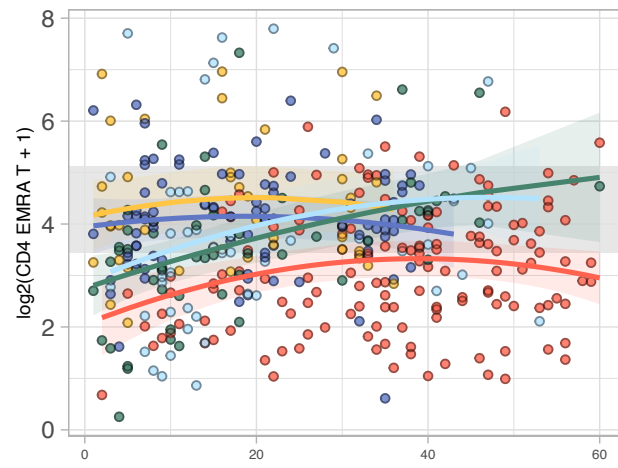

## CD4 Total HLA-DR+CD38+ T

Likelihood ratio test: interaction uncorrected  $p = 0.001$  (\*\*)

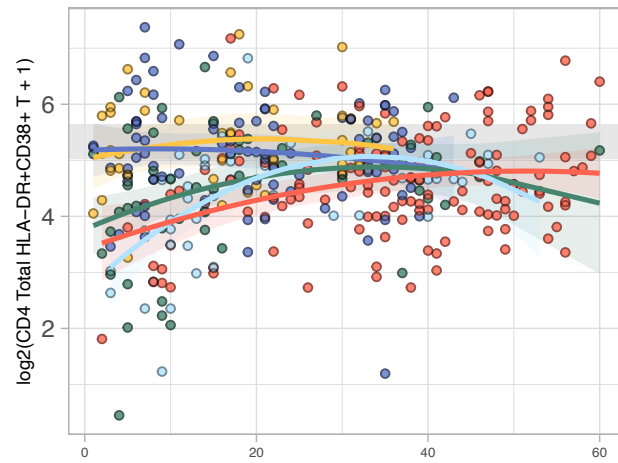

## CD4 CM HLA-DR+CD38+ T

Likelihood ratio test: interaction uncorrected  $p = 0.0027$  (\*\*)

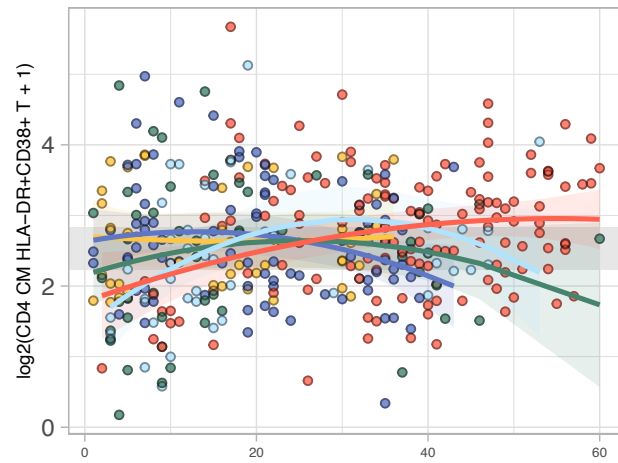

## CD4 EM HLA-DR+CD38+ T

Likelihood ratio test: interaction uncorrected  $p = 0.002$  (\*\*)

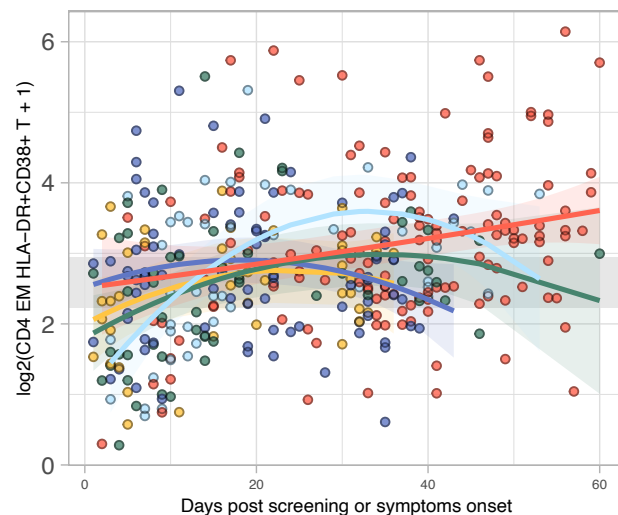

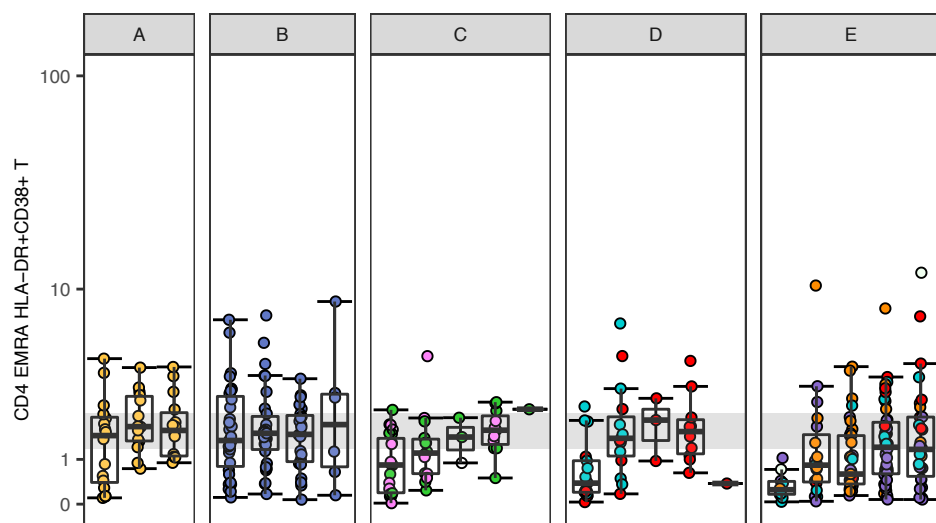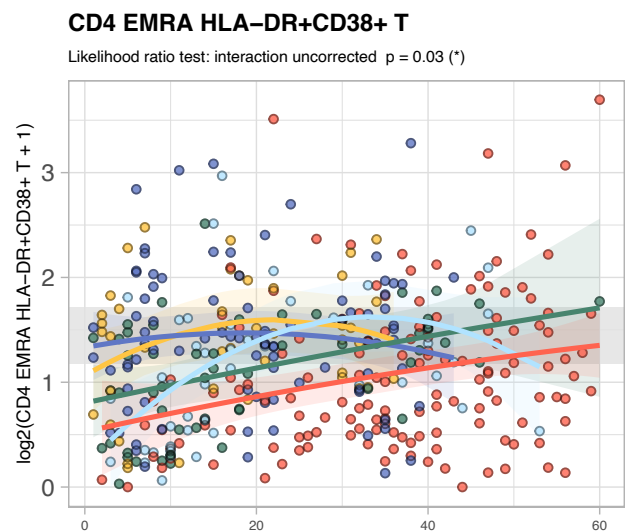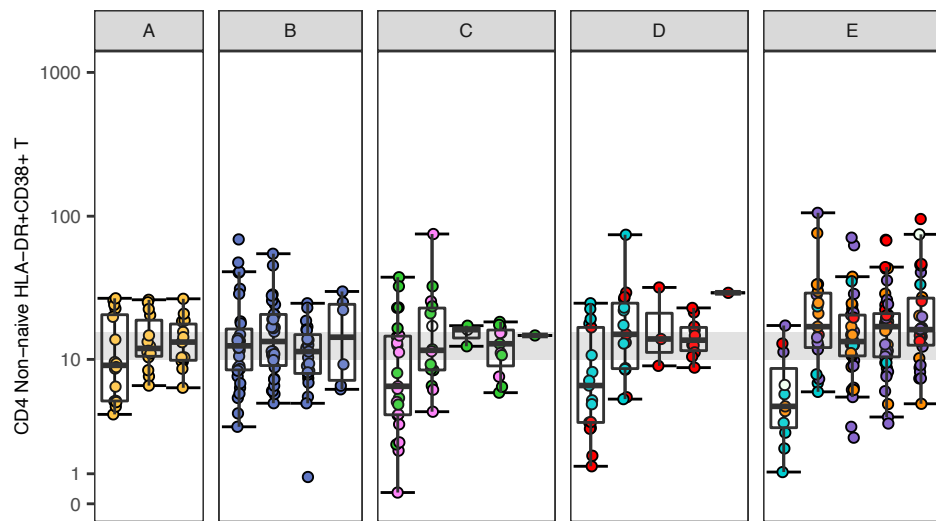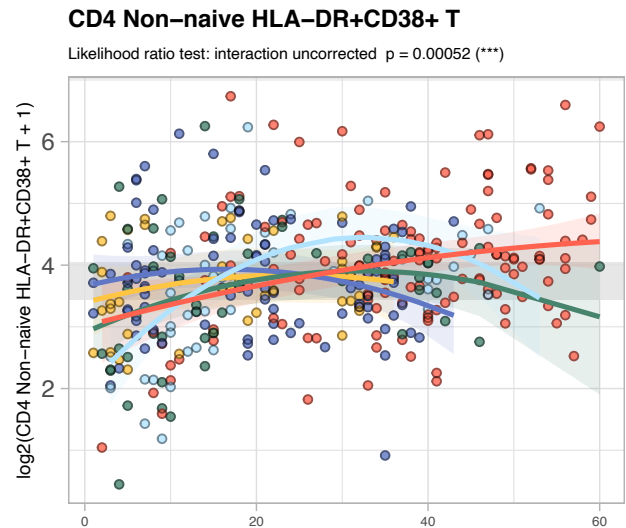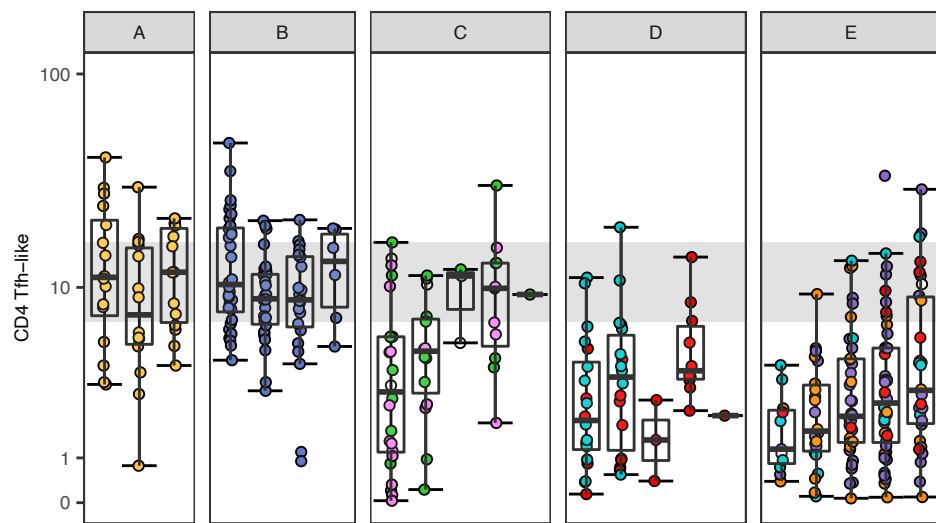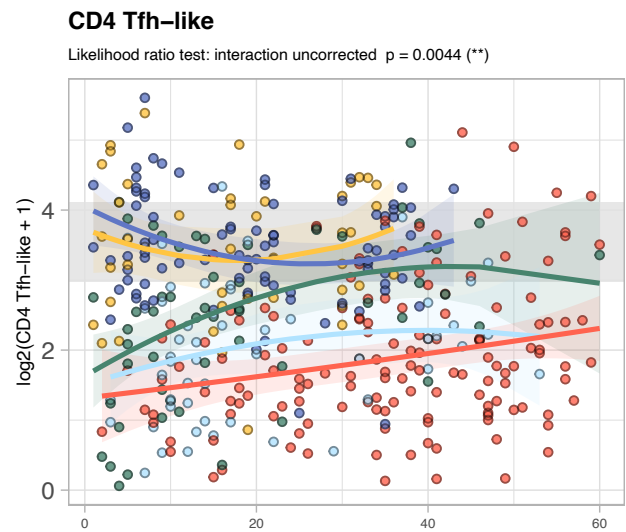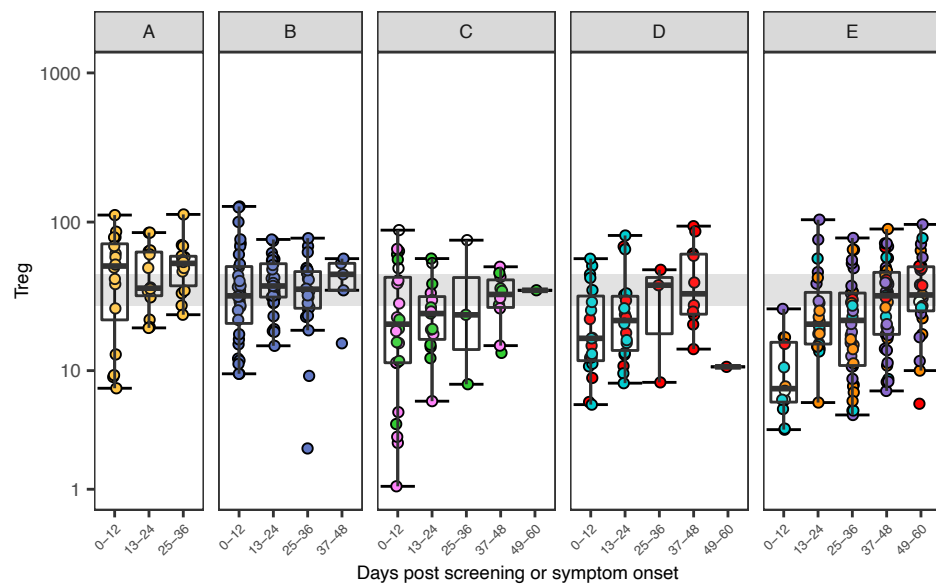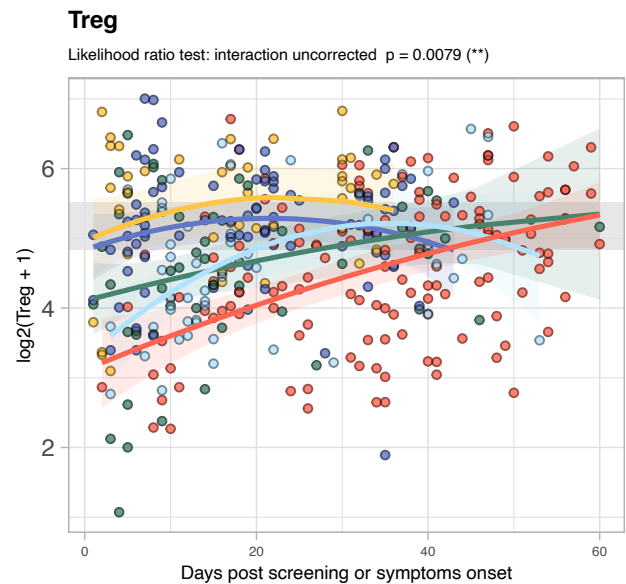

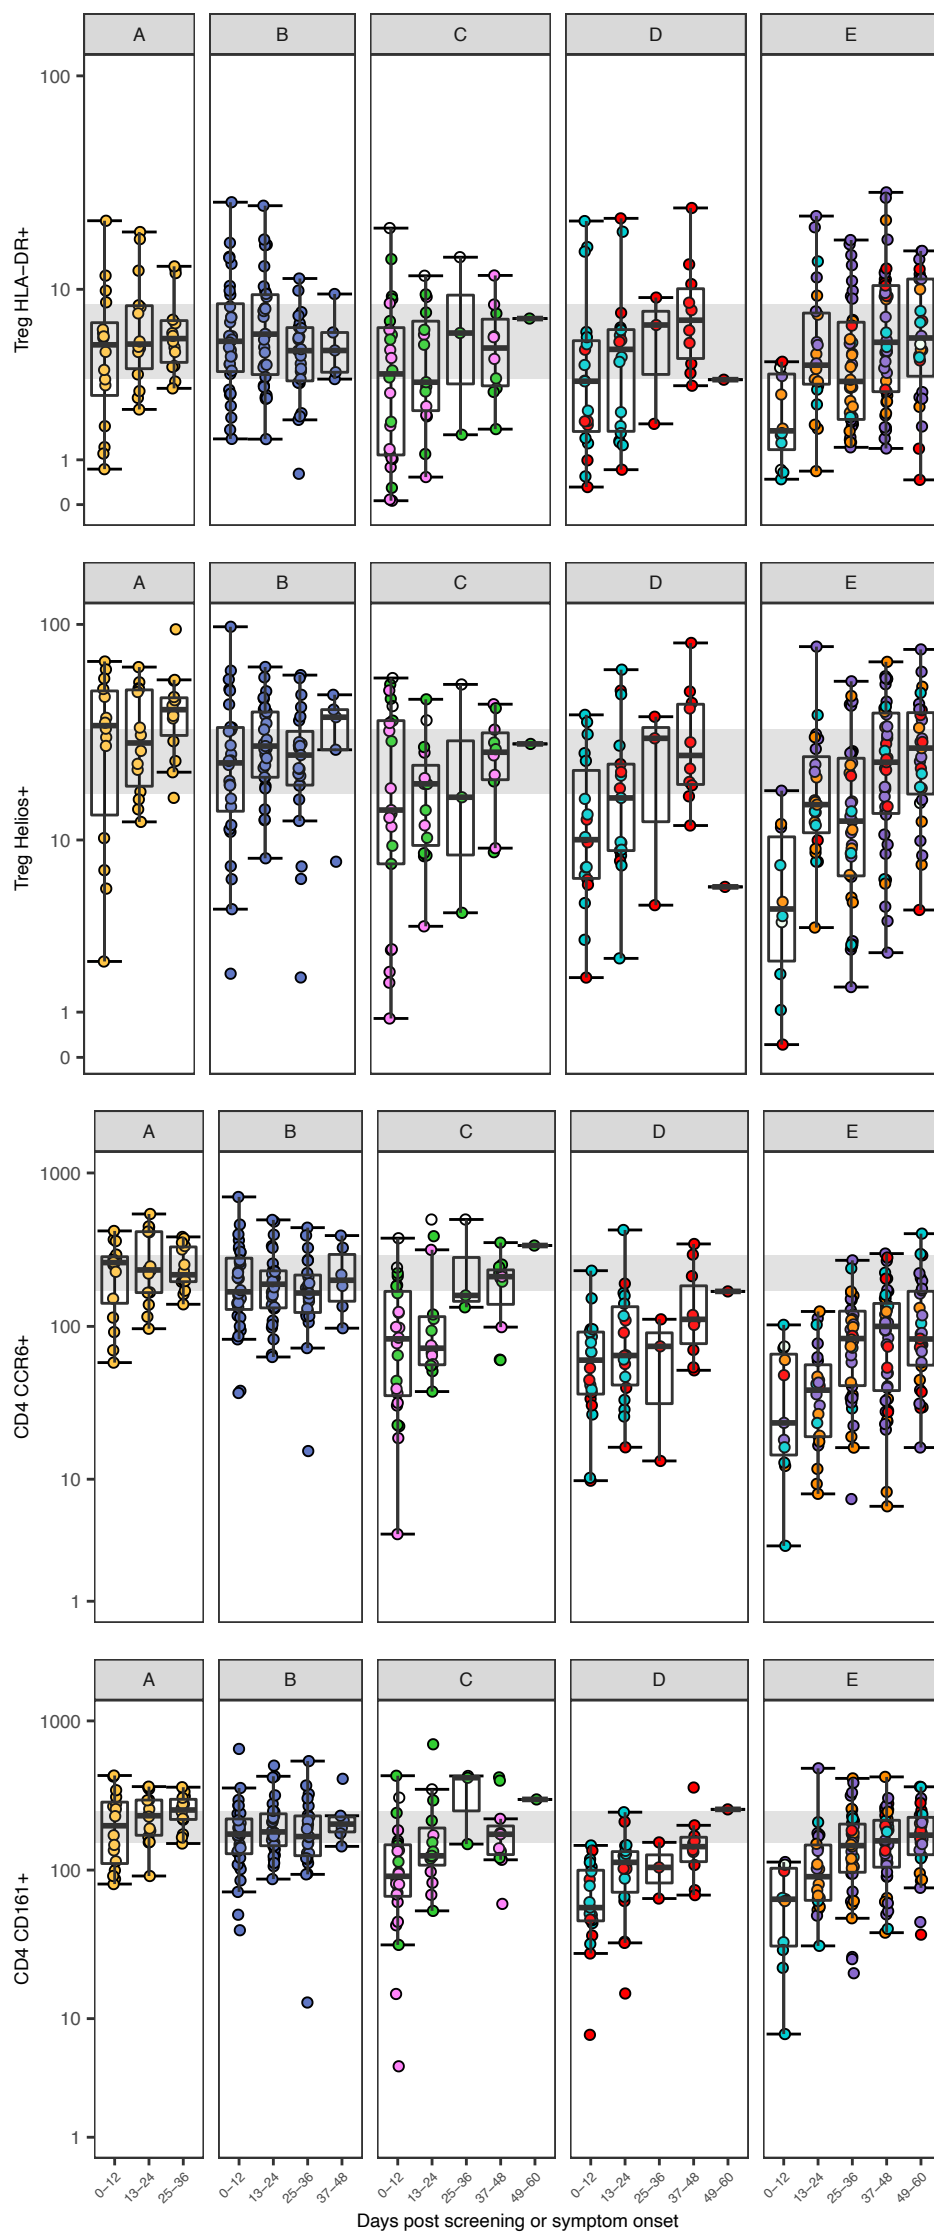

### Treg HLA-DR+

Likelihood ratio test: interaction uncorrected  $p = 0.0011$  (\*\*)

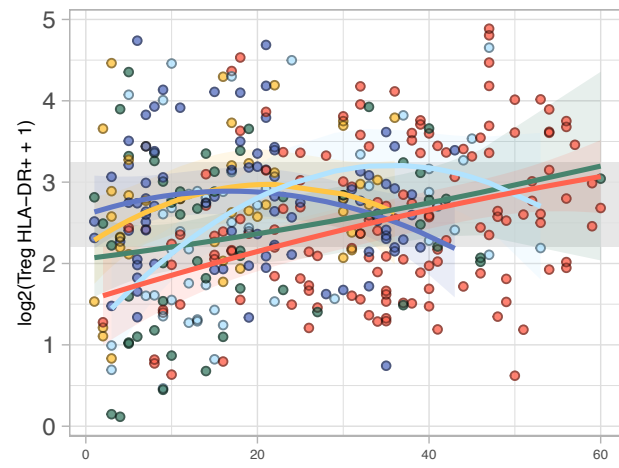

### Treg Helios+

Likelihood ratio test: interaction uncorrected  $p = 0.0067$  (\*\*)

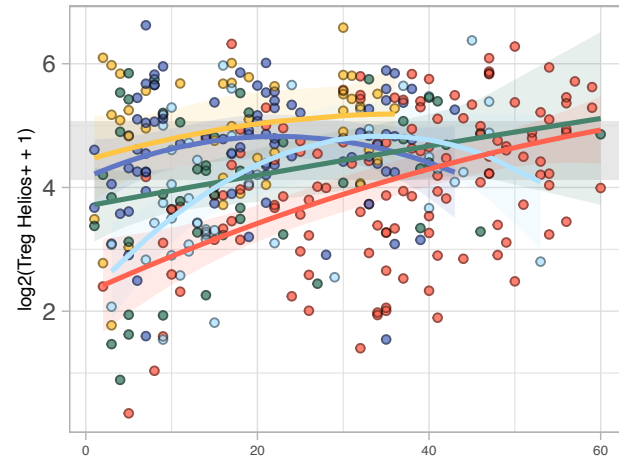

### CD4 CCR6+

Likelihood ratio test: interaction uncorrected  $p = 0.0021$  (\*\*)

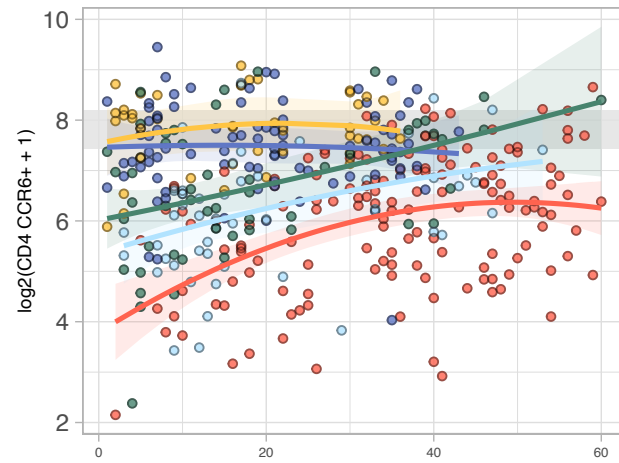

### CD4 CD161+

Likelihood ratio test: interaction uncorrected  $p = 7.6e-05$  (\*\*\*\*)

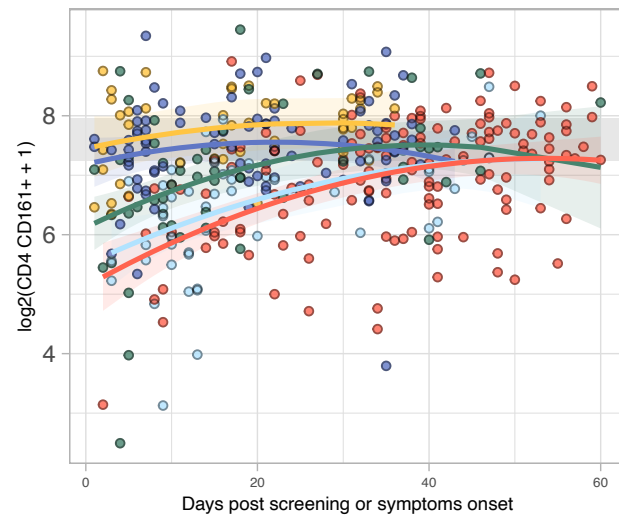



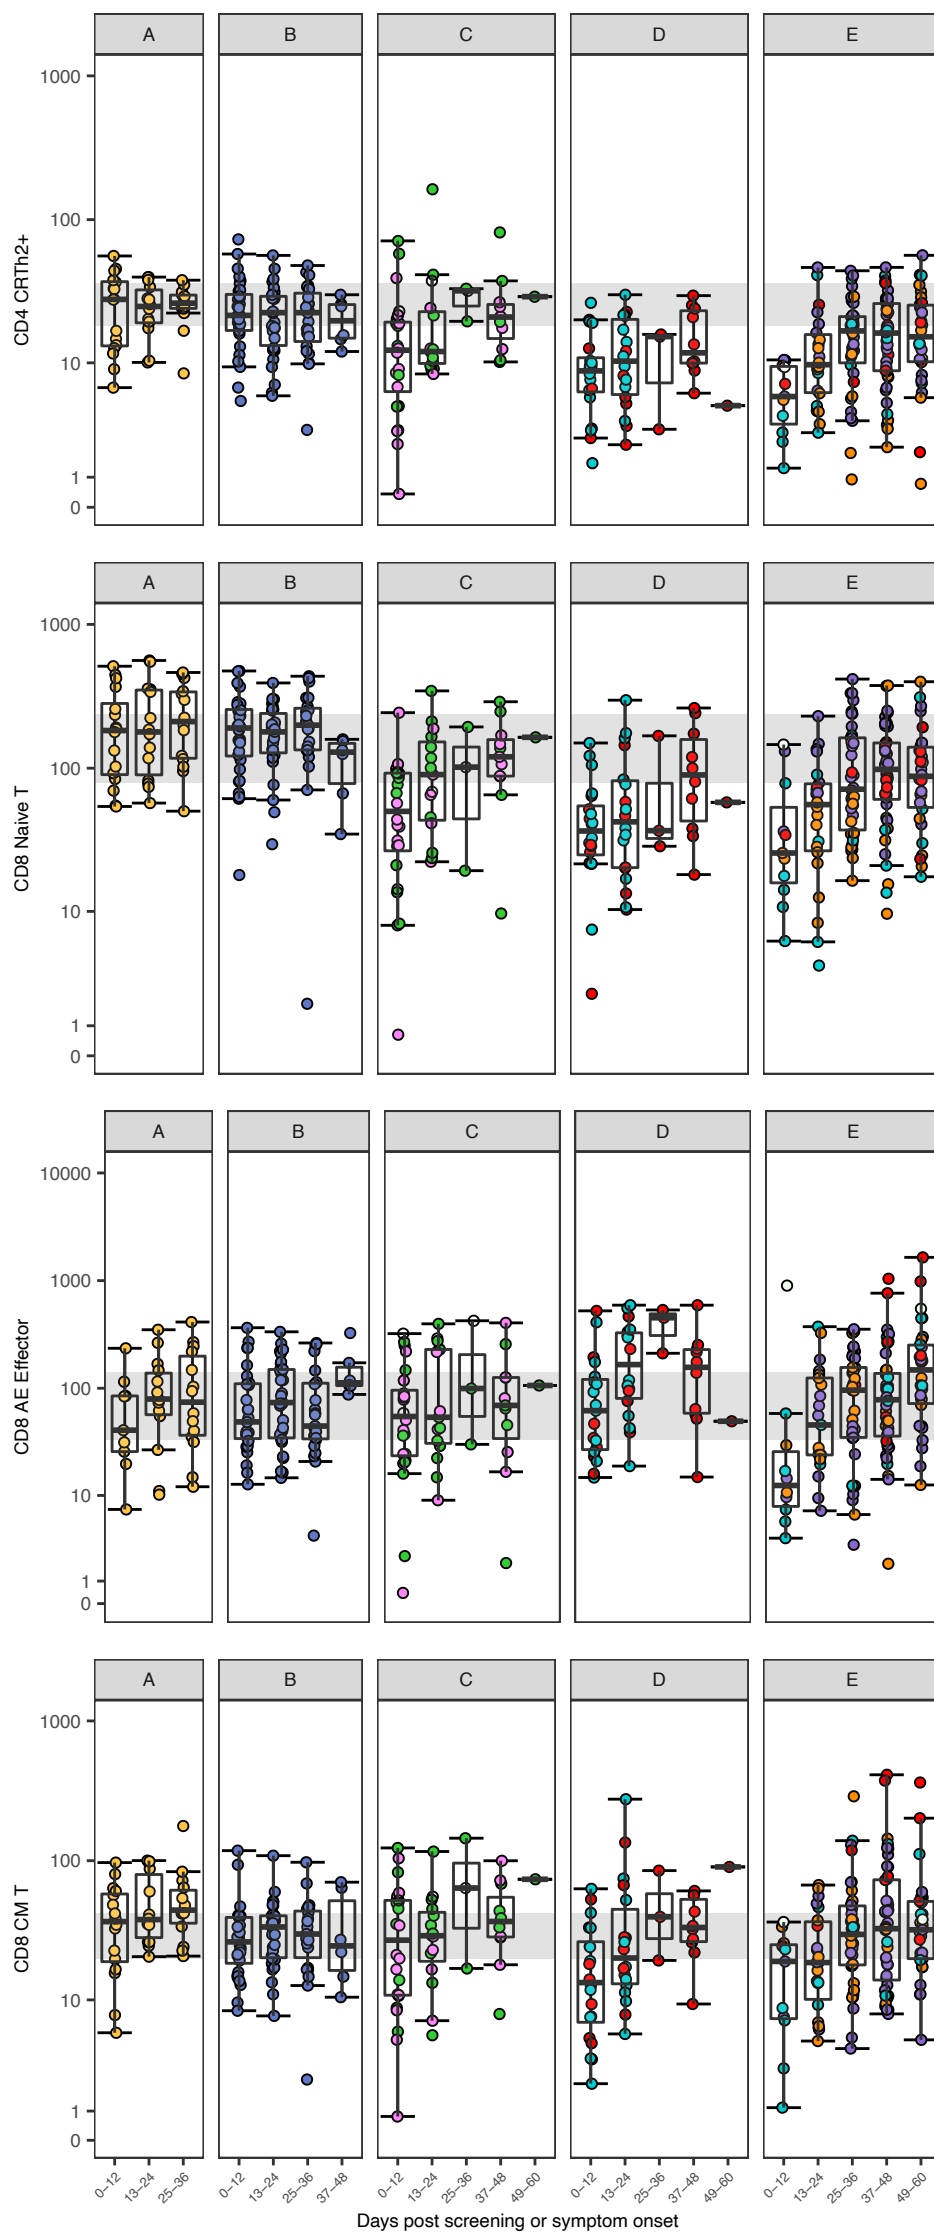

### CD4 CRTh2+

Likelihood ratio test: interaction uncorrected  $p = 0.001$  (\*\*)

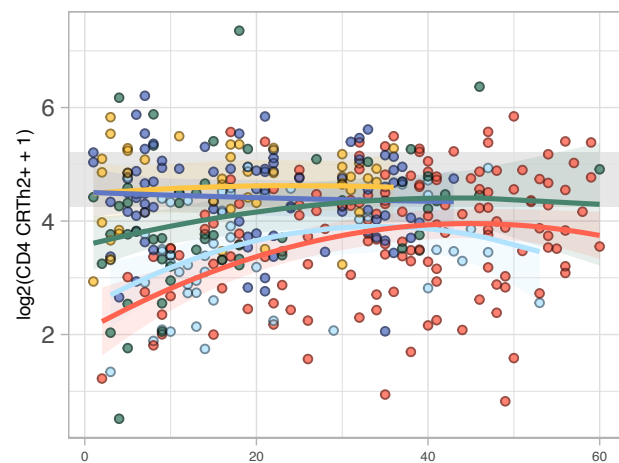

### CD8 Naive T

Likelihood ratio test: interaction uncorrected  $p = 0.0061$  (\*\*)

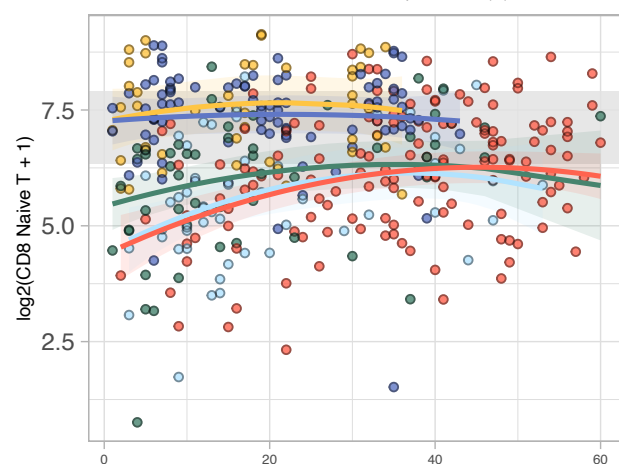

### CD8 AE Effector

Likelihood ratio test: interaction uncorrected  $p = 0.0027$  (\*\*)

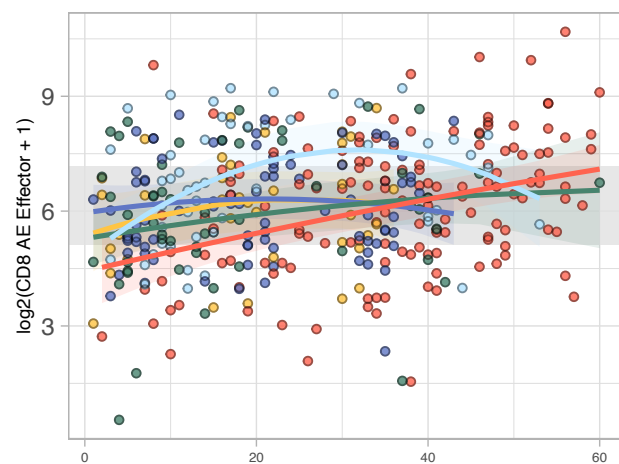

### CD8 CM T

Likelihood ratio test: interaction uncorrected  $p = 0.0029$  (\*\*)

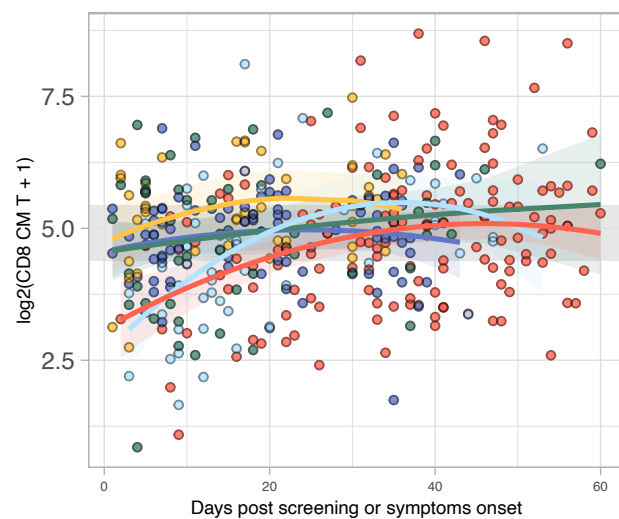

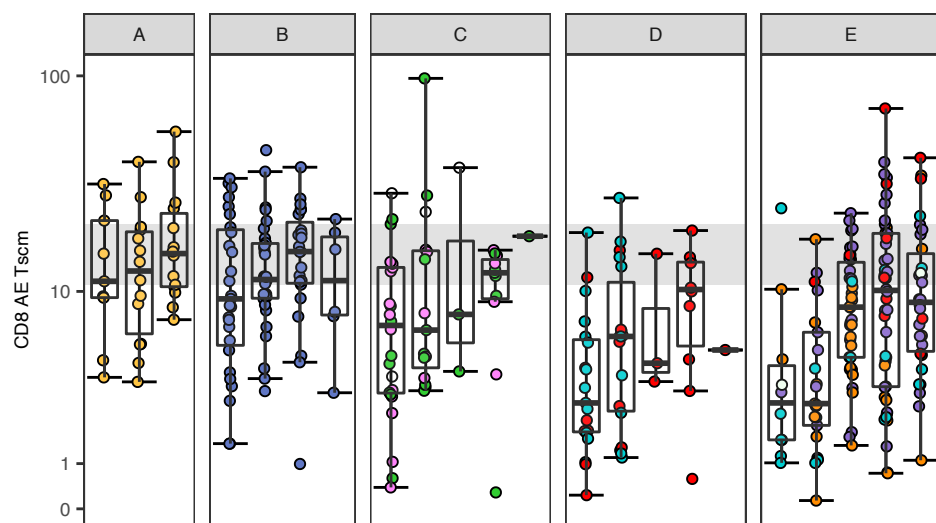

### CD8 AE Tscm

Likelihood ratio test: interaction uncorrected  $p = 0.078$  (.)

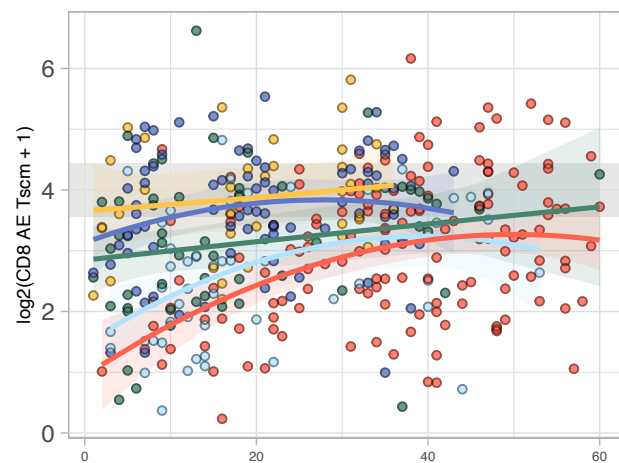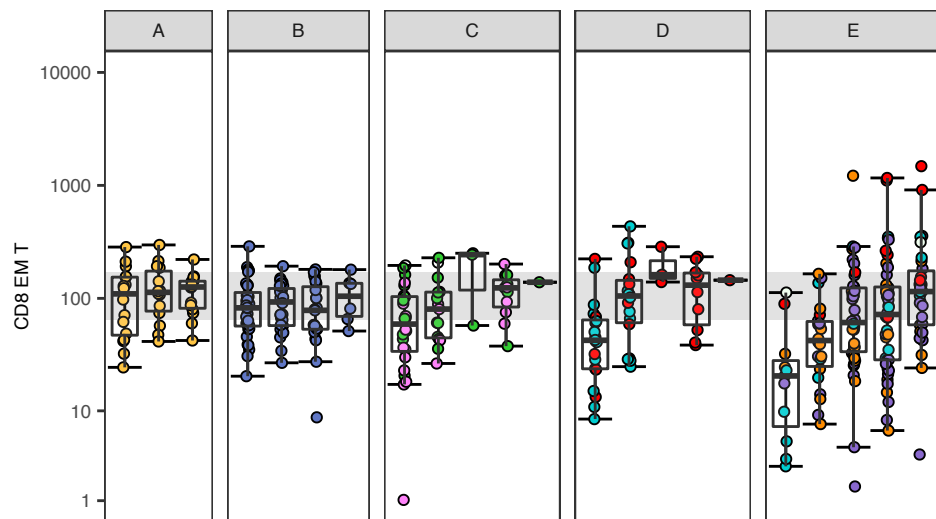

### CD8 EM T

Likelihood ratio test: interaction uncorrected  $p = 6.2\text{e-}07$  (\*\*\*\*)

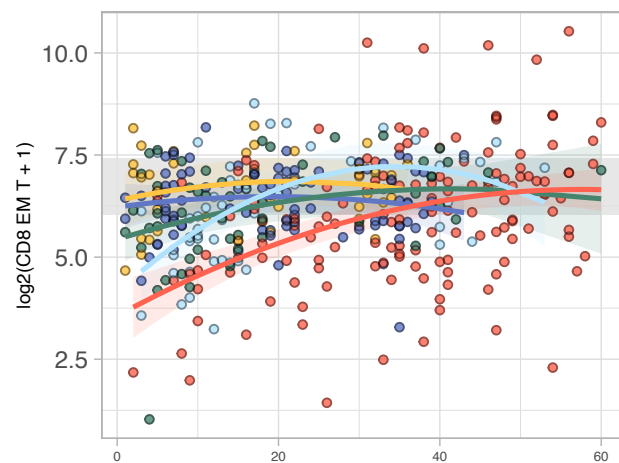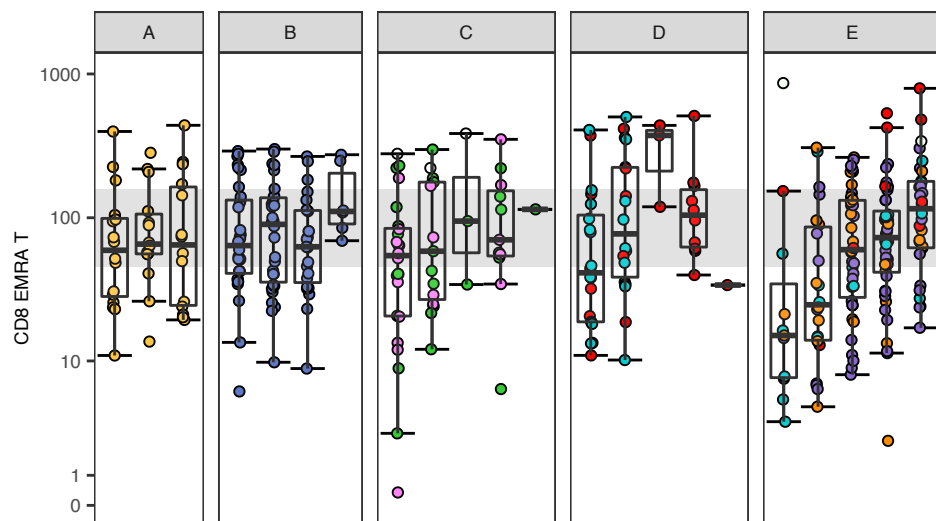

### CD8 EMRA T

Likelihood ratio test: interaction uncorrected  $p = 0.00041$  (\*\*\*)

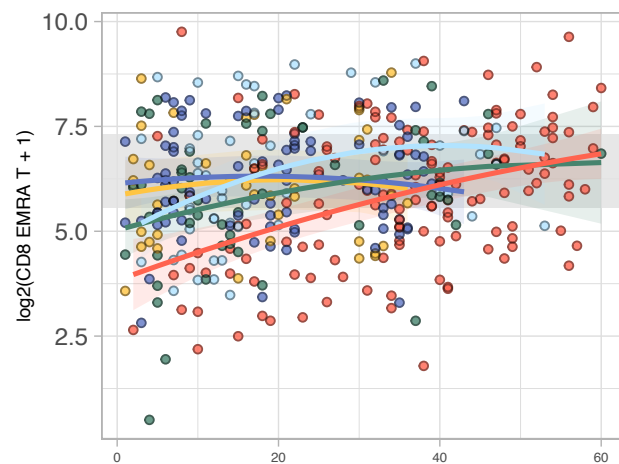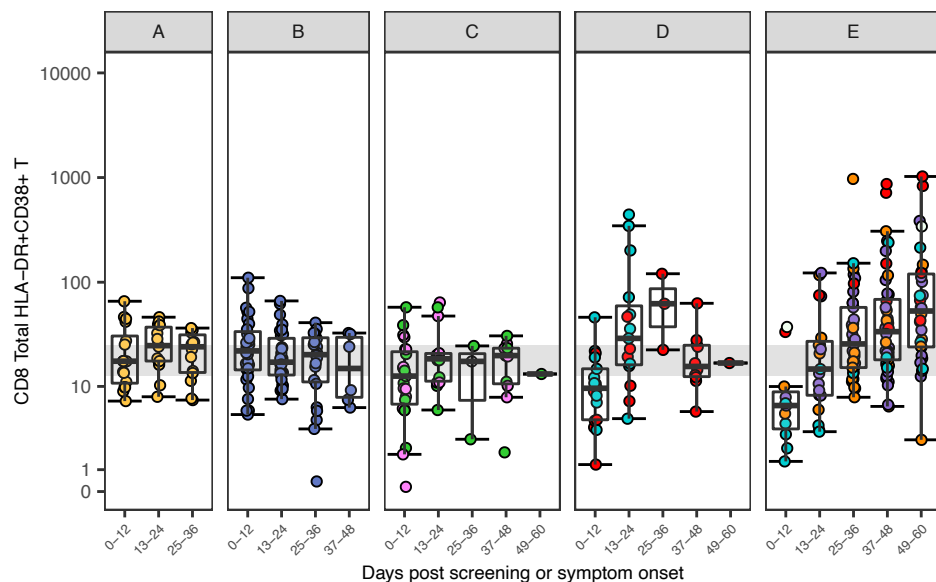

### CD8 Total HLA-DR+CD38+ T

Likelihood ratio test: interaction uncorrected  $p = 1.1\text{e-}08$  (\*\*\*\*)

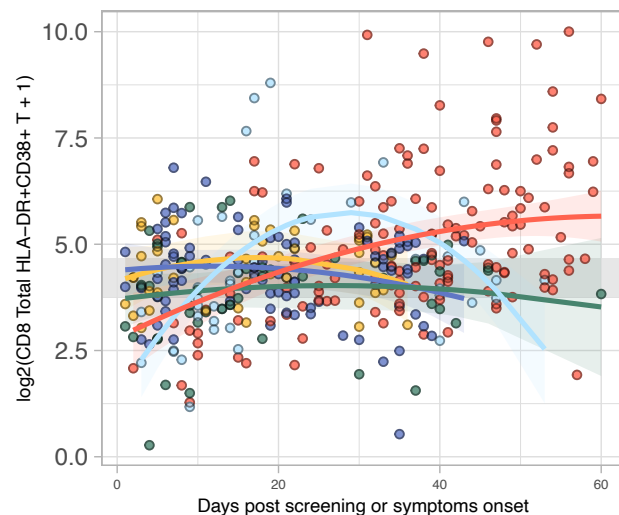

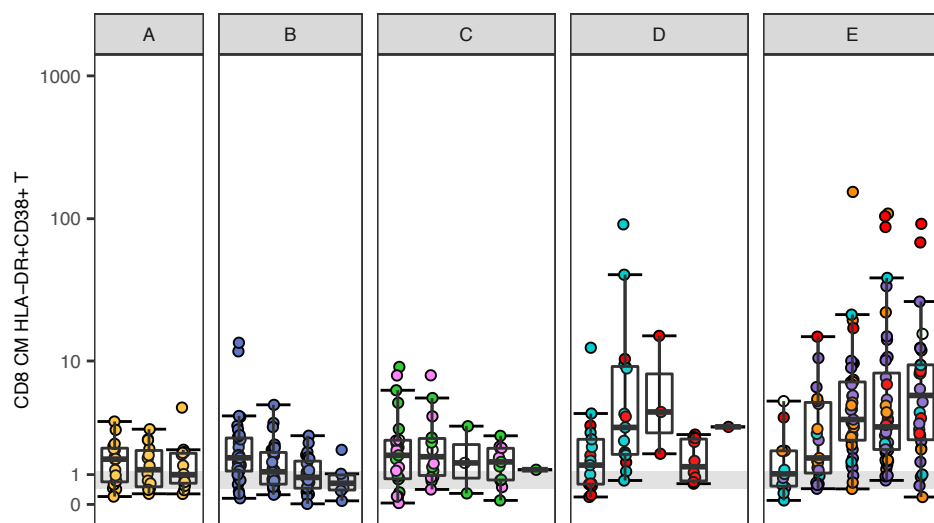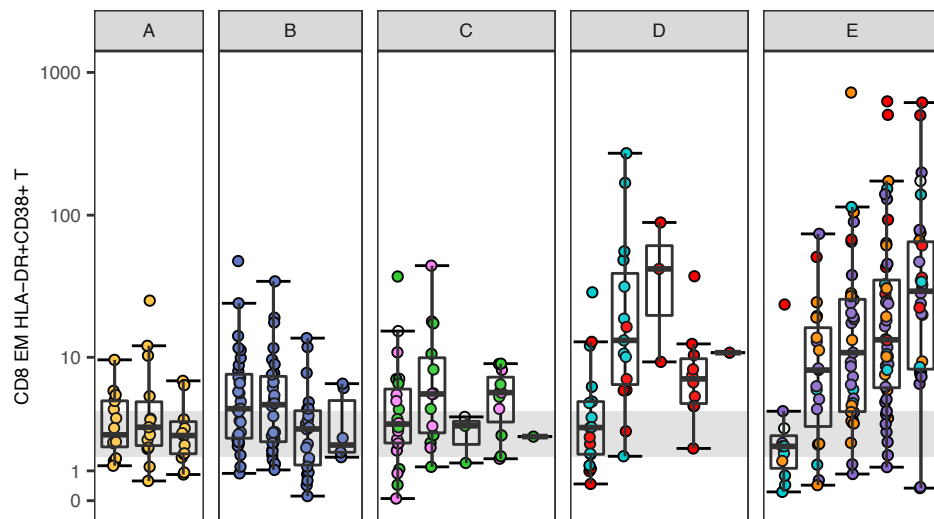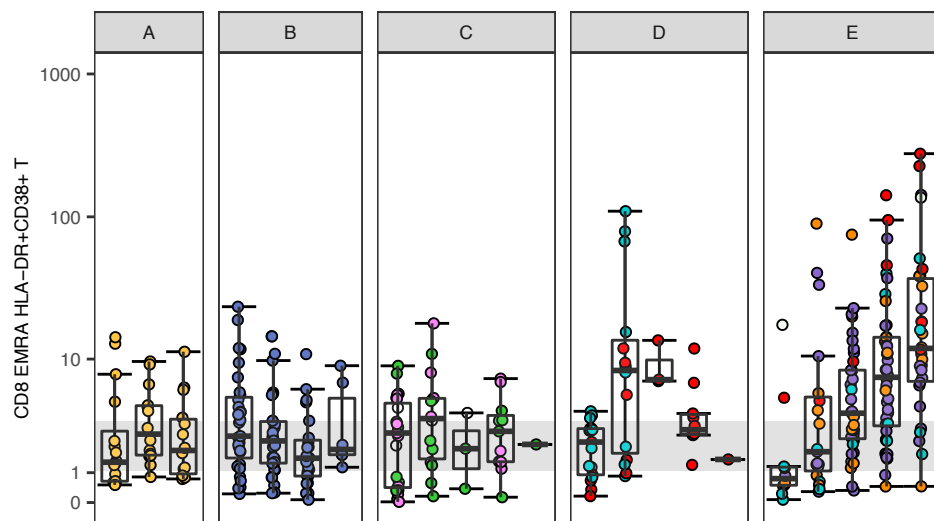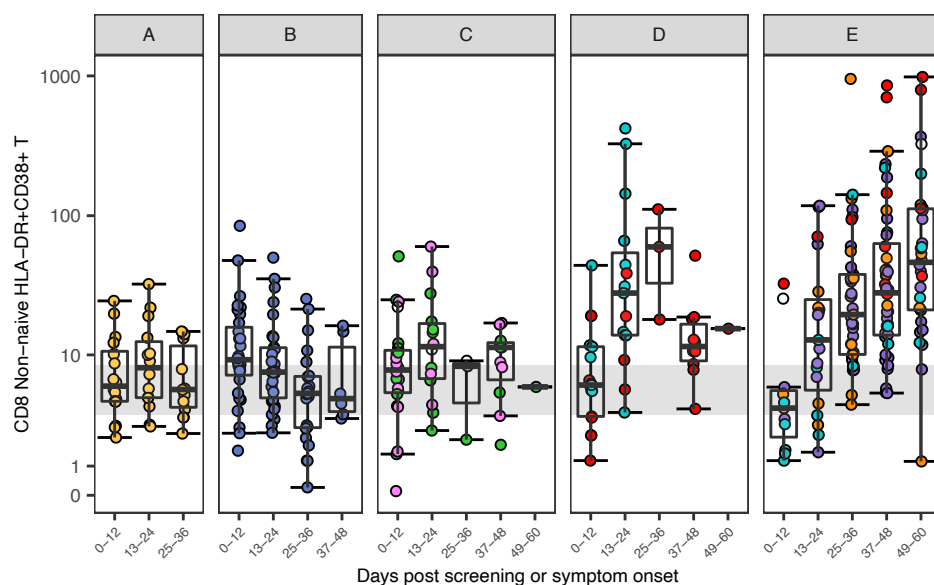

### CD8 CM HLA-DR+CD38+ T

Likelihood ratio test: interaction uncorrected  $p = 1.8e-06$  (\*\*\*\*)

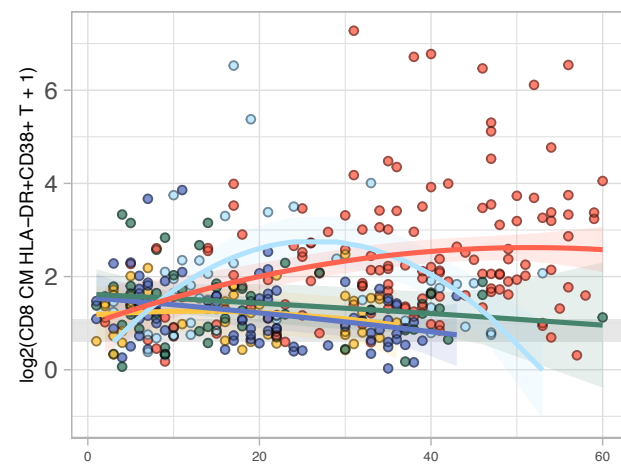

### CD8 EM HLA-DR+CD38+ T

Likelihood ratio test: interaction uncorrected  $p = 1.3e-11$  (\*\*\*\*)

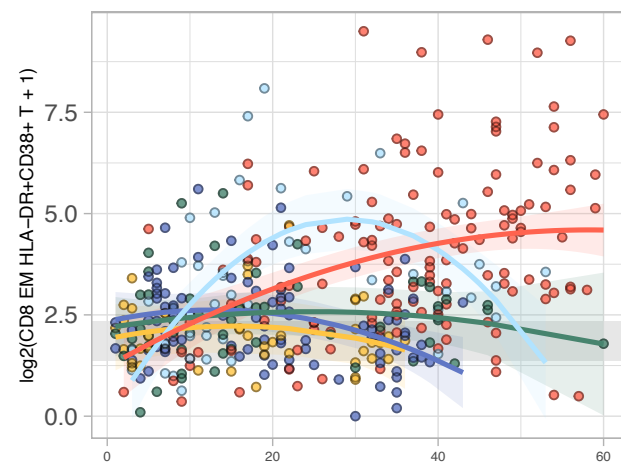

### CD8 EMRA HLA-DR+CD38+ T

Likelihood ratio test: interaction uncorrected  $p = 1e-07$  (\*\*\*\*)

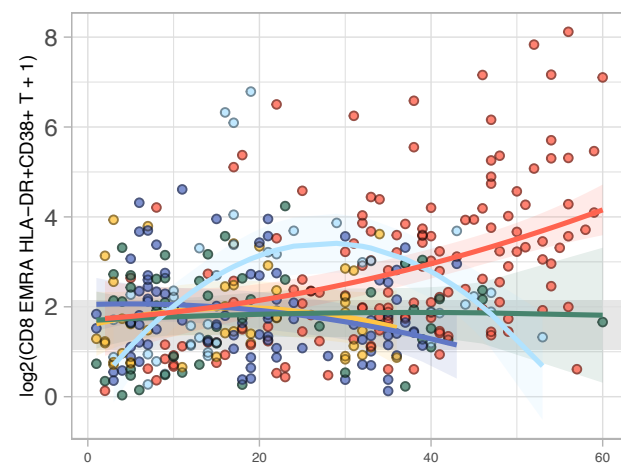

### CD8 Non-naïve HLA-DR+CD38+ T

Likelihood ratio test: interaction uncorrected  $p = 1.3e-11$  (\*\*\*\*)

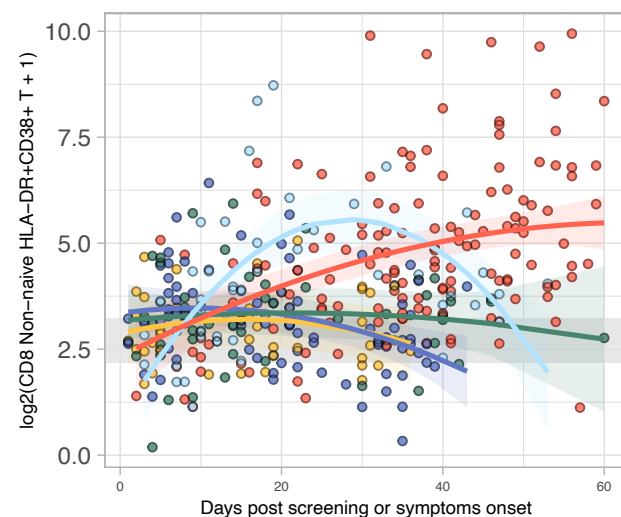

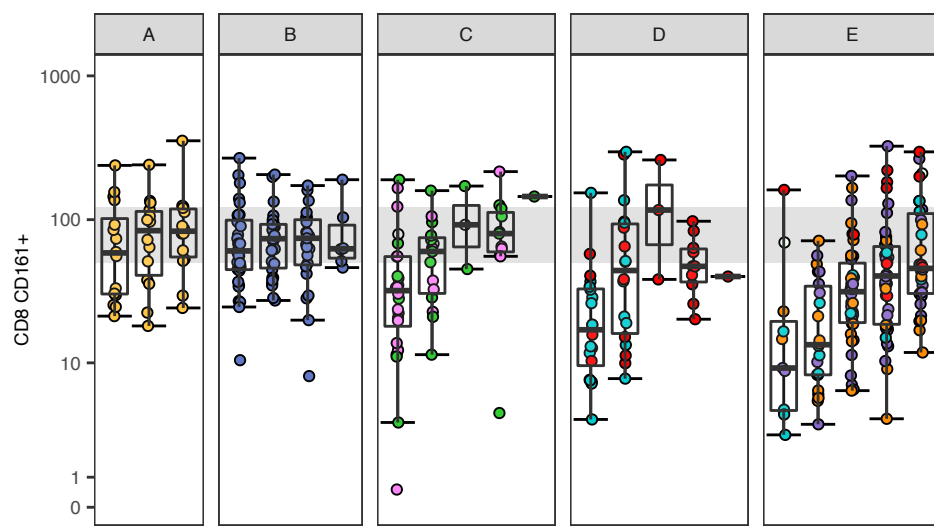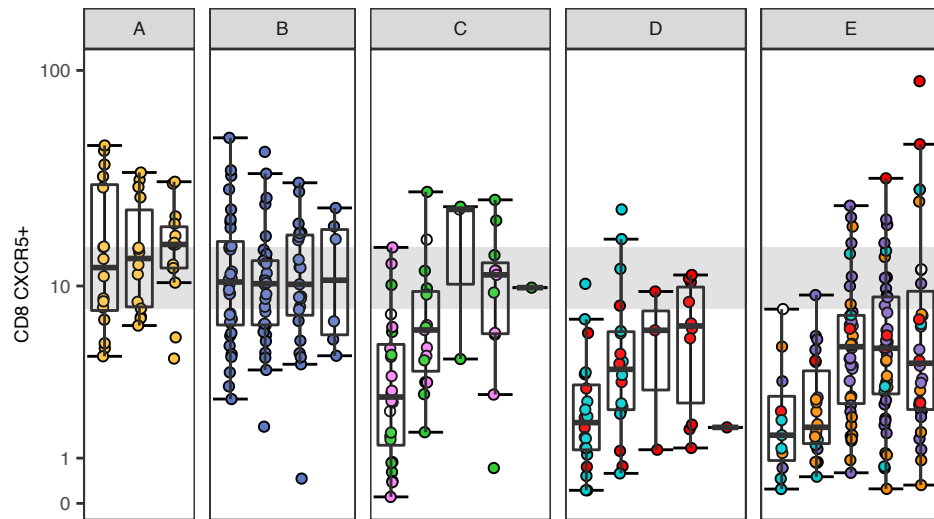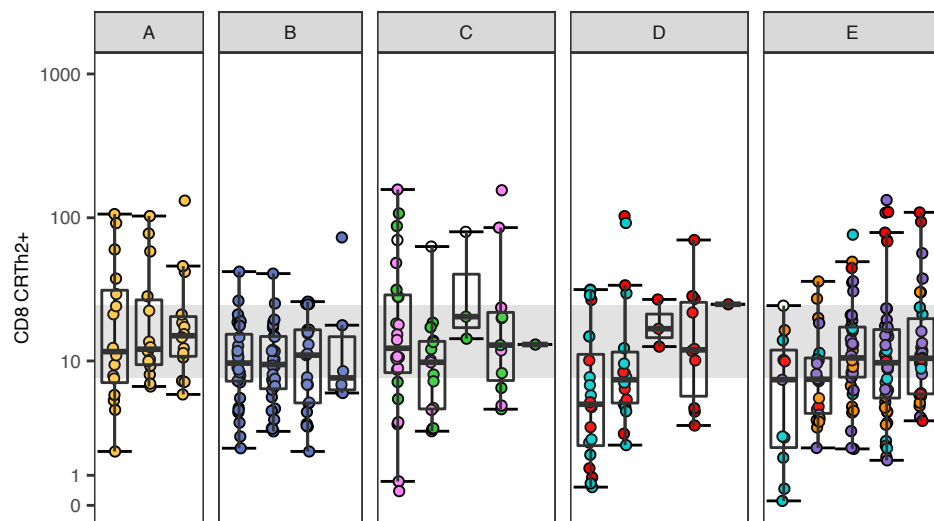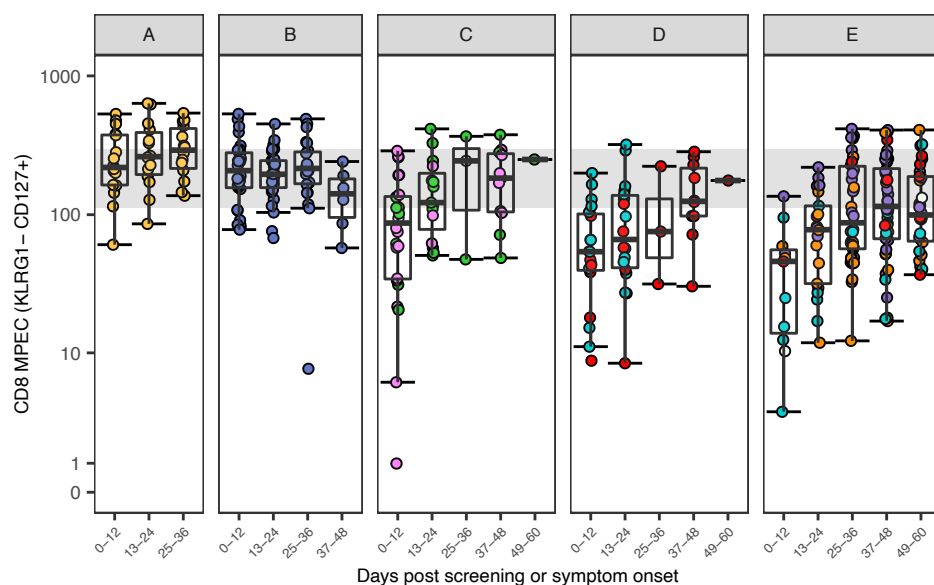

### CD8 CD161+

Likelihood ratio test: interaction uncorrected  $p = 2.1 \times 10^{-5}$  (\*\*\*\*)

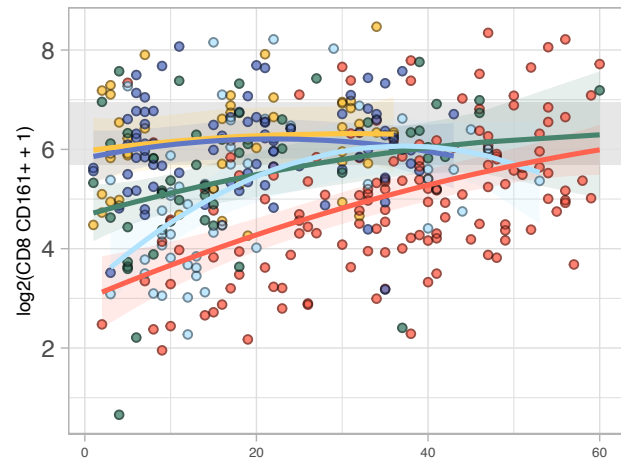

### CD8 CXCR5+

Likelihood ratio test: interaction uncorrected  $p = 0.0011$  (\*\*)

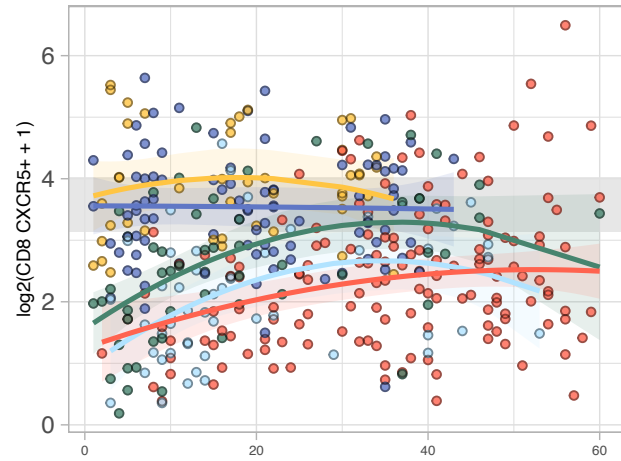

### CD8 CRTh2+

Likelihood ratio test: interaction uncorrected  $p = 0.00017$  (\*\*\*)

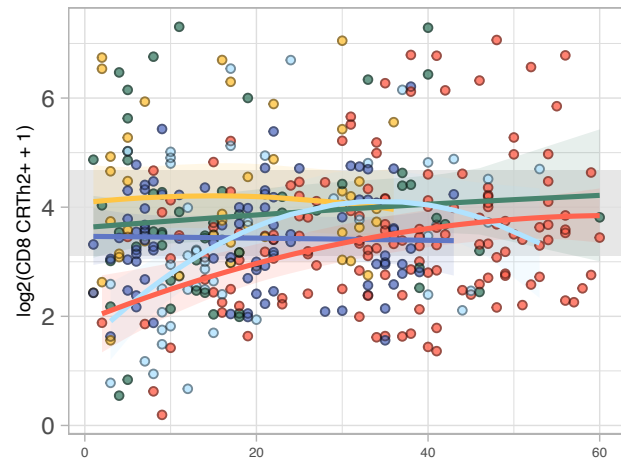

### CD8 MPEC (KLRG1- CD127+)

Likelihood ratio test: interaction uncorrected  $p = 9 \times 10^{-5}$  (\*\*\*\*)

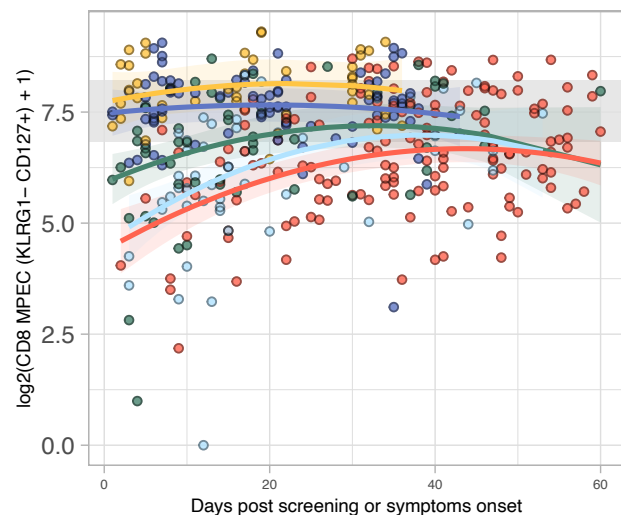



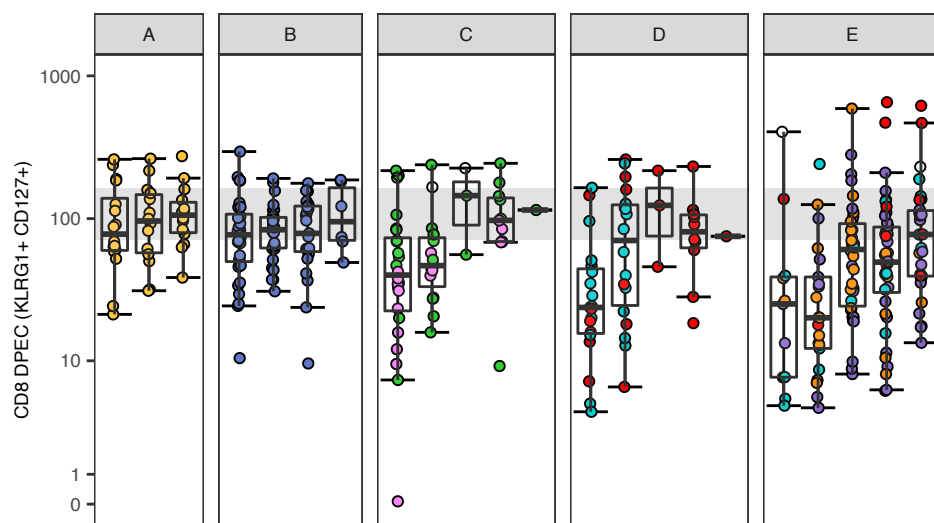

### CD8 DPEC (KLRG1+ CD127+)

Likelihood ratio test: interaction uncorrected  $p = 0.00074$  (\*\*\*)

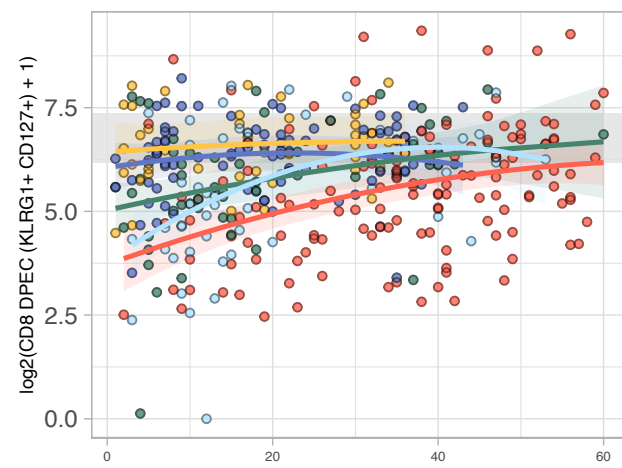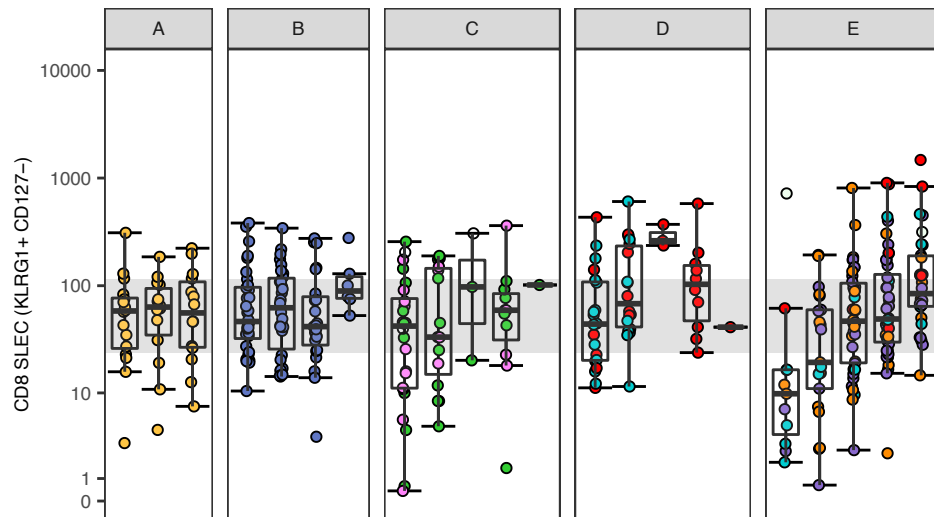

### CD8 SLEC (KLRG1+ CD127-)

Likelihood ratio test: interaction uncorrected  $p = 2.3e-05$  (\*\*\*\*)

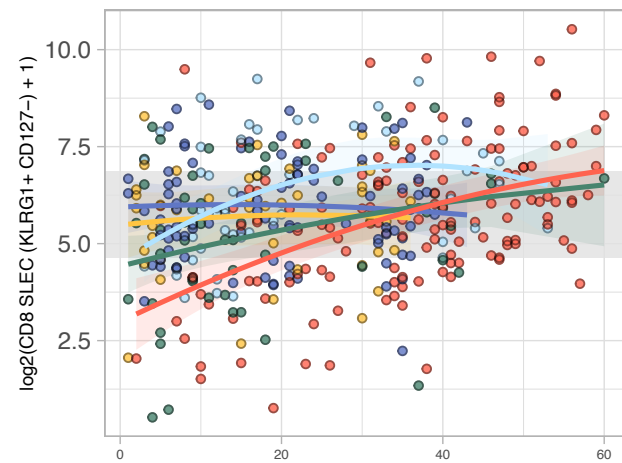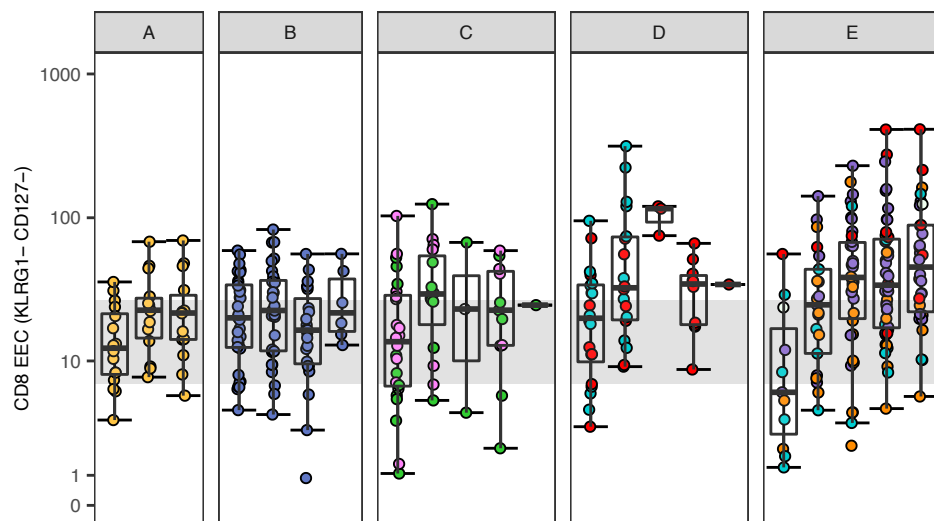

### CD8 EEC (KLRG1- CD127-)

Likelihood ratio test: interaction uncorrected  $p = 1.2e-05$  (\*\*\*\*)

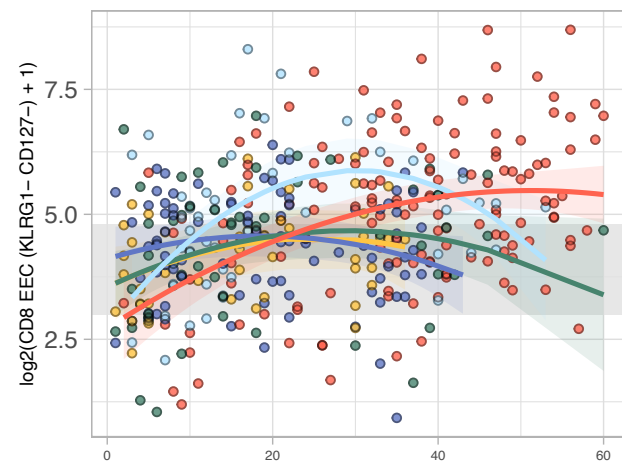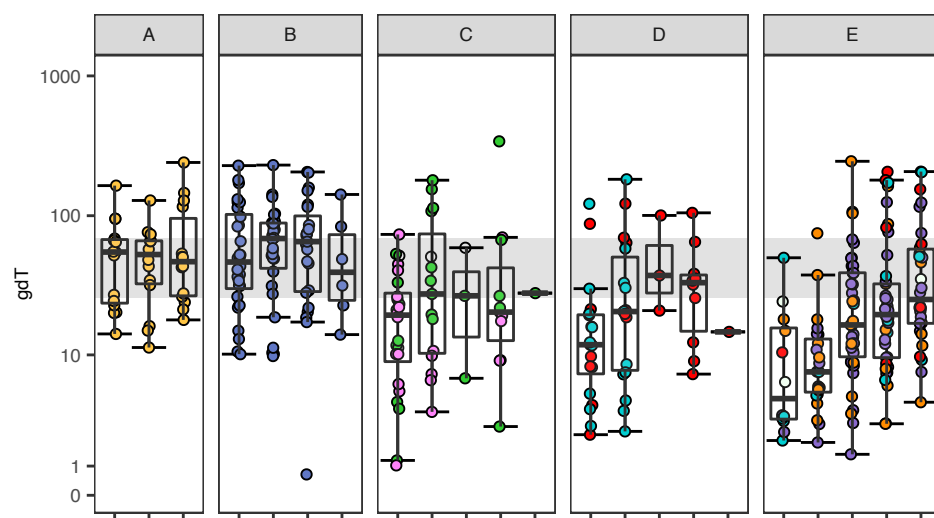

### gdT

Likelihood ratio test: interaction uncorrected  $p = 2.9e-05$  (\*\*\*\*)

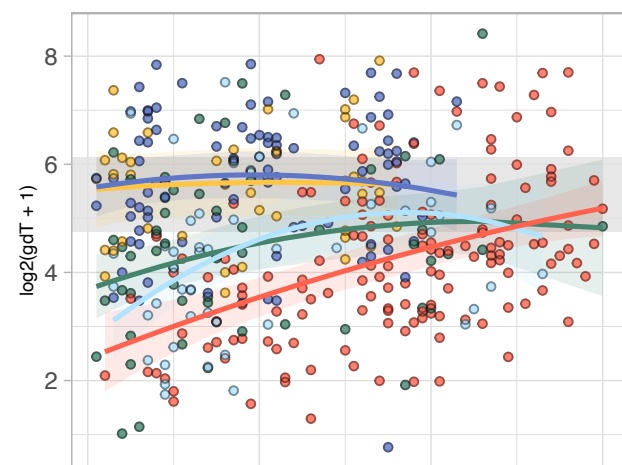

Days post screening or symptom onset

Days post screening or symptoms onset

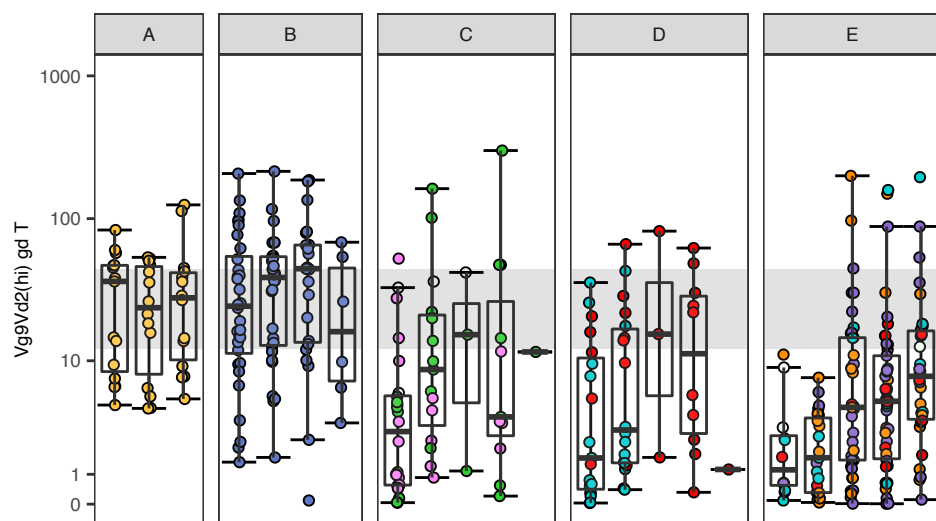

### Vg9Vd2(hi) gd T

Likelihood ratio test: interaction uncorrected  $p = 0.0028$  (\*\*)

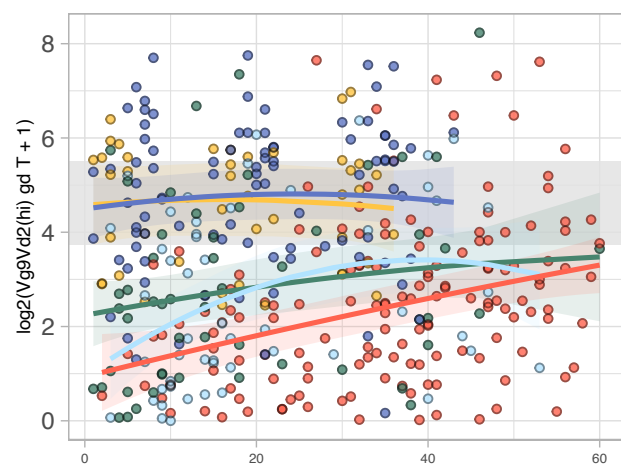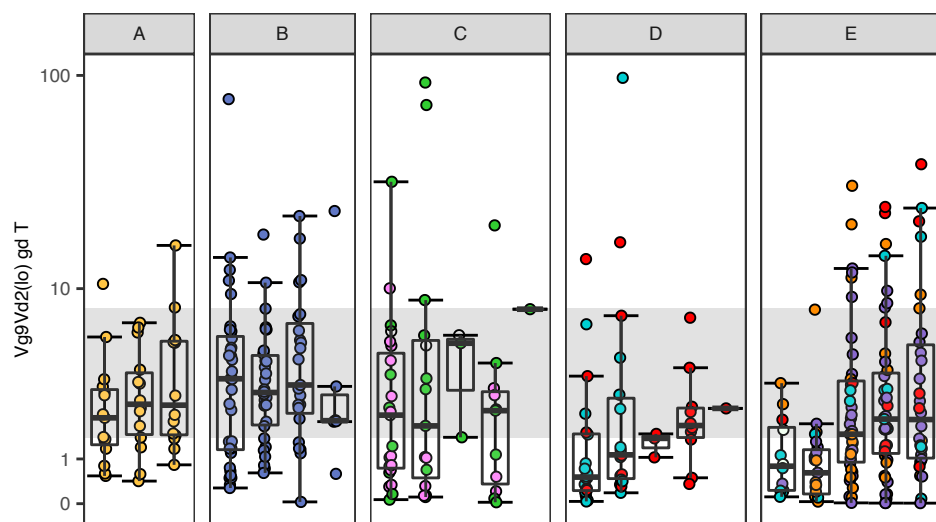

### Vg9Vd2(lo) gd T

Likelihood ratio test: interaction uncorrected  $p = 0.58$

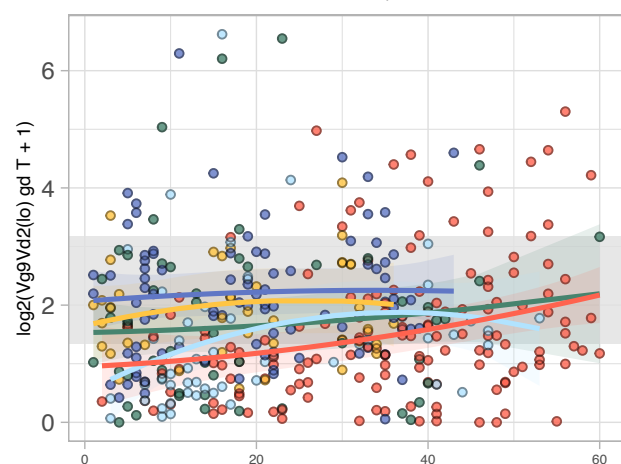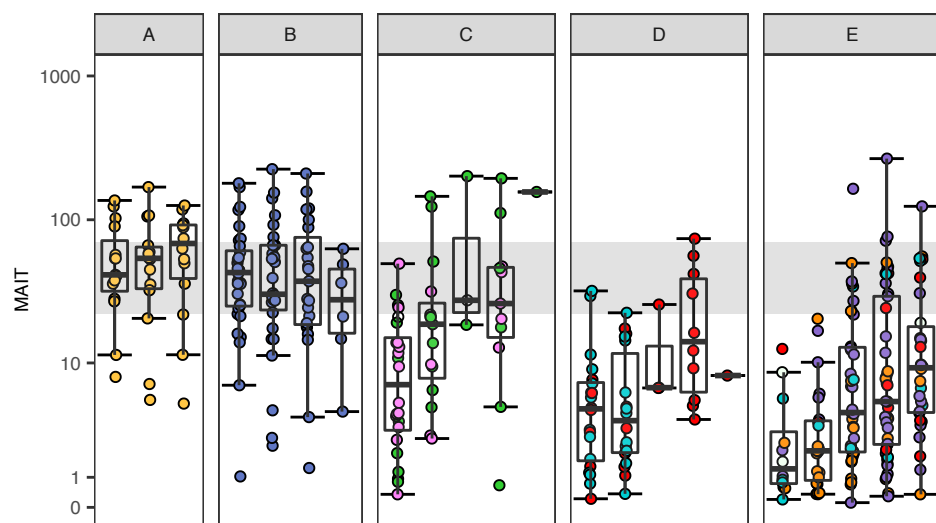

### MAIT

Likelihood ratio test: interaction uncorrected  $p = 0.00019$  (\*\*\*)

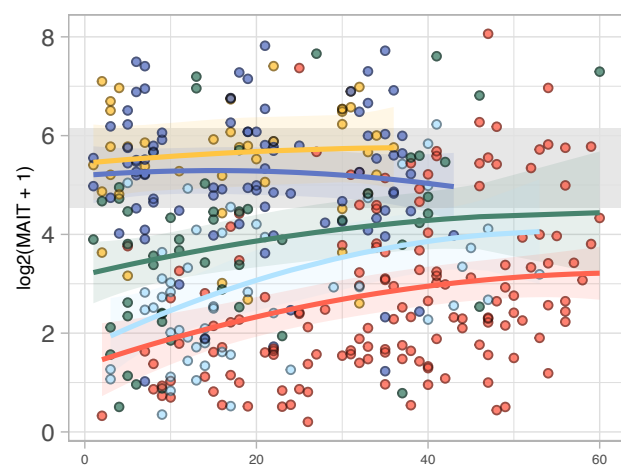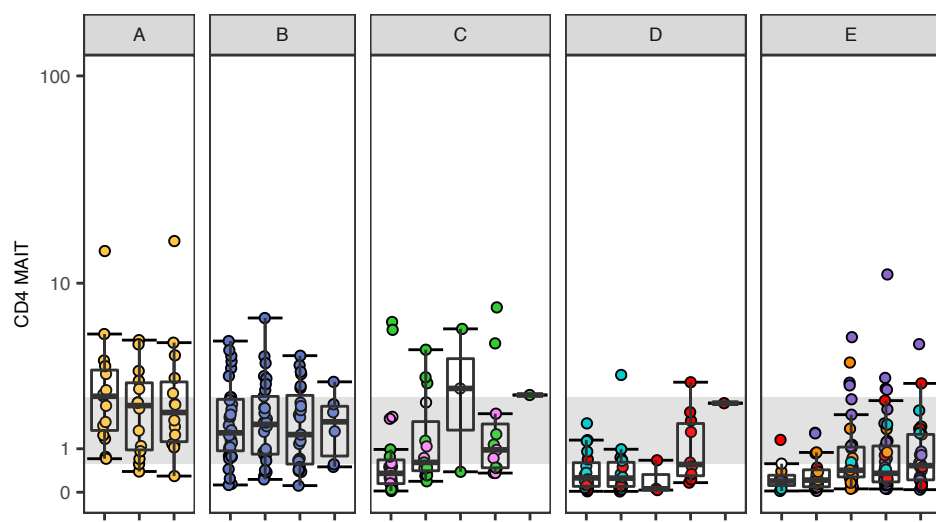

### CD4 MAIT

Likelihood ratio test: interaction uncorrected  $p = 0.087$  (.)

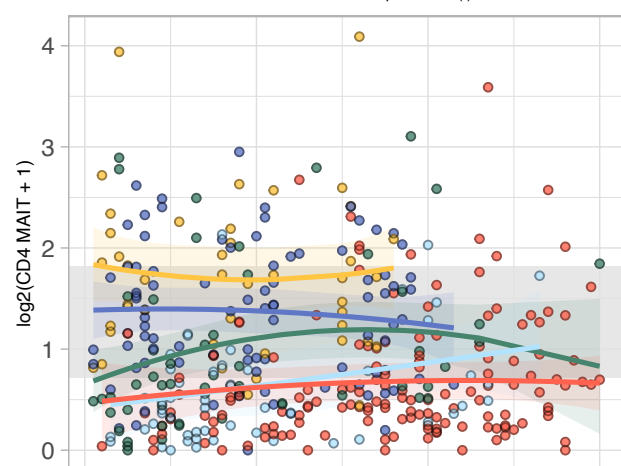

Days post screening or symptom onset

Days post screening or symptoms onset

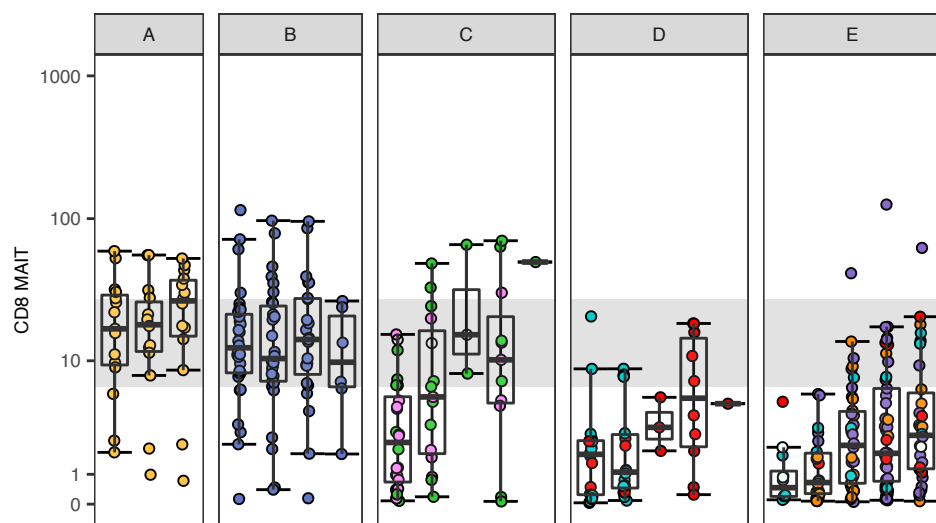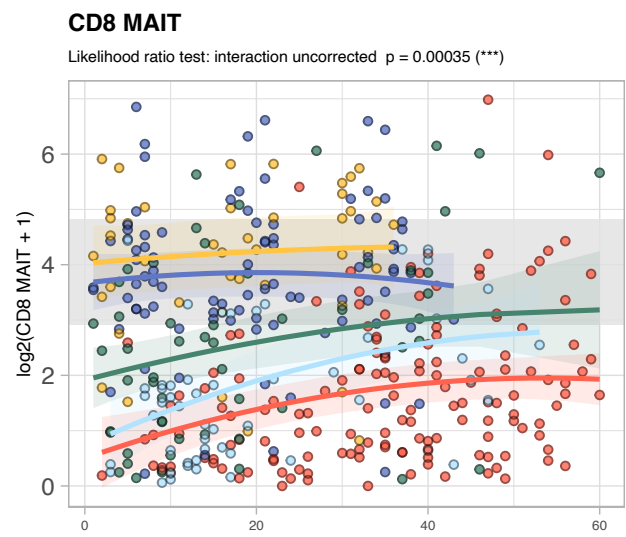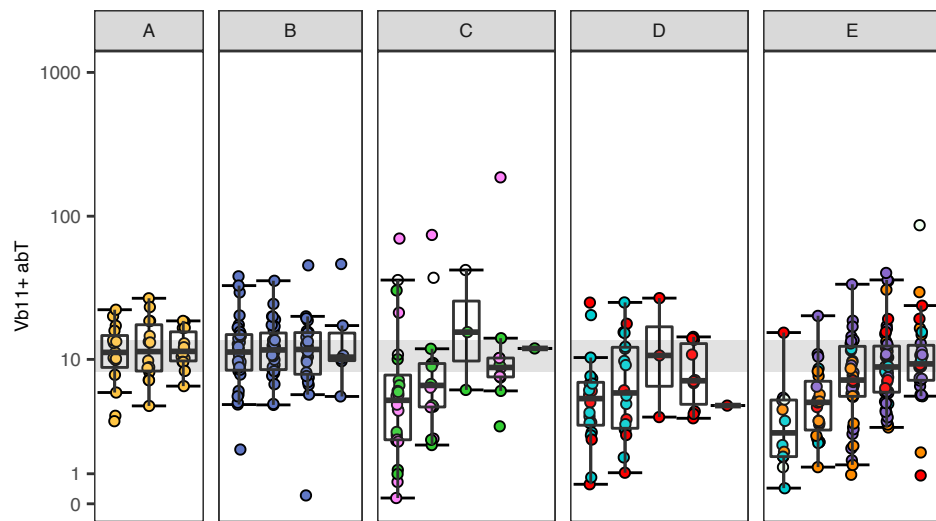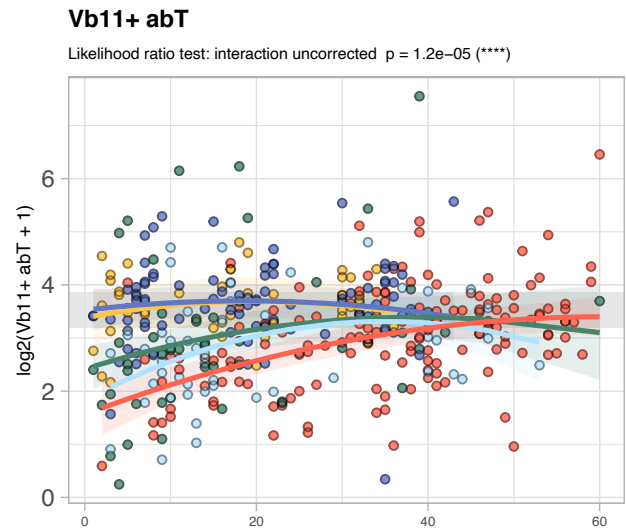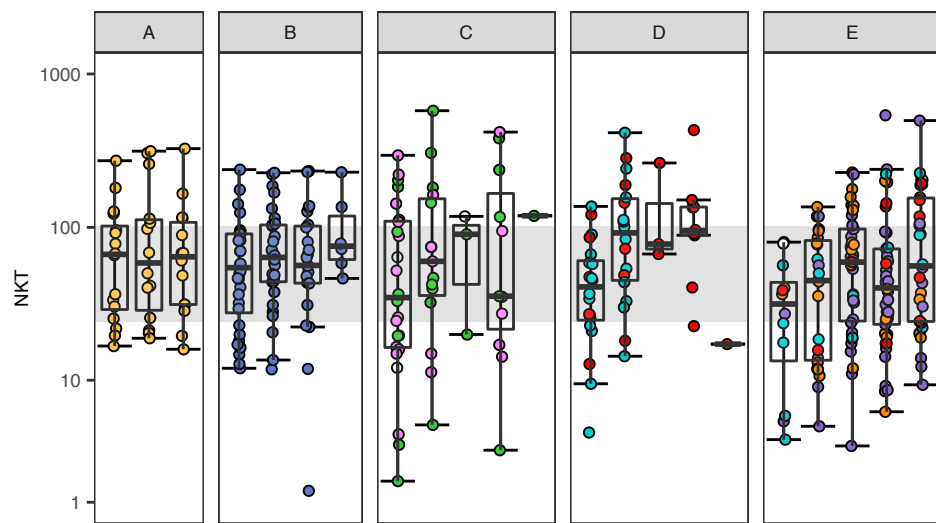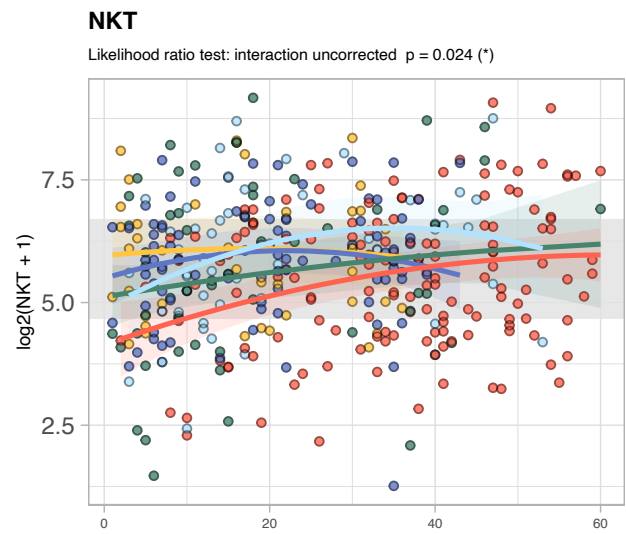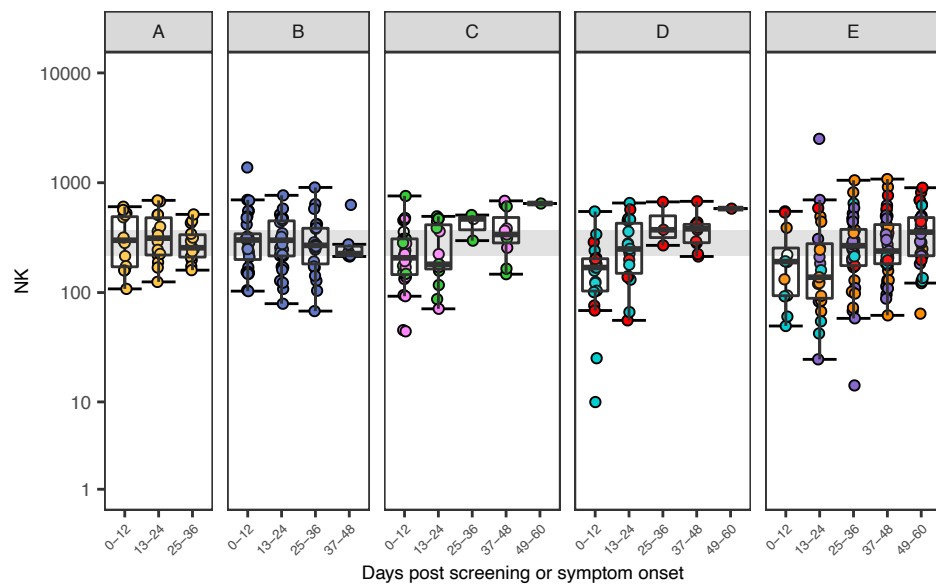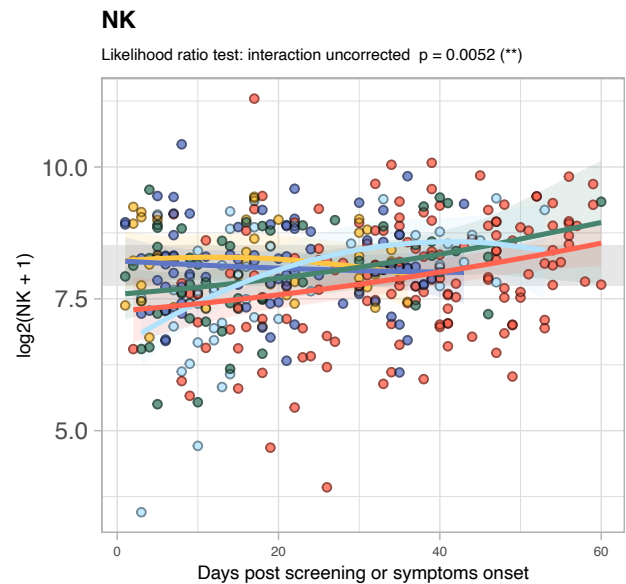

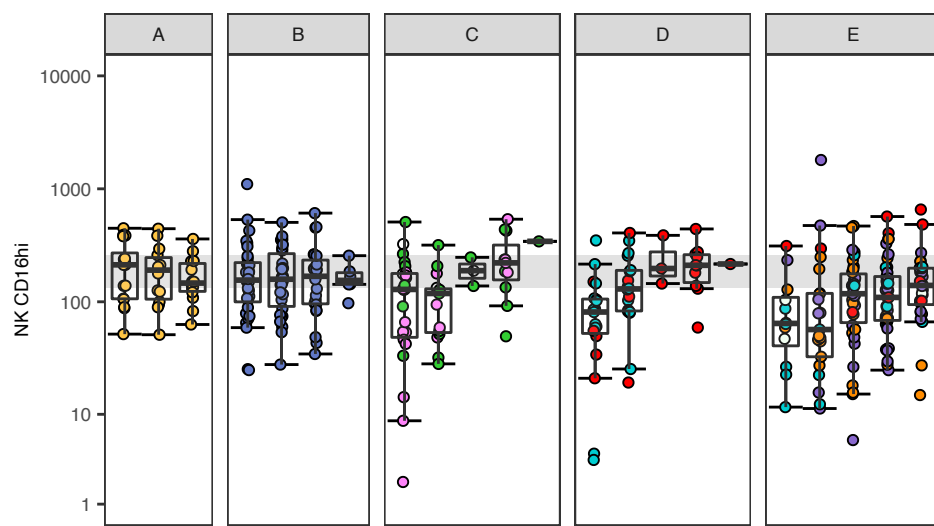

### NK CD16hi

Likelihood ratio test: interaction uncorrected  $p = 0.0076$  (\*\*)

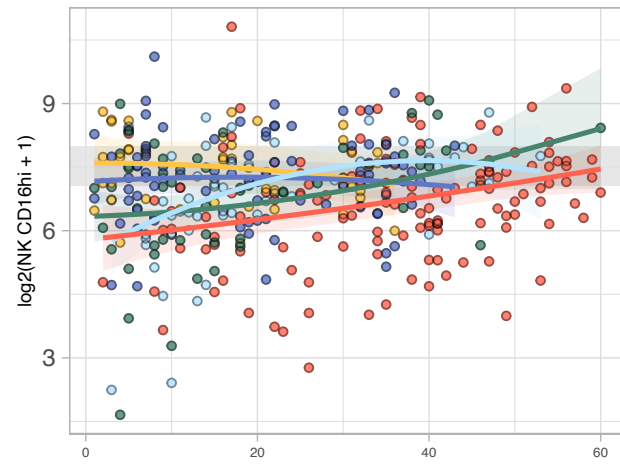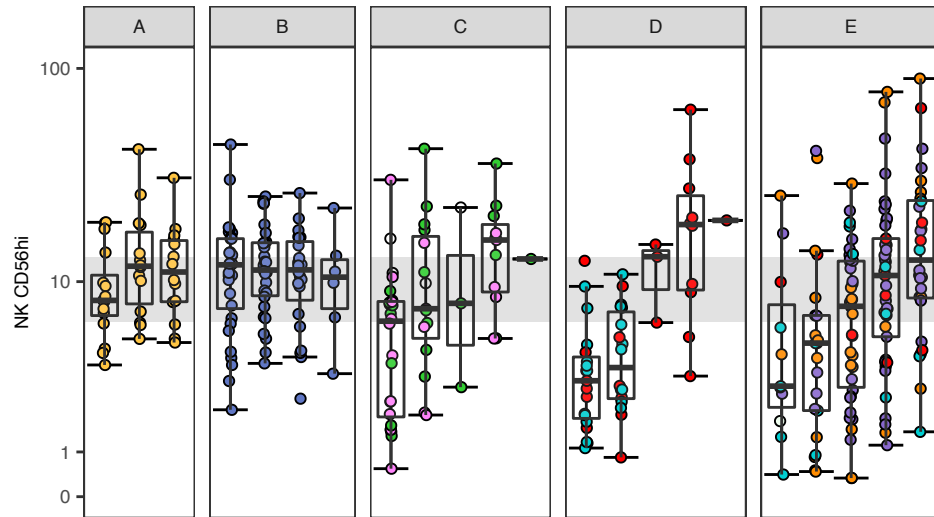

### NK CD56hi

Likelihood ratio test: interaction uncorrected  $p = 3.5e-05$  (\*\*\*\*)

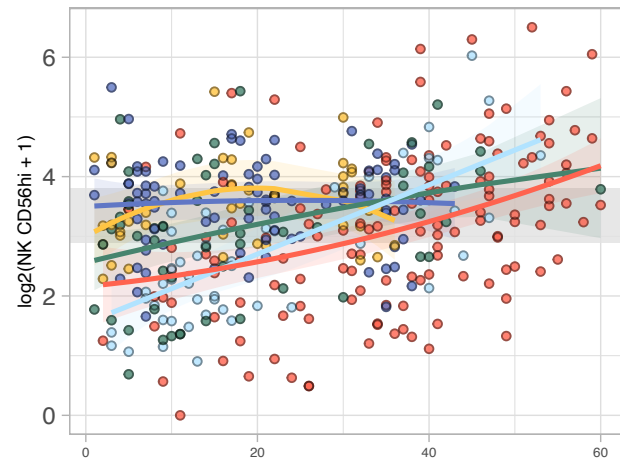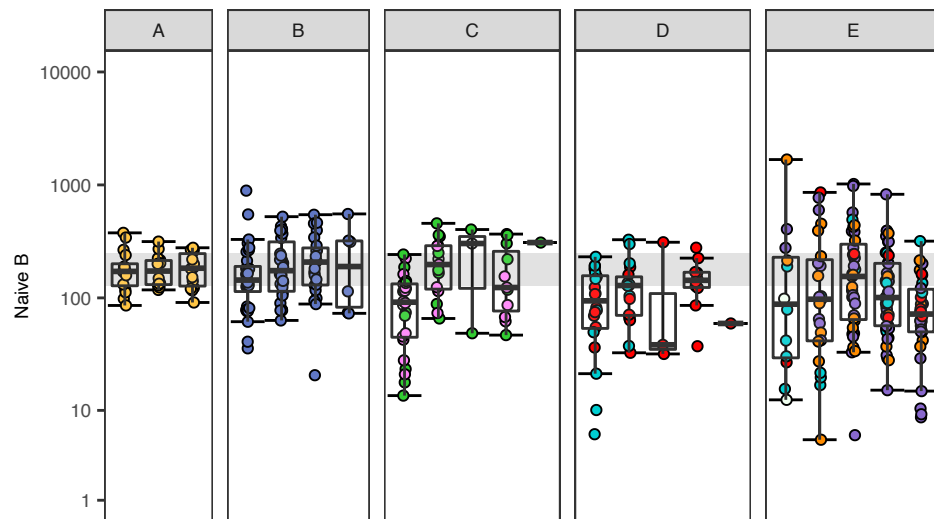

### Naive B

Likelihood ratio test: interaction uncorrected  $p = 0.35$

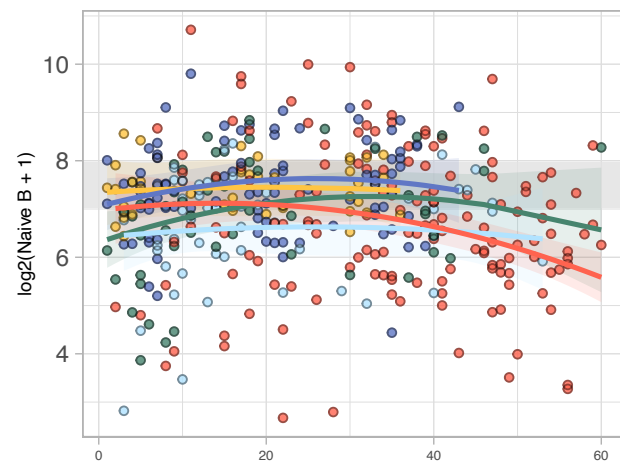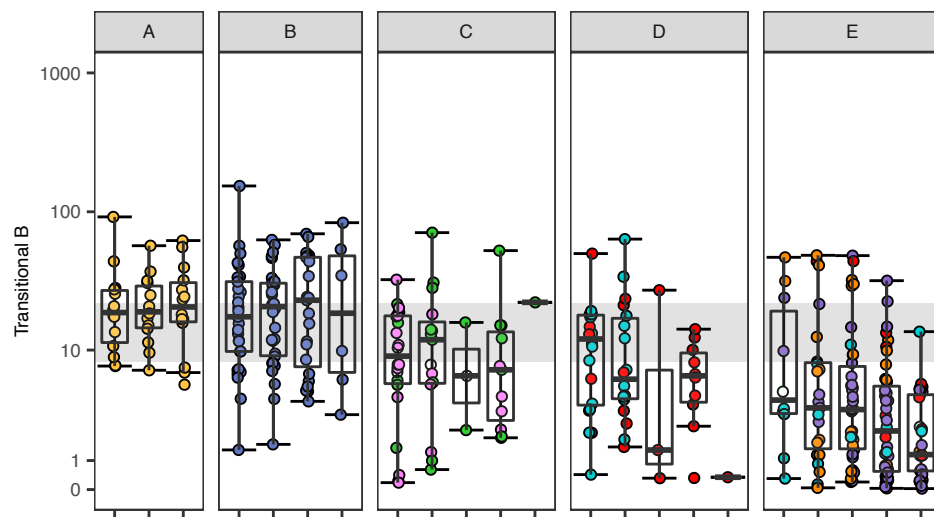

### Transitional B

Likelihood ratio test: interaction uncorrected  $p = 0.0045$  (\*\*)

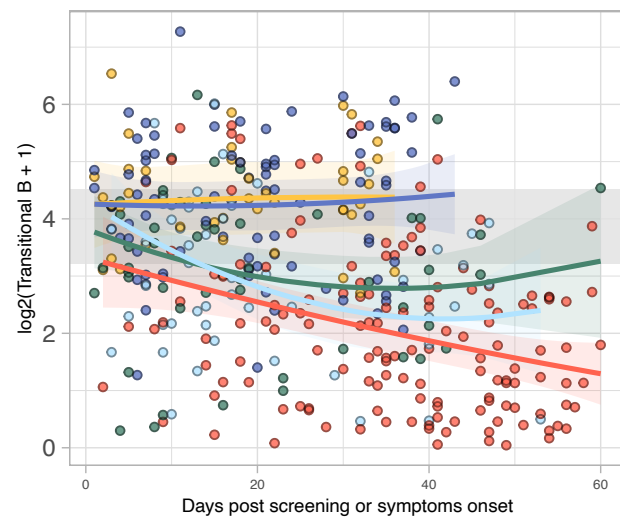



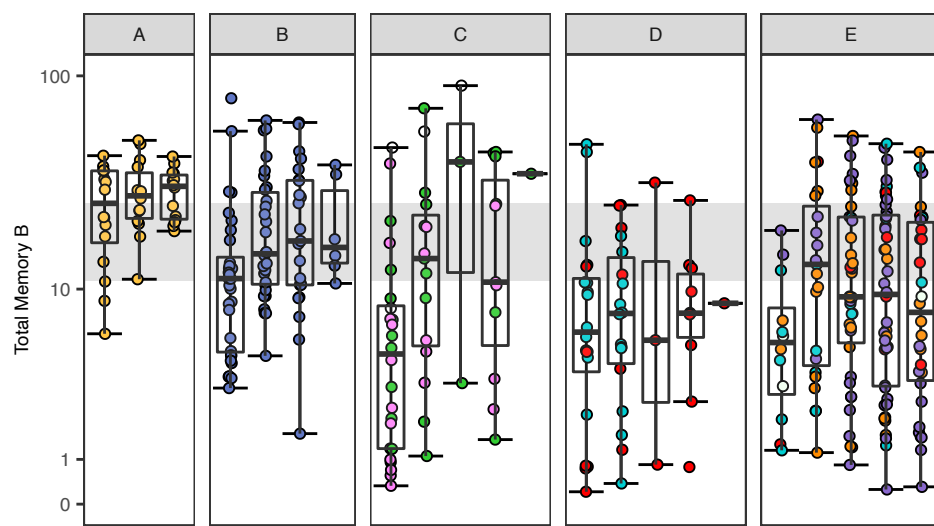

## Total Memory B

Likelihood ratio test: interaction uncorrected  $p = 0.062$  (.)

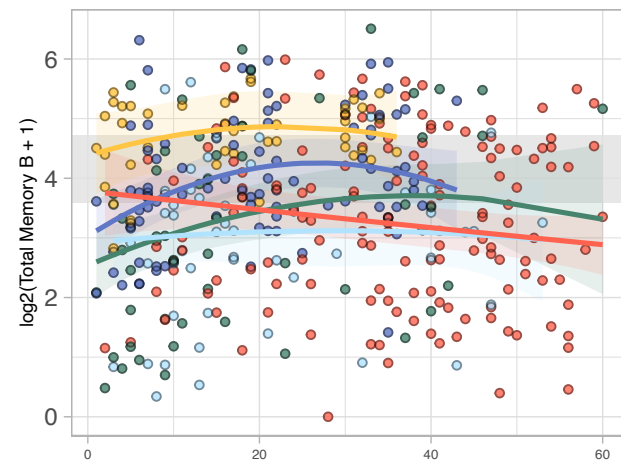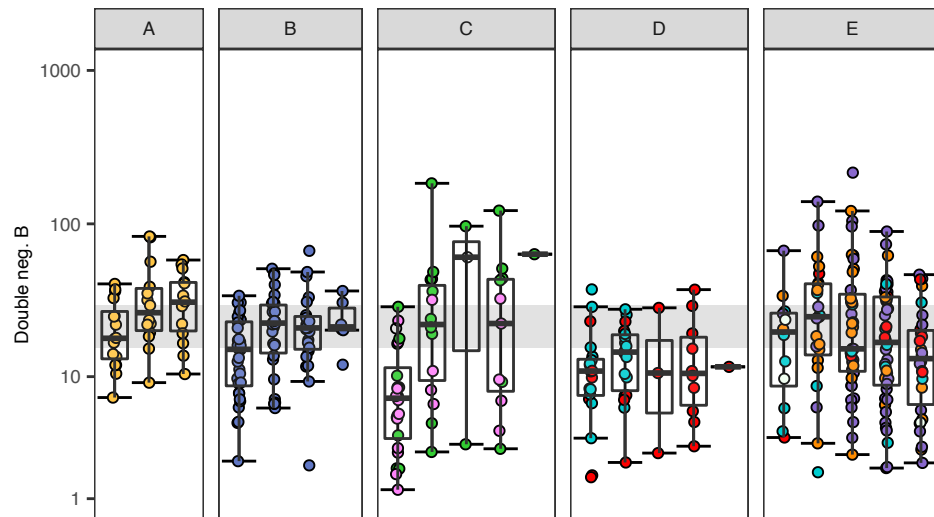

## Double neg. B

Likelihood ratio test: interaction uncorrected  $p = 0.023$  (\*)

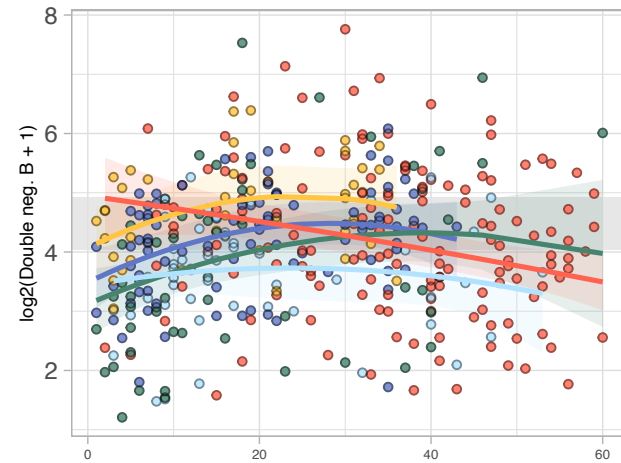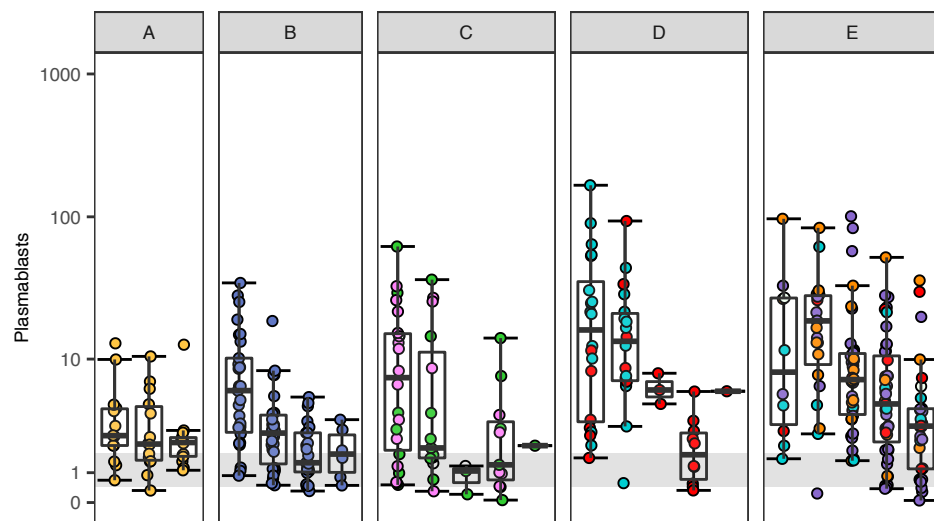

## Plasmablasts

Likelihood ratio test: interaction uncorrected  $p = 0.16$

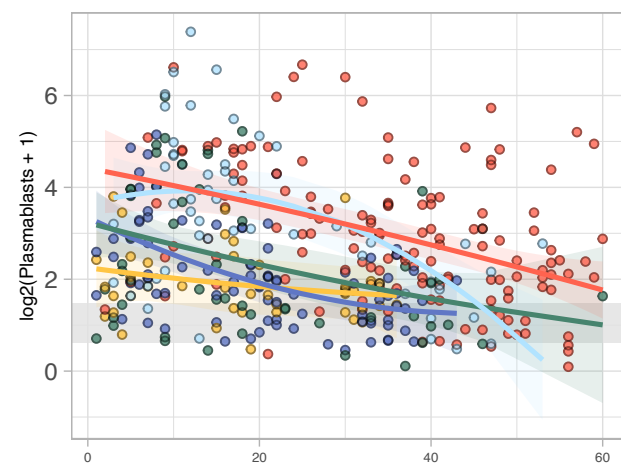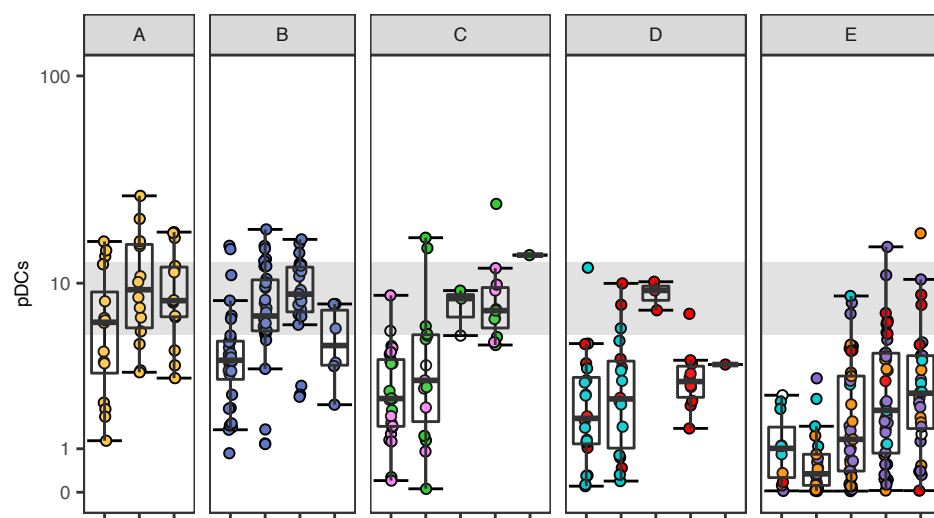

## pDCs

Likelihood ratio test: interaction uncorrected  $p = 0.033$  (\*)

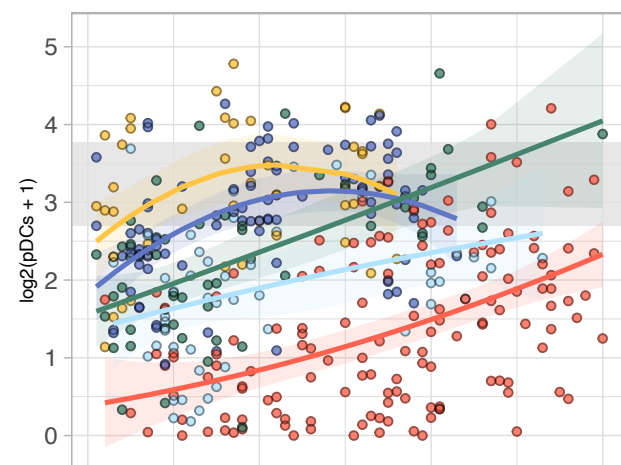

Days post screening or symptom onset

Days post screening or symptoms onset

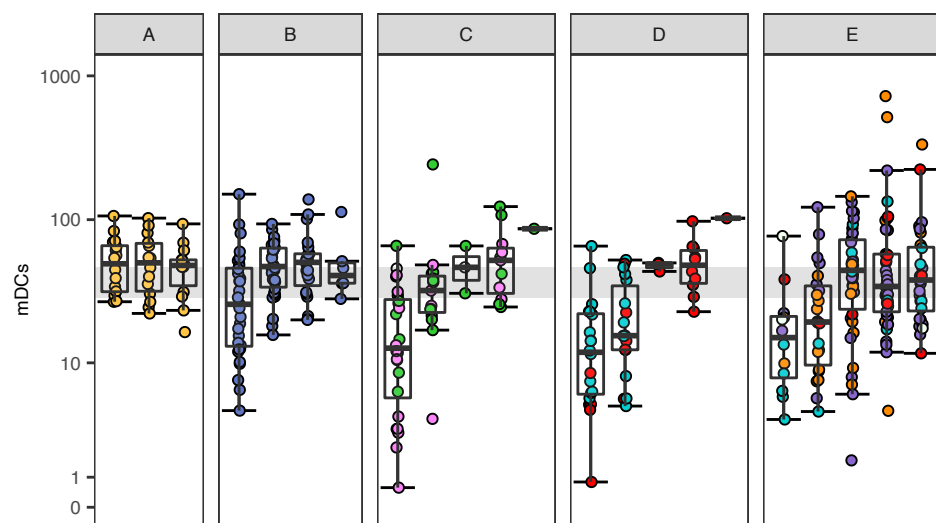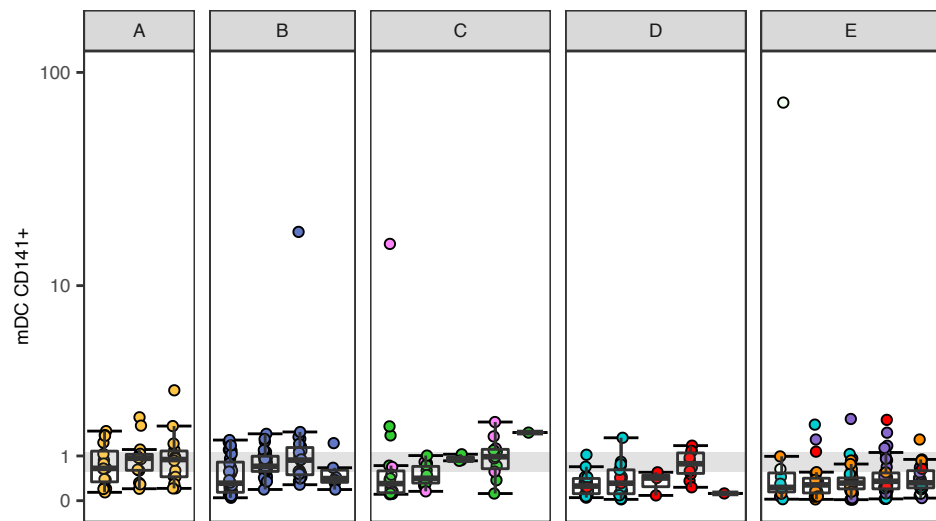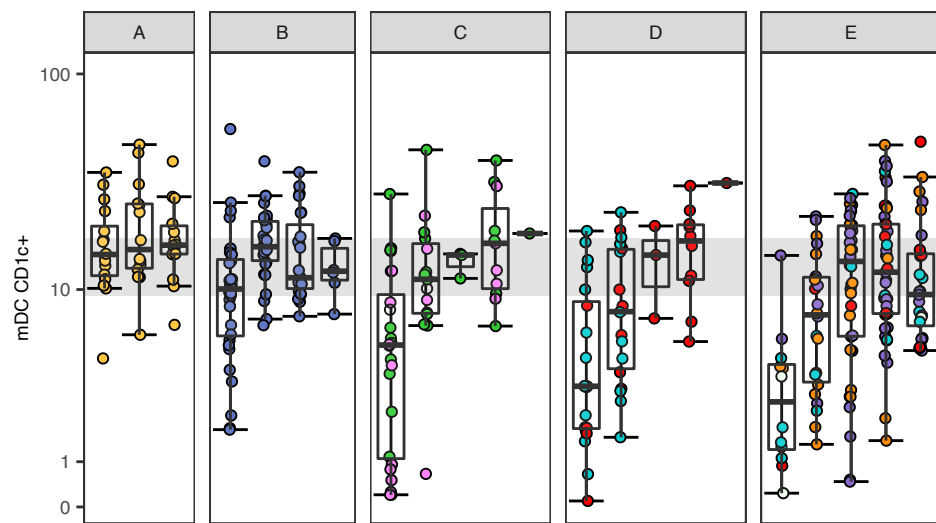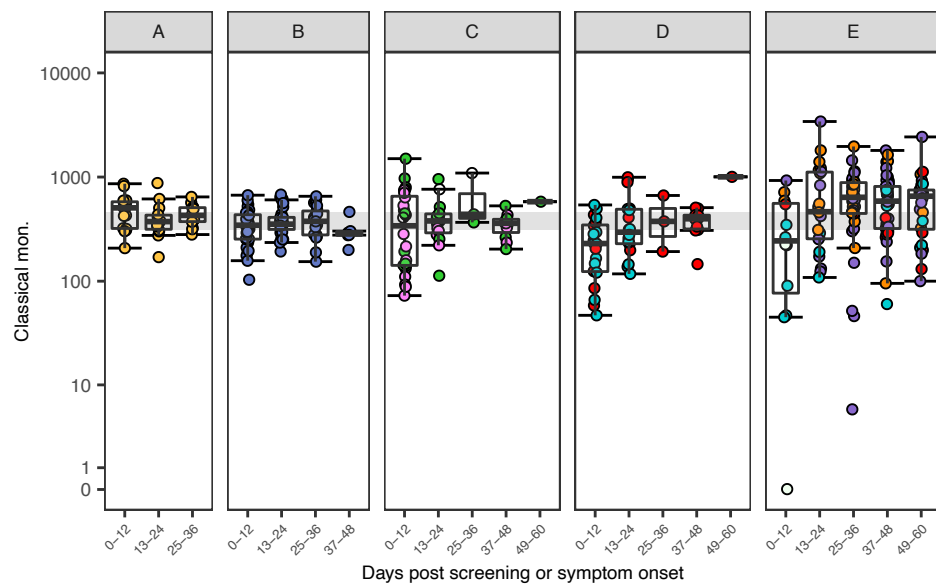

## mDCs

Likelihood ratio test: interaction uncorrected  $p = 0.00025$  (\*\*\*)

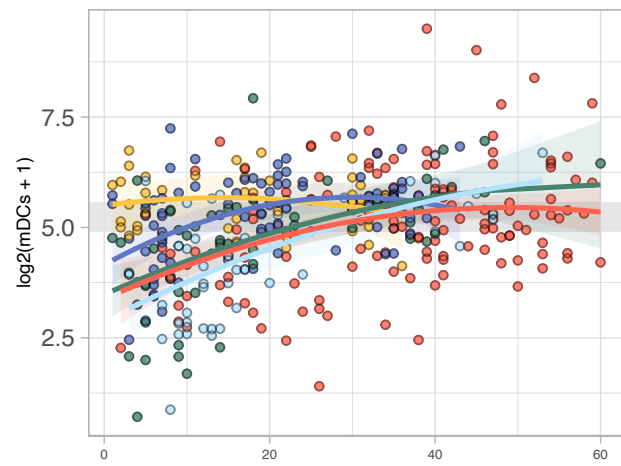

## mDC CD141+

Likelihood ratio test: interaction uncorrected  $p = 0.091$  (.)

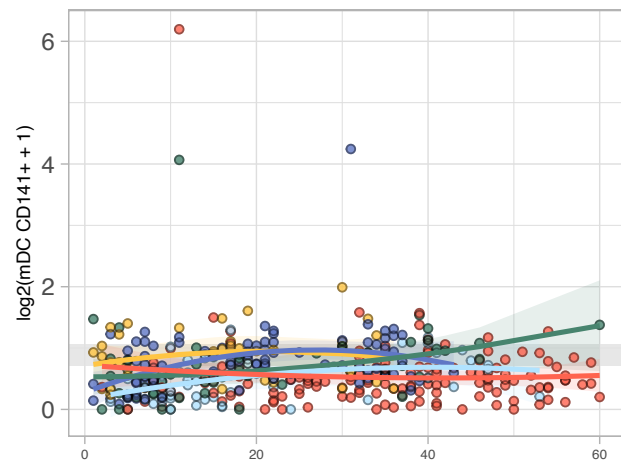

## mDC CD1c+

Likelihood ratio test: interaction uncorrected  $p = 0.00011$  (\*\*\*)

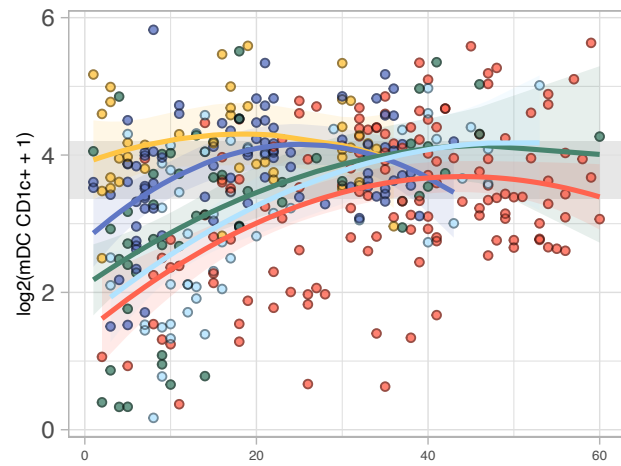

## Classical mon.

Likelihood ratio test: interaction uncorrected  $p = 0.074$  (.)

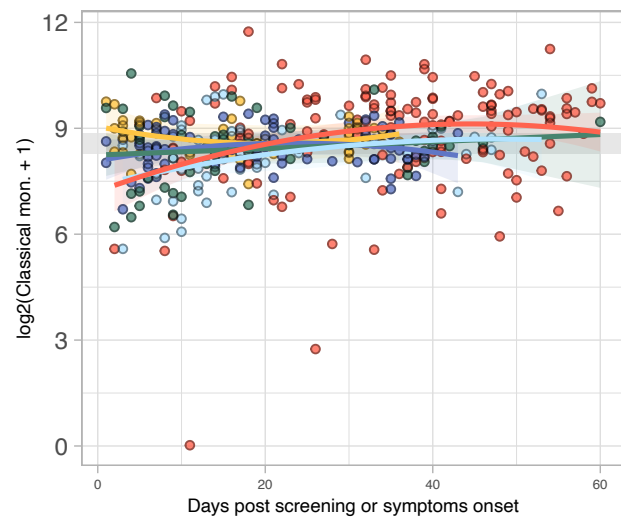

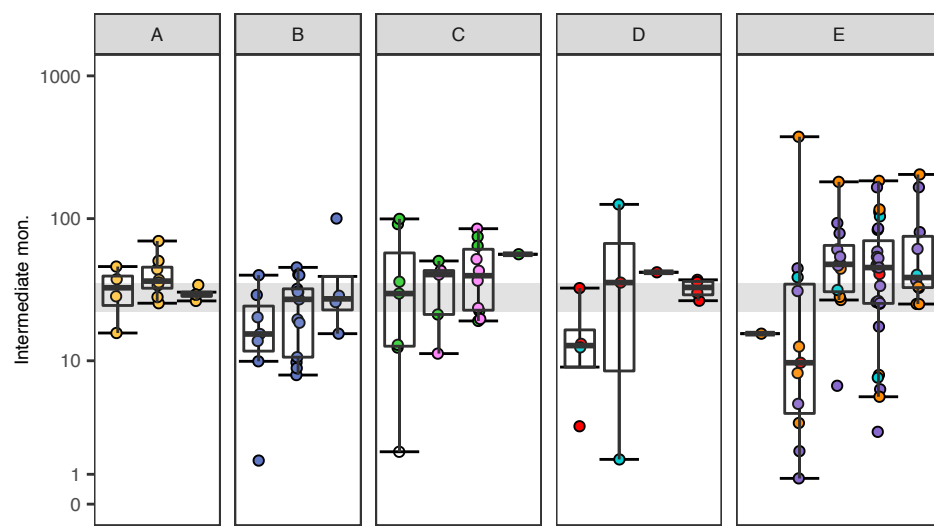

### Intermediate mon.

Likelihood ratio test: interaction uncorrected  $p = 0.48$

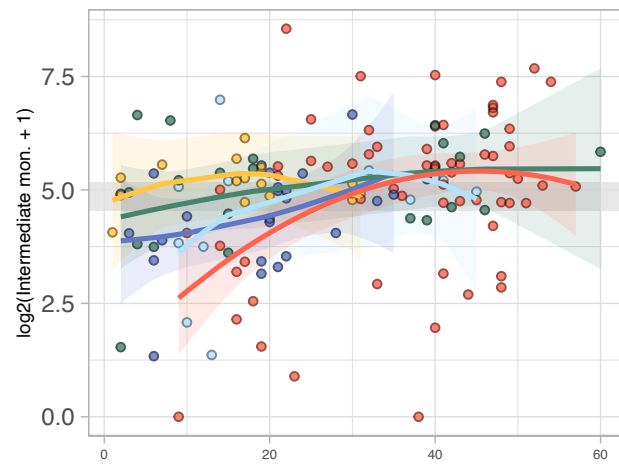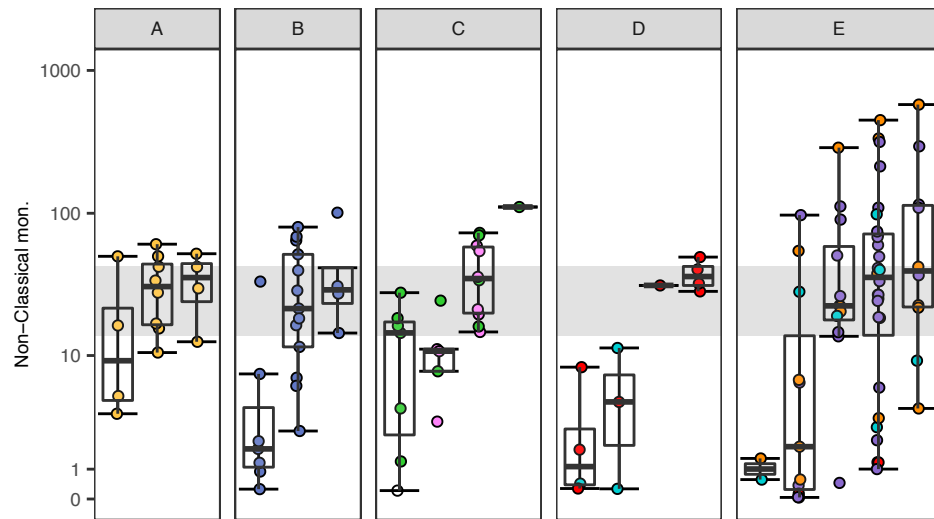

### Non-Classical mon.

Likelihood ratio test: interaction uncorrected  $p = 0.54$

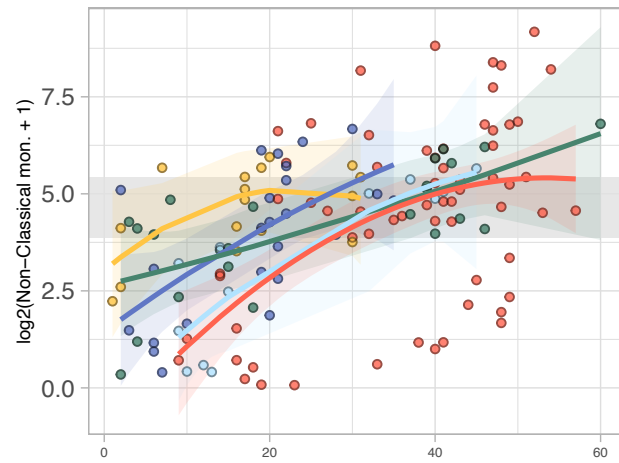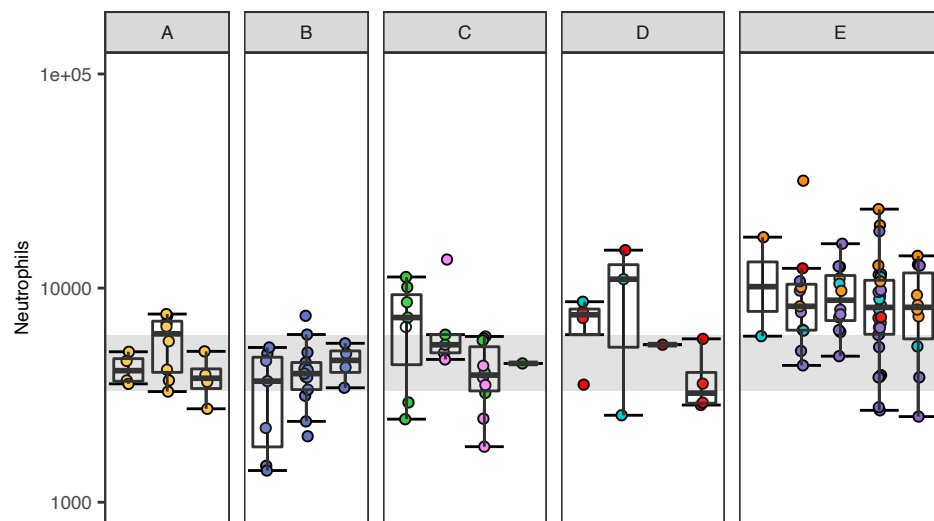

### Neutrophils

Likelihood ratio test: interaction uncorrected  $p = 0.18$

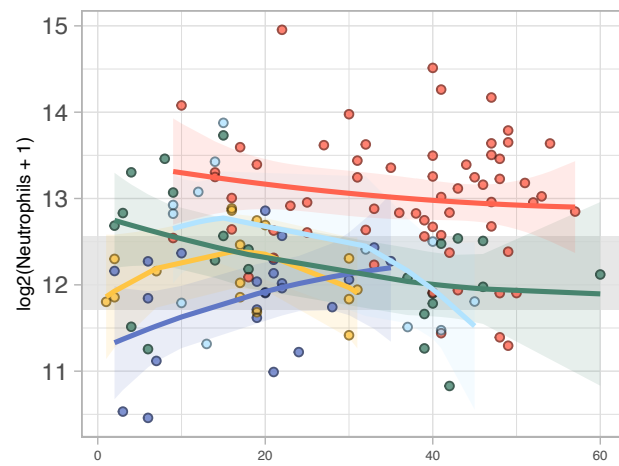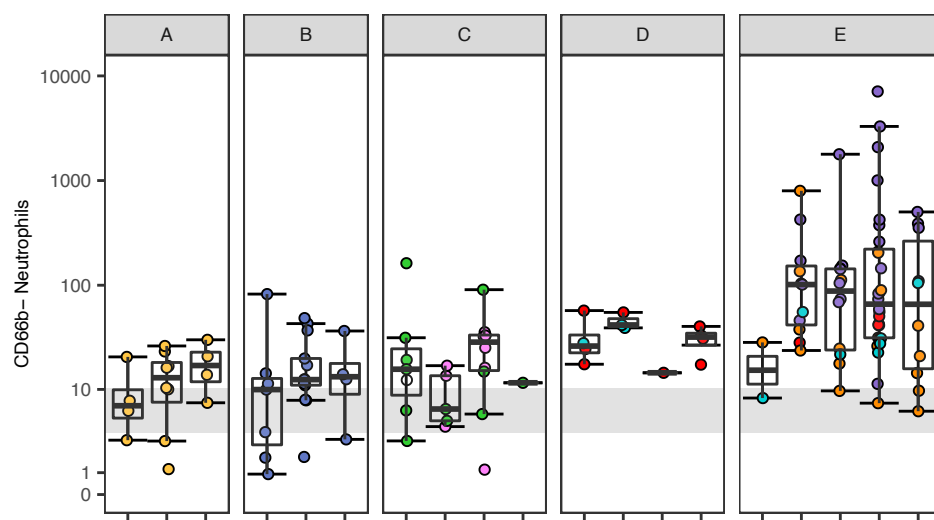

### CD66b- Neutrophils

Likelihood ratio test: interaction uncorrected  $p = 0.98$

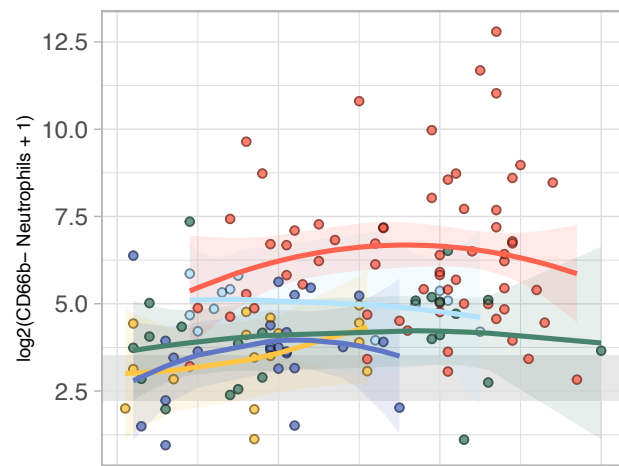

Days post screening or symptom onset

Days post screening or symptoms onset

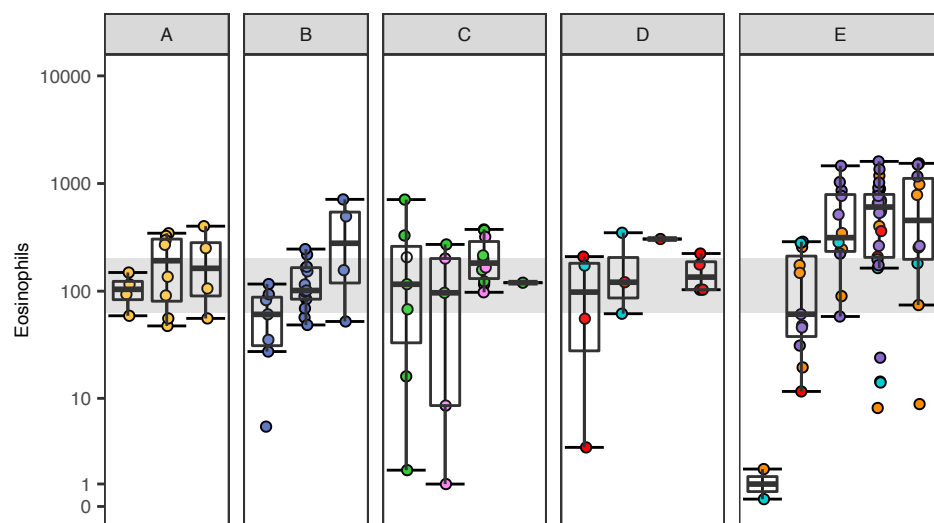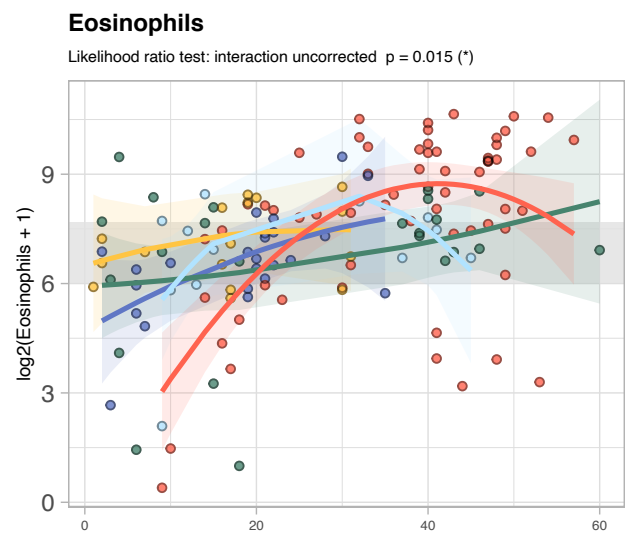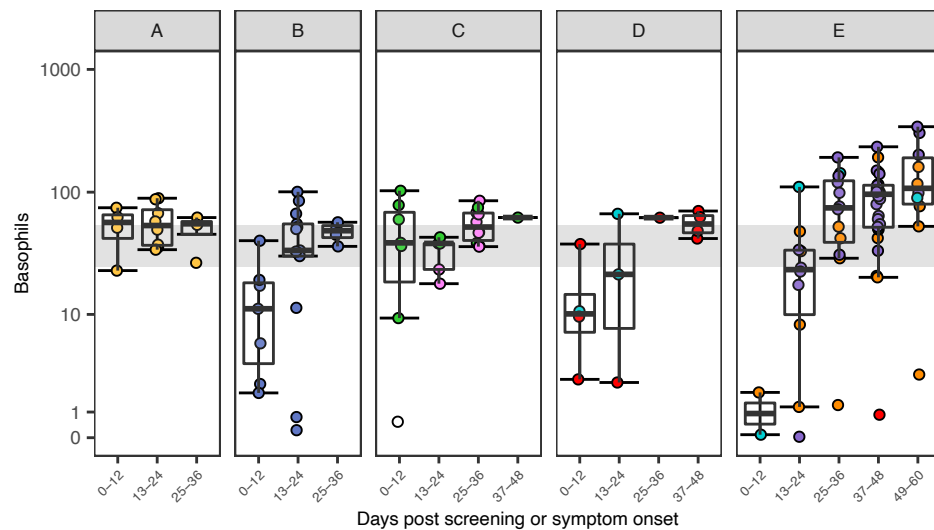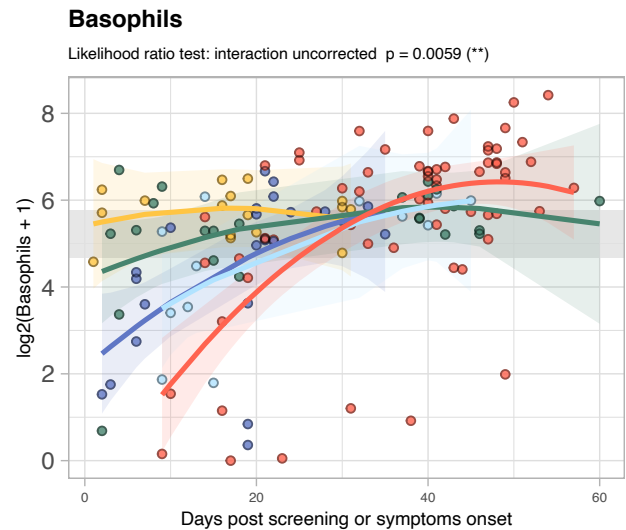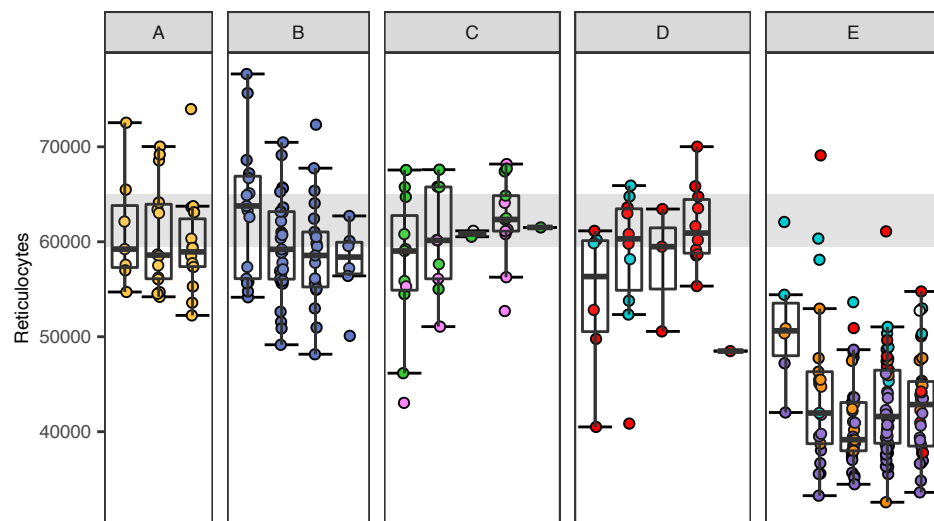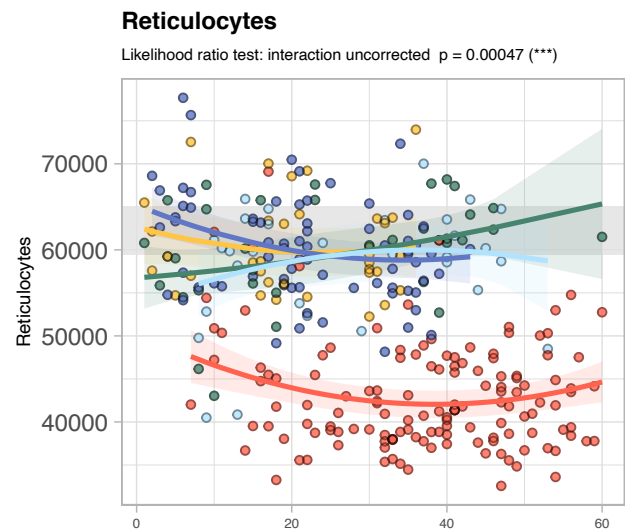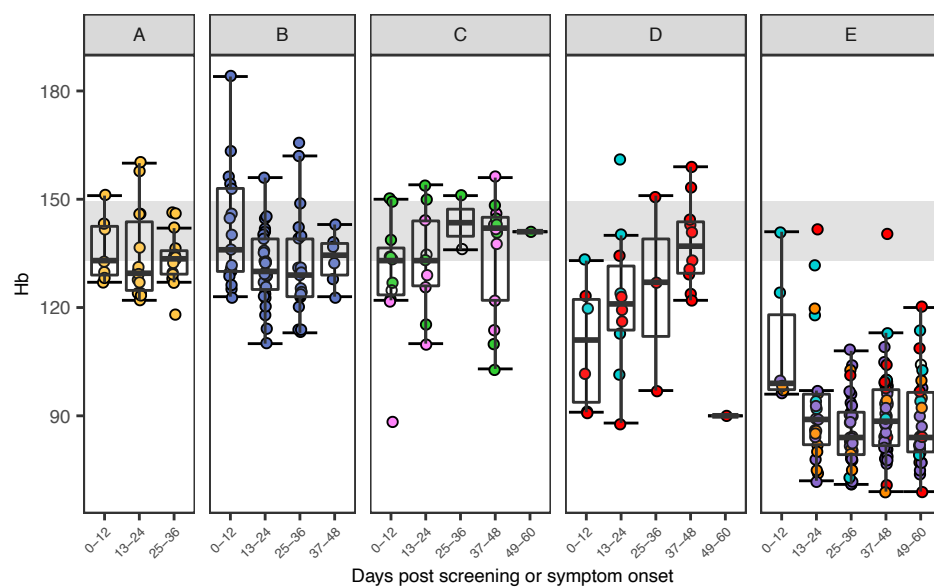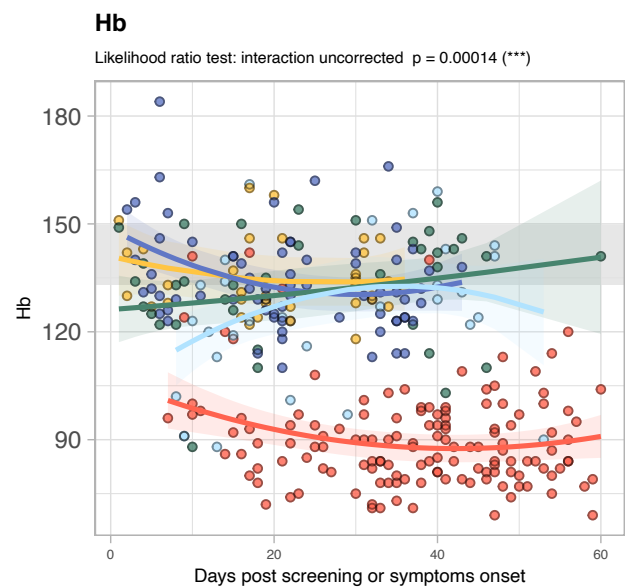

Supplement: Supplementary file [file media-5.zip]
