# Supplementary material for: Delayed bystander CD8 T cell activation, early immune pathology and persistent dysregulation characterise severe COVID-19
Source: bioRxiv or medRxiv preprint supplement (doi:10.1101/2021.01.11.20248765), 2021-03-26

Item S3: Differences between patients in cluster 1 and cluster 2 defined as figure 4A

A

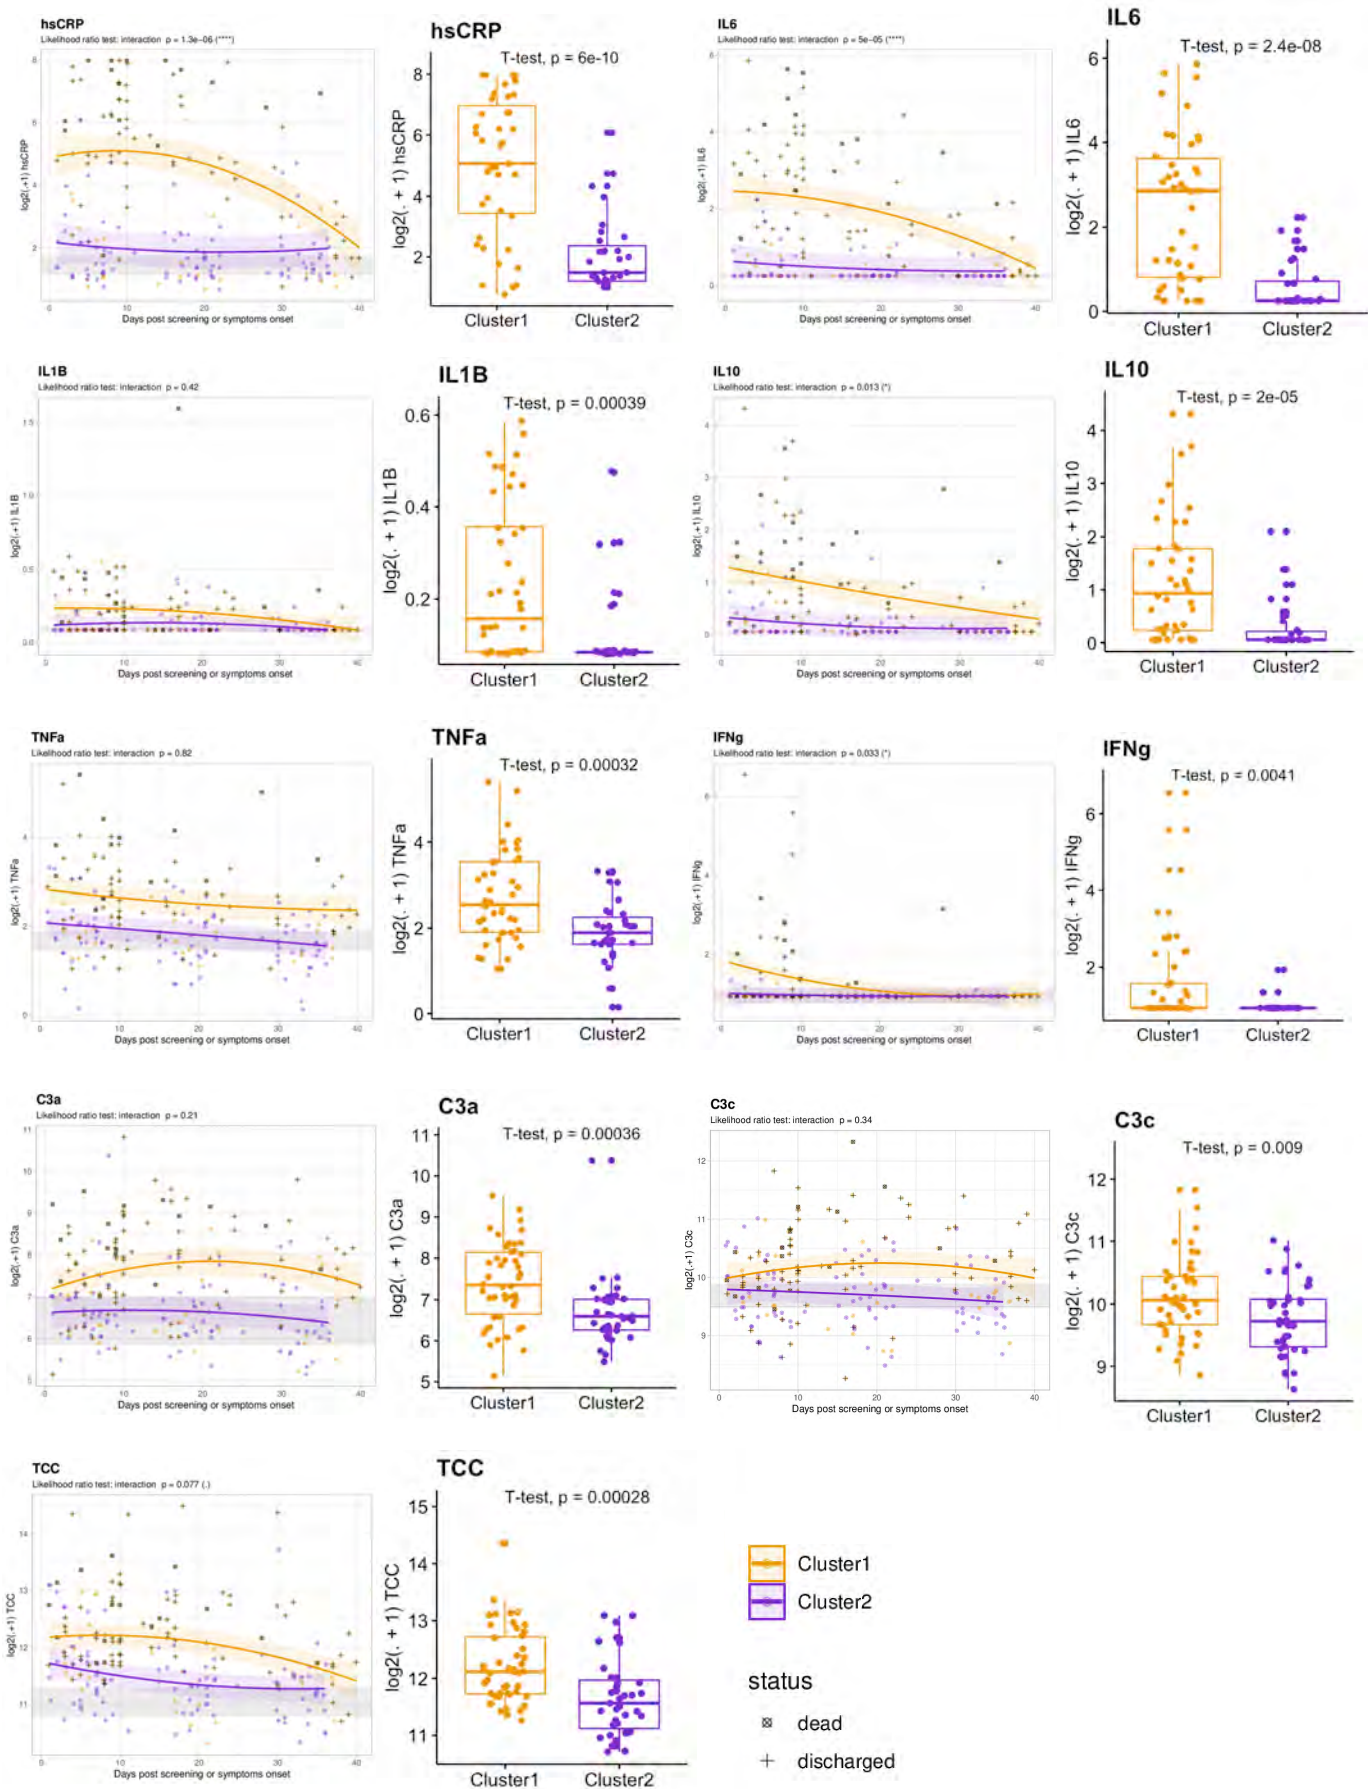

B

**CD4 Naive T**Likelihood ratio test: interaction  $p = 0.0012$ , adj.  $p = 0.006$  (\*\*)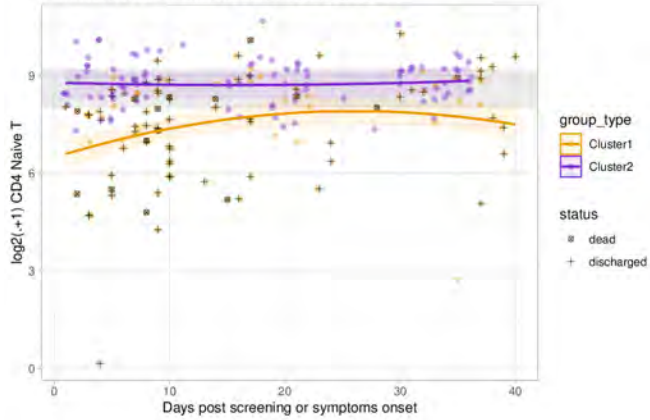**CD4 AE Effector**Likelihood ratio test: interaction  $p = 0.51$ , adj.  $p = 0.54$ 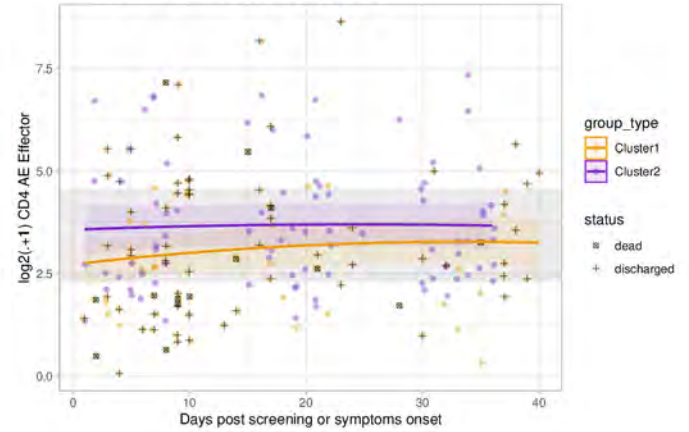**CD4 CM T**Likelihood ratio test: interaction  $p = 0.0039$ , adj.  $p = 0.012$  (\*)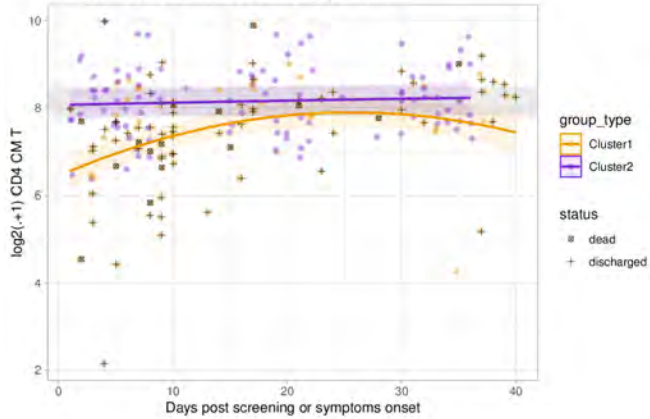**CD4 AE Tscm**Likelihood ratio test: interaction  $p = 0.038$ , adj.  $p = 0.066$  (.)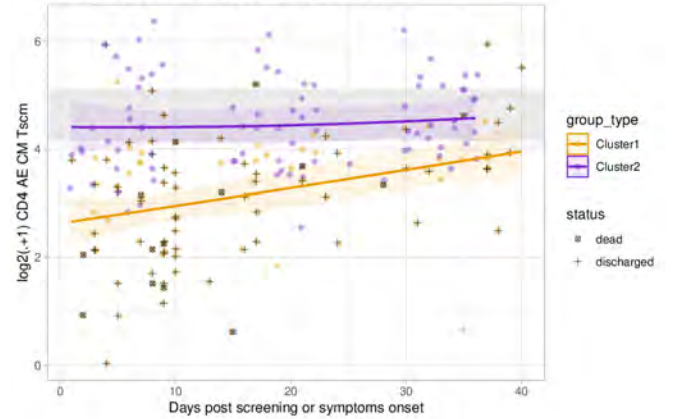**CD4 AE CM Tscm**Likelihood ratio test: interaction  $p = 0.038$ , adj.  $p = 0.066$  (.)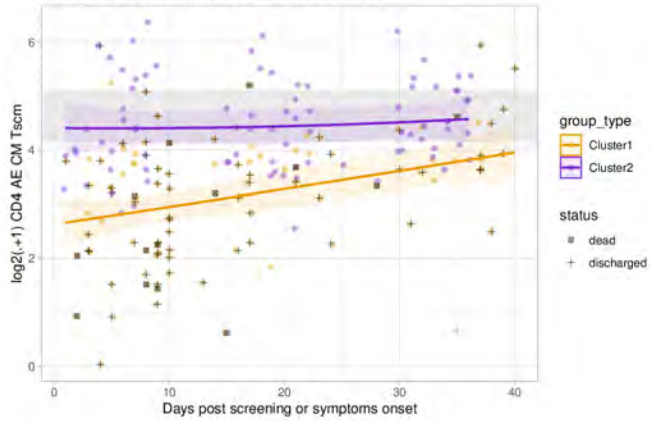**CD4 EMRA T**Likelihood ratio test: interaction  $p = 0.0042$ , adj.  $p = 0.012$  (\*)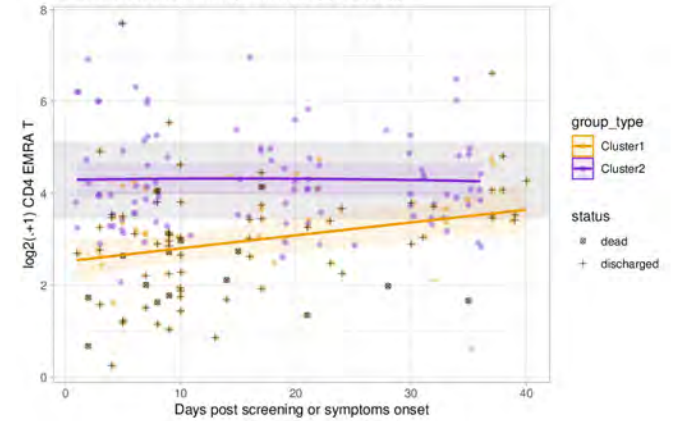**CD4 Total HLA-DR+CD38+ T**Likelihood ratio test: interaction  $p = 0.012$ , adj.  $p = 0.027$  (\*)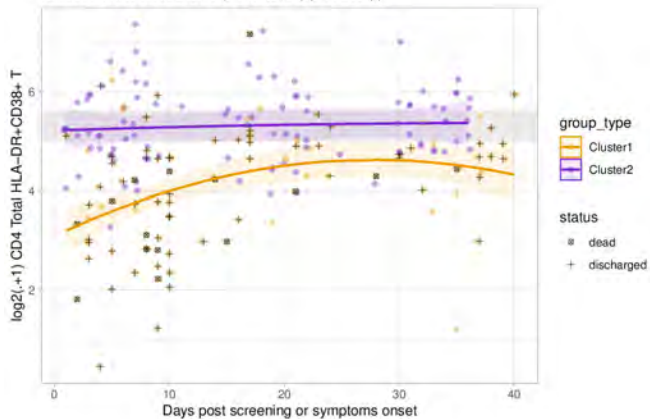**CD4 CM HLA-DR+CD38+ T**Likelihood ratio test: interaction  $p = 0.00072$ , adj.  $p = 0.0049$  (\*\*)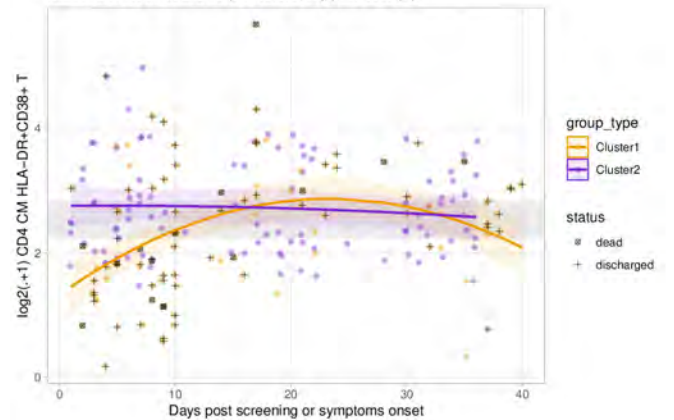



### CD4 EM HLA-DR+CD38+ T

Likelihood ratio test: interaction  $p = 0.0017$ , adj.  $p = 0.0076$  (\*\*)

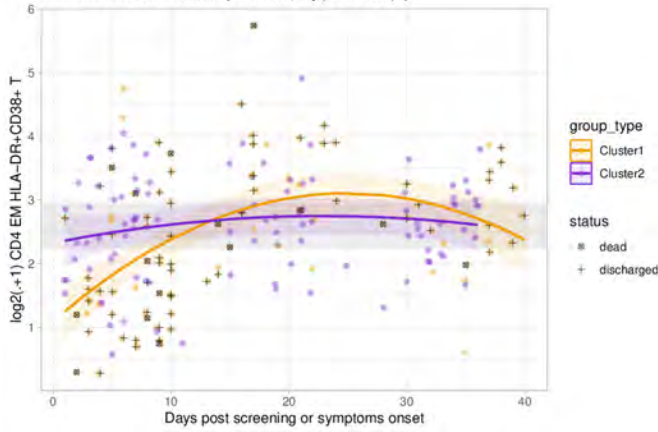

### CD4 EMRA HLA-DR+CD38+ T

Likelihood ratio test: interaction  $p = 0.18$ , adj.  $p = 0.23$

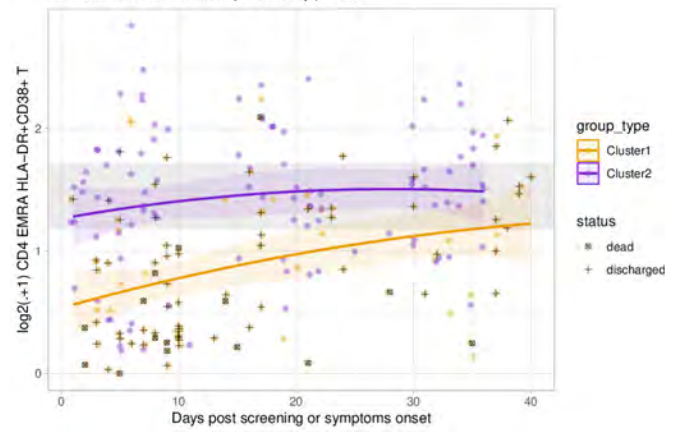

### CD4 Non-naïve HLA-DR+CD38+ T

Likelihood ratio test: interaction  $p = 0.00038$ , adj.  $p = 0.0038$  (\*\*)

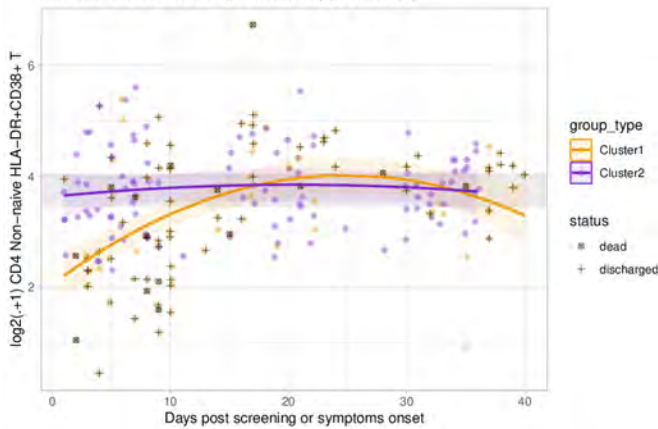

### CD4 Tfh-like

Likelihood ratio test: interaction  $p = 0.018$ , adj.  $p = 0.035$  (\*)

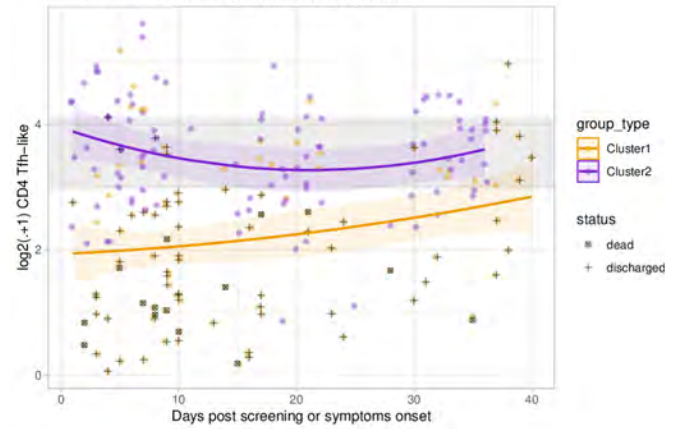

### Treg

Likelihood ratio test: interaction  $p = 0.00025$ , adj.  $p = 0.0037$  (\*\*)

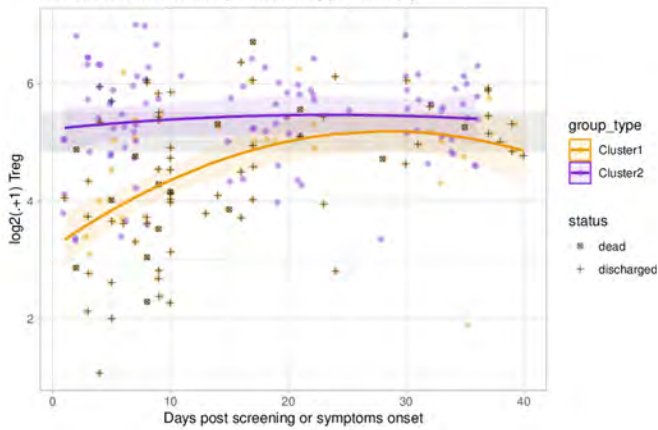

### Treg HLA-DR+

Likelihood ratio test: interaction  $p = 0.002$ , adj.  $p = 0.0076$  (\*\*)

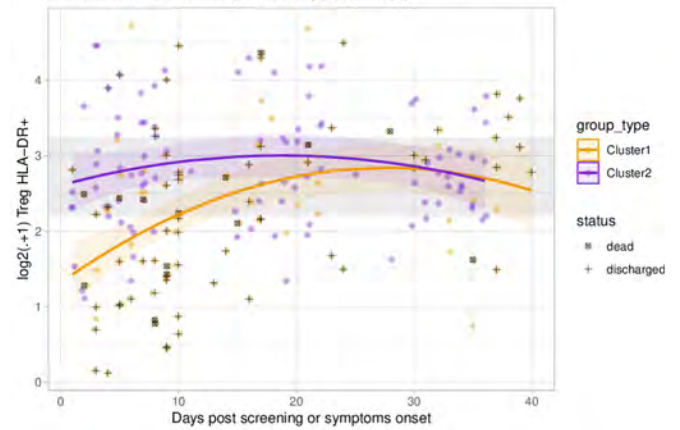

### Treg Helios+

Likelihood ratio test: interaction  $p = 0.0018$ , adj.  $p = 0.0076$  (\*\*)

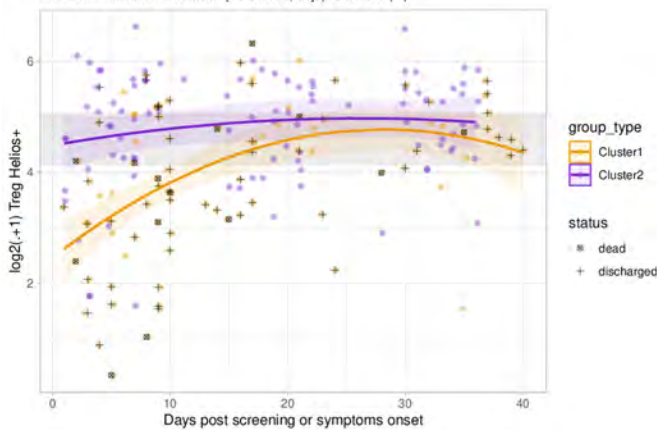

### CD4 CCR6+

Likelihood ratio test: interaction  $p = 0.0062$ , adj.  $p = 0.016$  (\*)

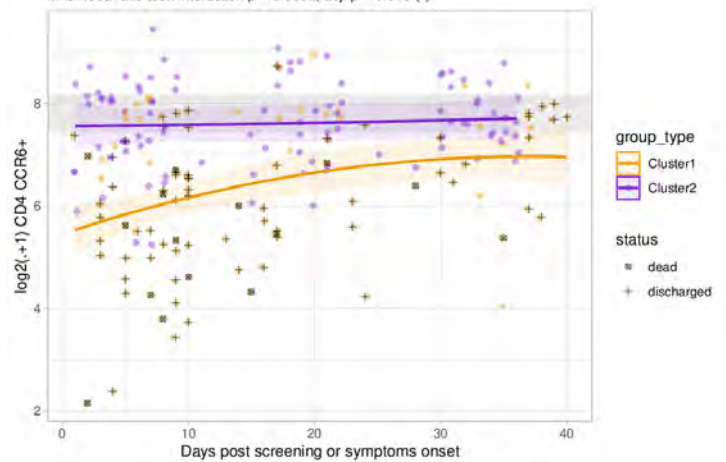

**CD4 CD161+**Likelihood ratio test: interaction  $p = 0.00059$ , adj.  $p = 0.0048$  (\*\*)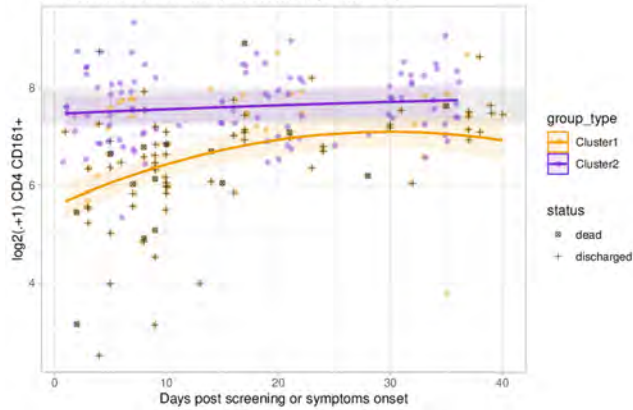**CD4 CRTh2+**Likelihood ratio test: interaction  $p = 0.00038$ , adj.  $p = 0.0038$  (\*\*)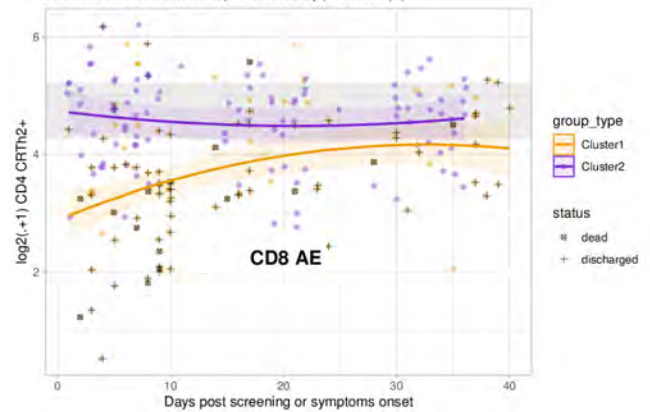**CD8 Naive T**Likelihood ratio test: interaction  $p = 0.013$ , adj.  $p = 0.027$  (\*)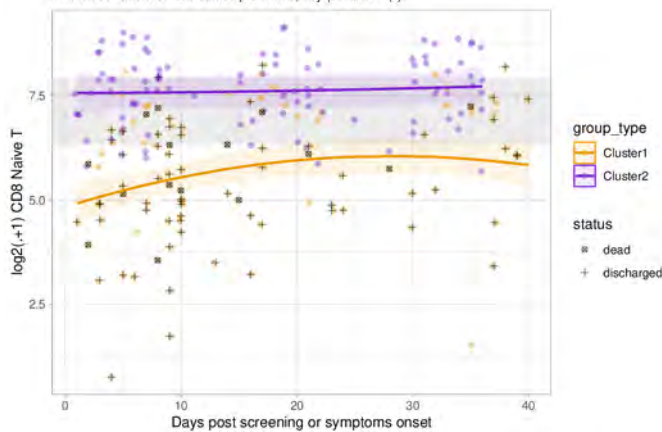**CD8 AE Effector**Likelihood ratio test: interaction  $p = 0.017$ , adj.  $p = 0.034$  (\*)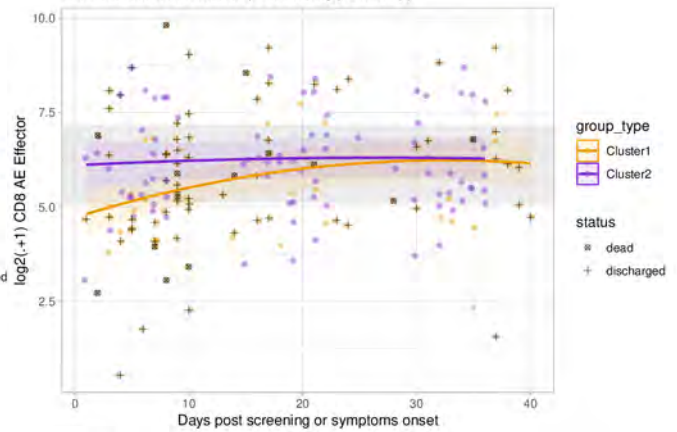**CD8 CM T**Likelihood ratio test: interaction  $p = 0.027$ , adj.  $p = 0.048$  (\*)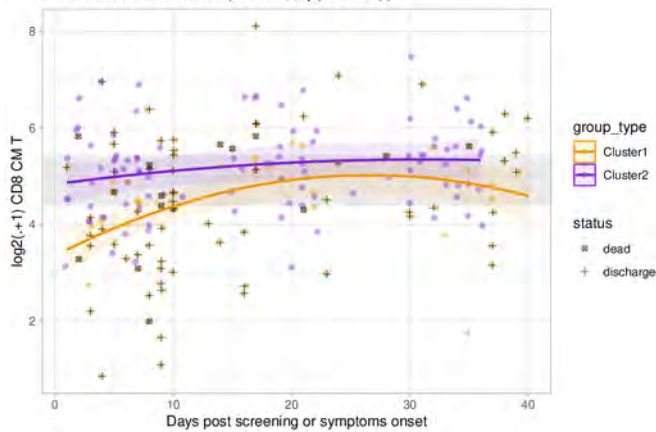**CD8 AE Tscm**Likelihood ratio test: interaction  $p = 0.086$ , adj.  $p = 0.12$ 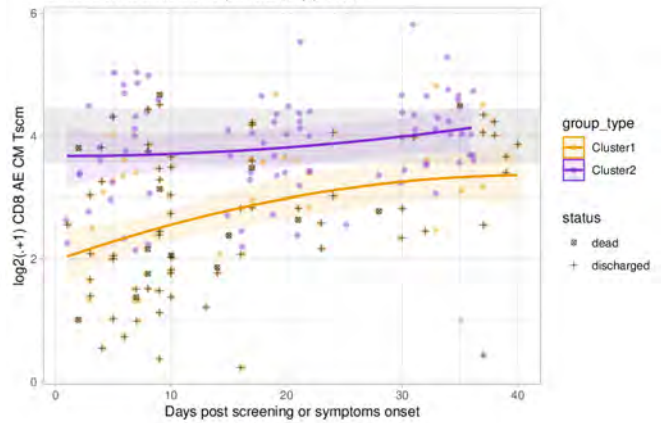**CD8 EM T**Likelihood ratio test: interaction  $p = 0.00015$ , adj.  $p = 0.0034$  (\*\*)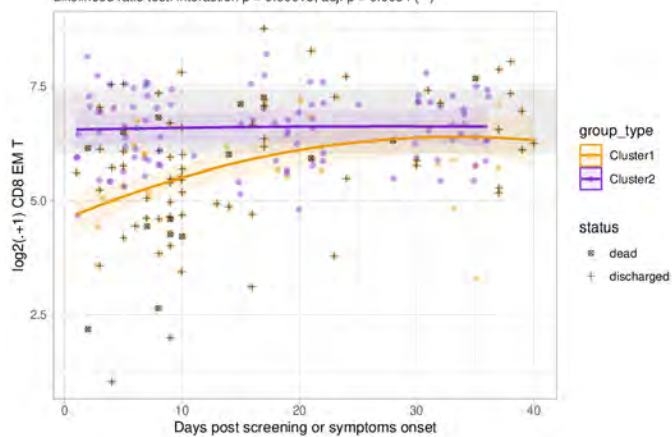**CD8 EMRA T**Likelihood ratio test: interaction  $p = 0.002$ , adj.  $p = 0.0076$  (\*\*)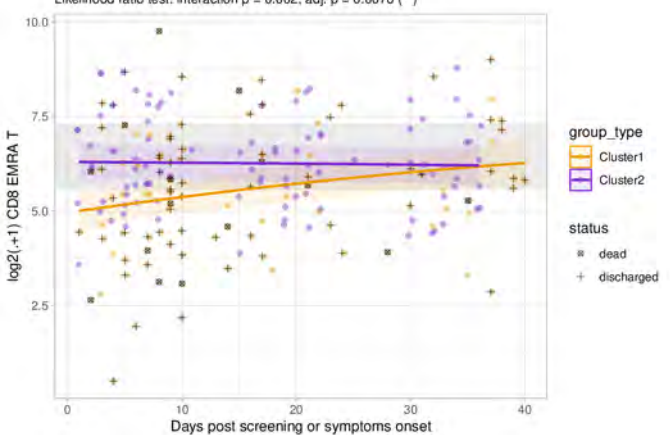



### CD8 Total HLA-DR+CD38+ T

Likelihood ratio test: interaction  $p = 0.012$ , adj.  $p = 0.027$  (\*)

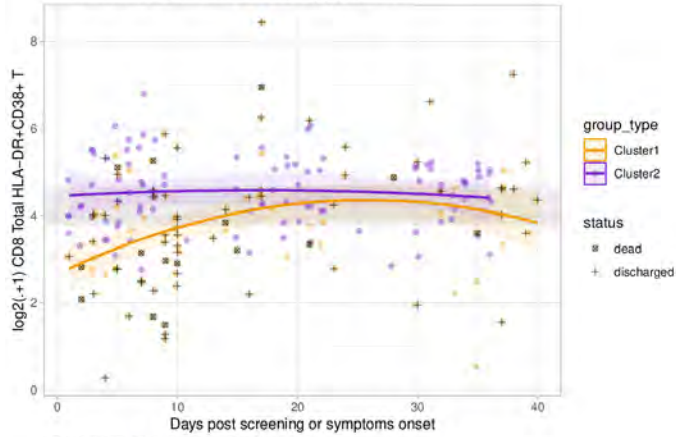

### CD8 CM HLA-DR+CD38+ T

Likelihood ratio test: interaction  $p = 0.011$ , adj.  $p = 0.027$  (\*)

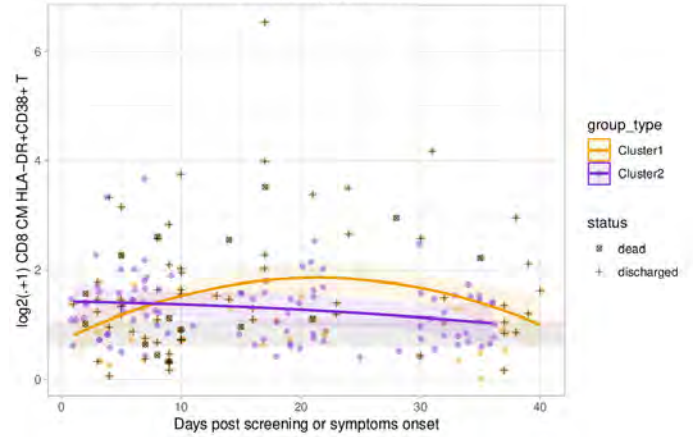

### CD8 EM HLA-DR+CD38+ T

Likelihood ratio test: interaction  $p = 6.7e-05$ , adj.  $p = 0.0034$  (\*\*)

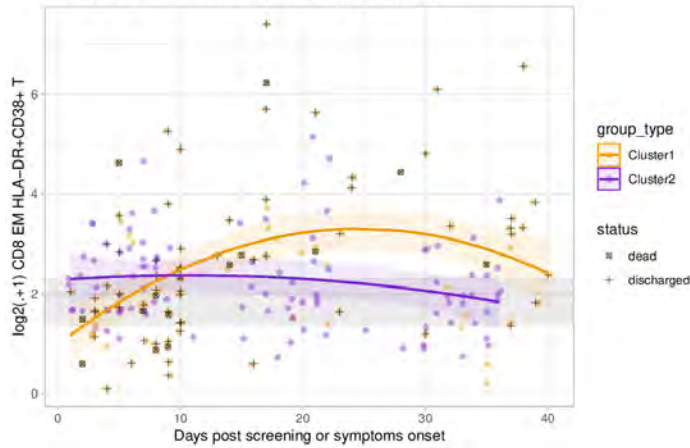

### CD8 EMRA HLA-DR+CD38+ T

Likelihood ratio test: interaction  $p = 0.026$ , adj.  $p = 0.048$  (\*)

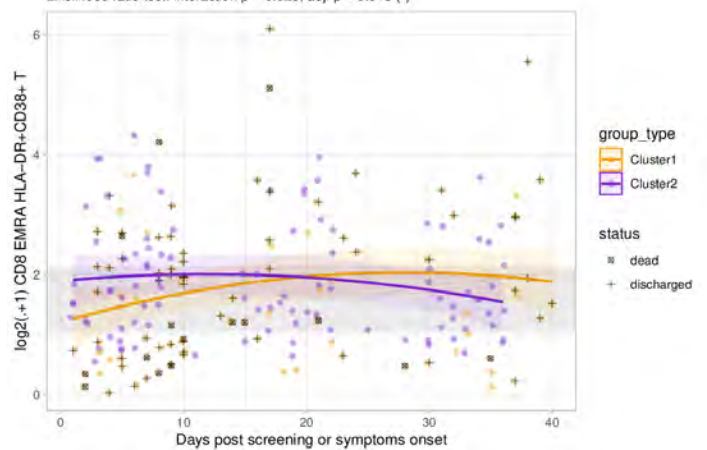

### CD8 Non-naïve HLA-DR+CD38+ T

Likelihood ratio test: interaction  $p = 0.00041$ , adj.  $p = 0.0038$  (\*\*)

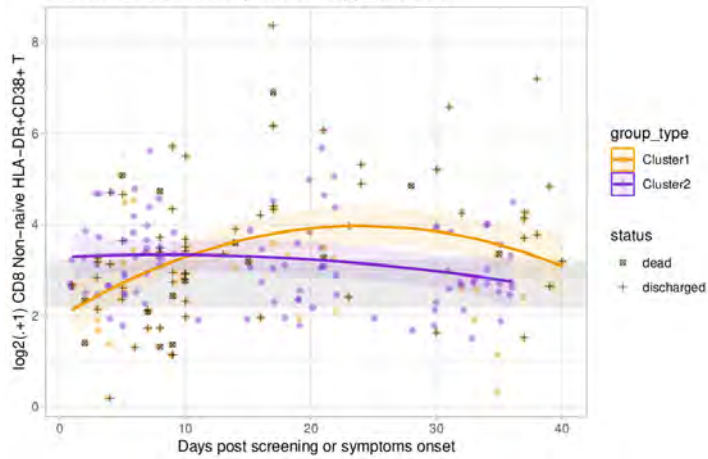

### CD8 CD161+

Likelihood ratio test: interaction  $p = 0.0019$ , adj.  $p = 0.0076$  (\*\*)

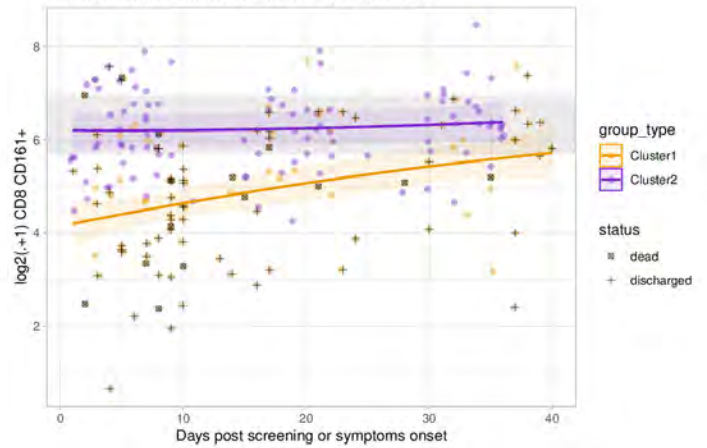

### CD8 CXCR5+

Likelihood ratio test: interaction  $p = 0.0052$ , adj.  $p = 0.014$  (\*)

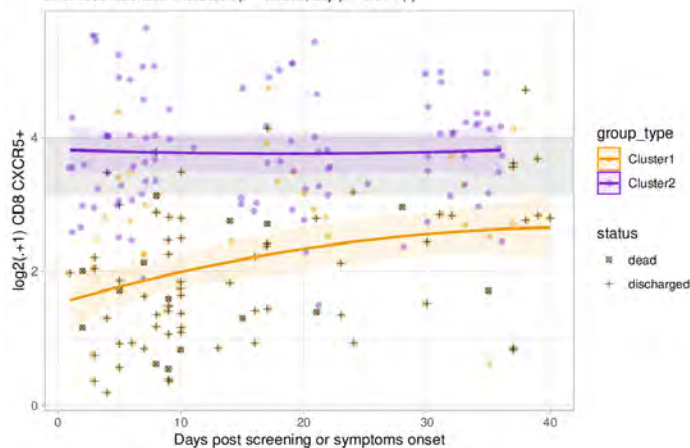

### CD8 CRTh2+

Likelihood ratio test: interaction  $p = 0.0026$ , adj.  $p = 0.0088$  (\*\*)

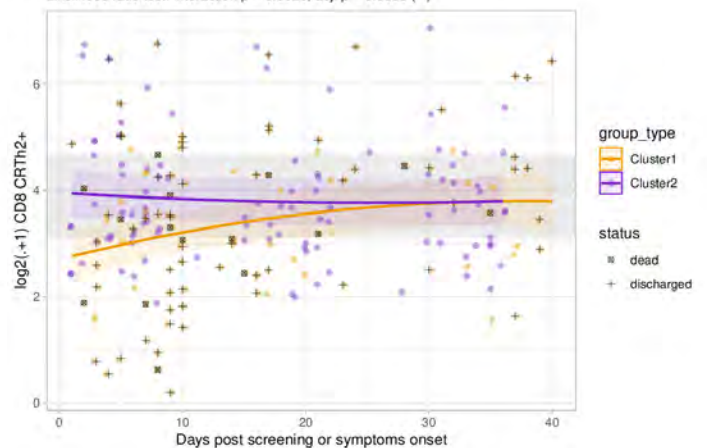

### Eosinophils

Likelihood ratio test: interaction  $p = 0.24$ , adj.  $p = 0.29$

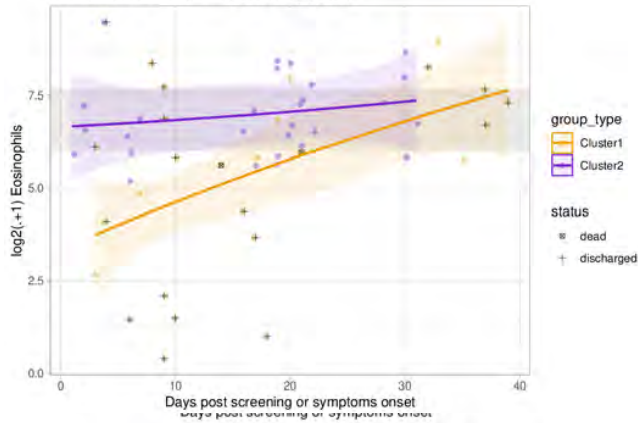

### CD8 MPEC (KLRG1- CD127+)

Likelihood ratio test: interaction  $p = 0.0012$ , adj.  $p = 0.006$  (\*\*)

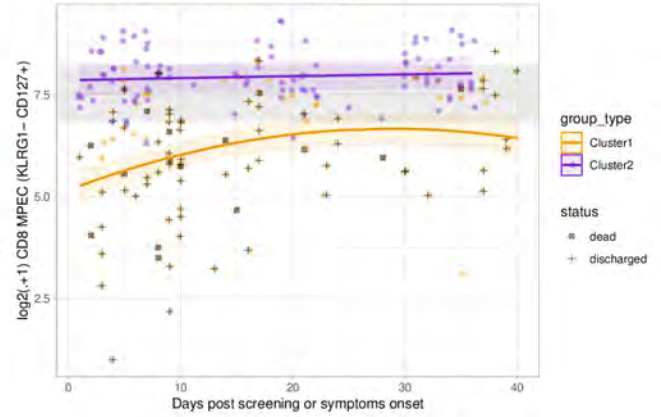

### CD8 DPEC (KLRG1+ CD127+)

Likelihood ratio test: interaction  $p = 0.0041$ , adj.  $p = 0.012$  (\*)

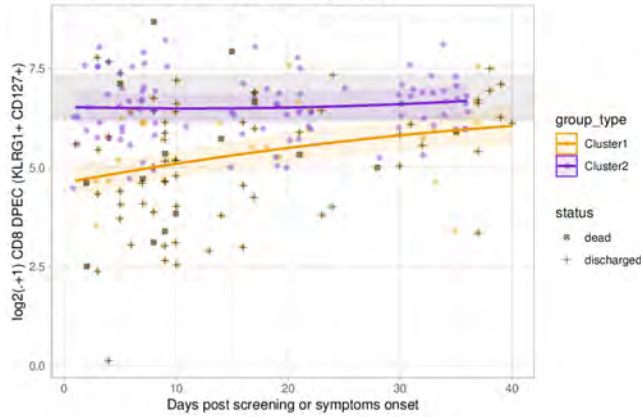

### CD8 SLEC (KLRG1+ CD127-)

Likelihood ratio test: interaction  $p = 0.00081$ , adj.  $p = 0.005$  (\*\*)

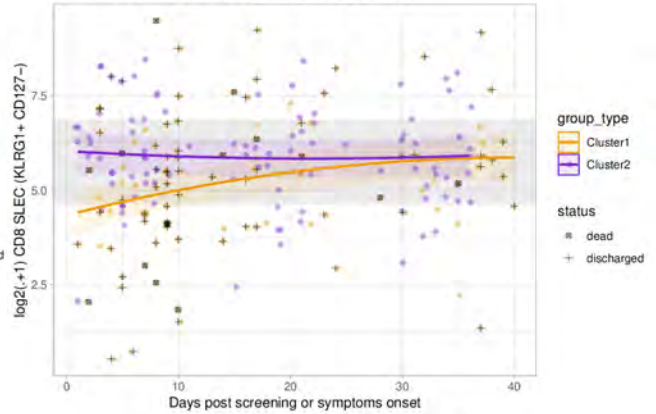

### CD8 EEC (KLRG1- CD127-)

Likelihood ratio test: interaction  $p = 0.0069$ , adj.  $p = 0.017$  (\*)

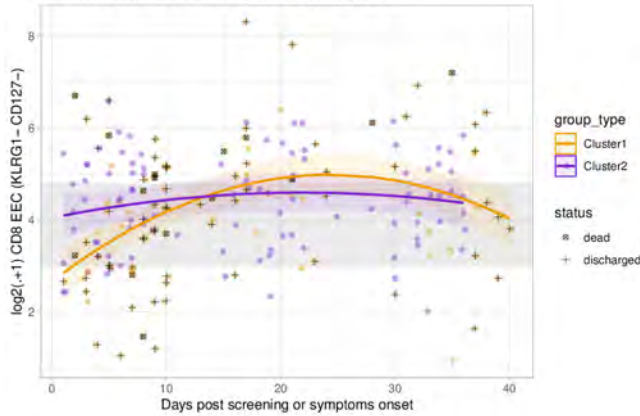

### gdT

Likelihood ratio test: interaction  $p = 0.0083$ , adj.  $p = 0.02$  (\*)

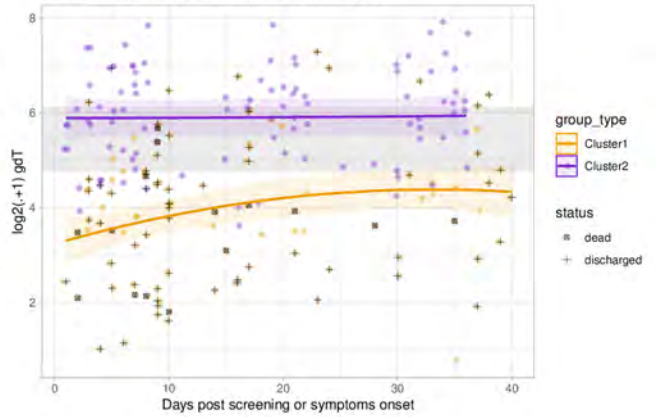

### Vg9Vd2(hi) gd T

Likelihood ratio test: interaction  $p = 0.003$ , adj.  $p = 0.0096$  (\*\*)

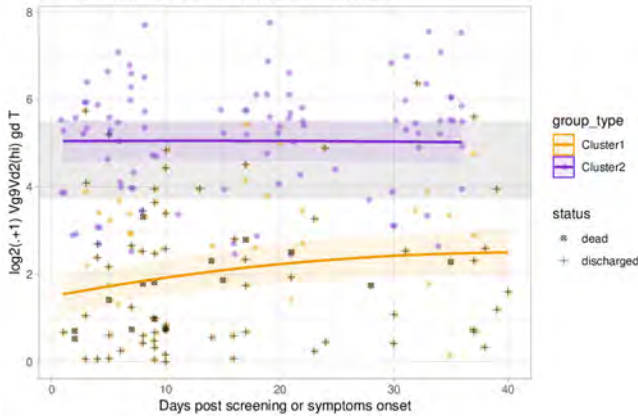

### Vg9Vd2(lo) gd T

Likelihood ratio test: interaction  $p = 0.042$ , adj.  $p = 0.069$  (.)

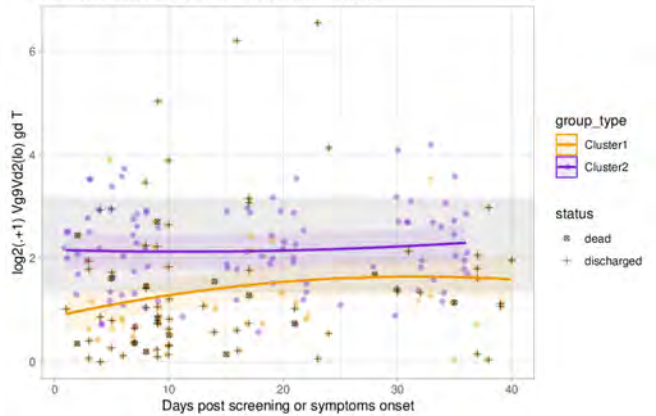



### MAIT

Likelihood ratio test: interaction  $p = 0.053$ , adj.  $p = 0.08$  (.)

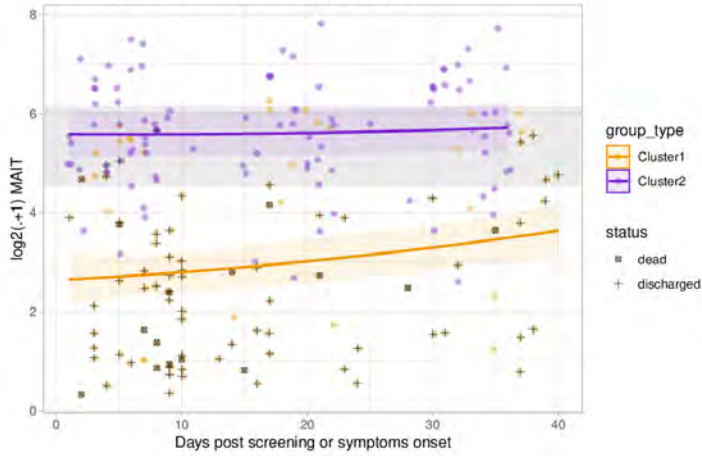

### CD4 MAIT

Likelihood ratio test: interaction  $p = 0.25$ , adj.  $p = 0.3$

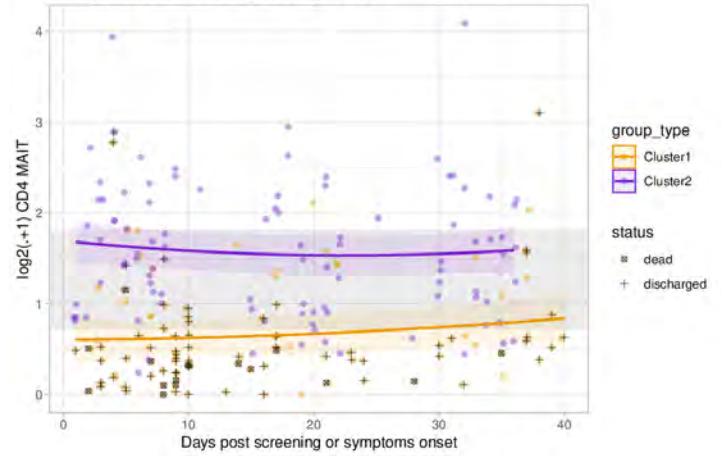

### CD8 MAIT

Likelihood ratio test: interaction  $p = 0.053$ , adj.  $p = 0.08$  (.)

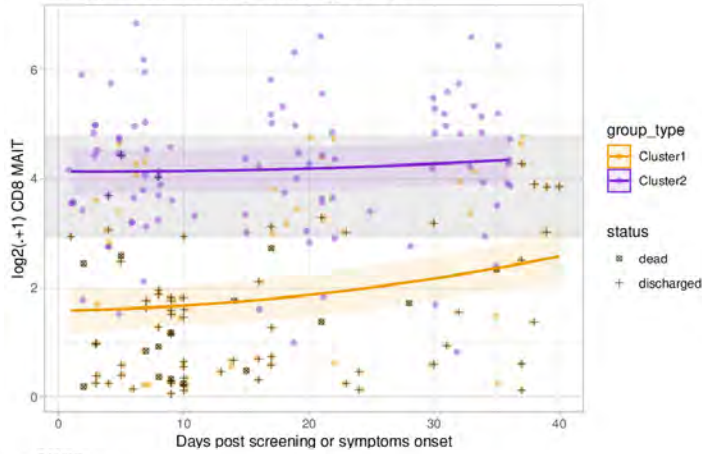

### Vb11+ abT

Likelihood ratio test: interaction  $p = 0.00018$ , adj.  $p = 0.0034$  (\*\*)

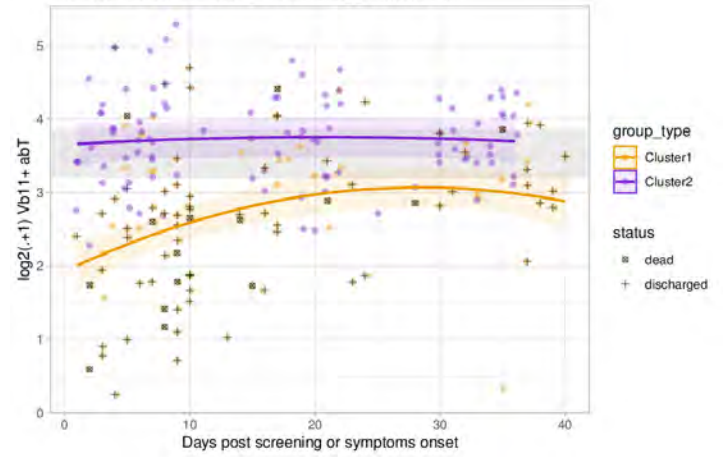

### NKT

Likelihood ratio test: interaction  $p = 0.022$ , adj.  $p = 0.043$  (\*)

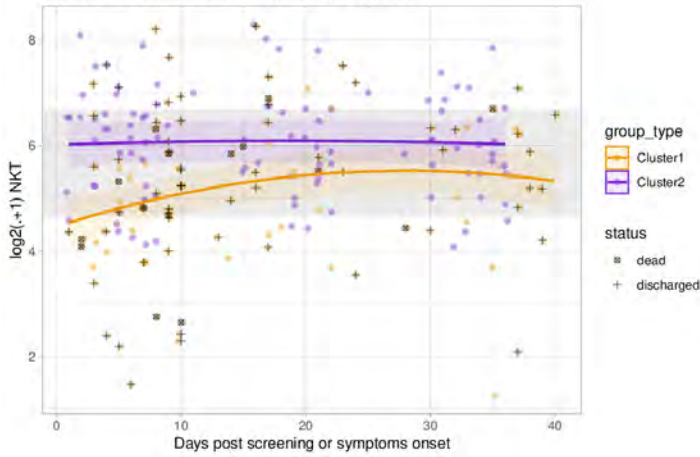

### NK

Likelihood ratio test: interaction  $p = 0.0022$ , adj.  $p = 0.0078$  (\*\*)

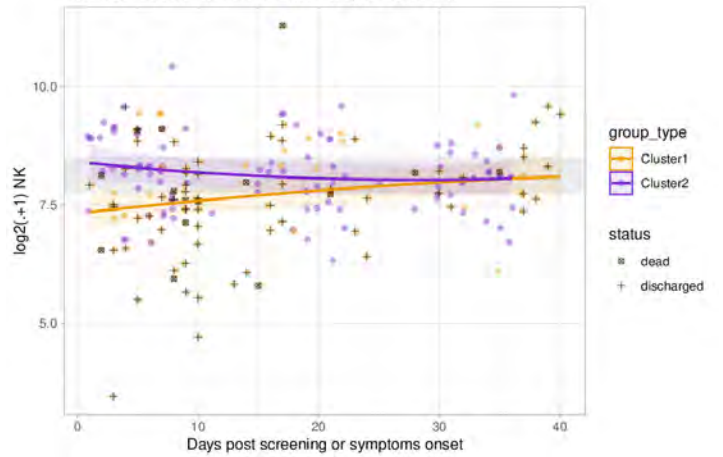

### NK CD16hi

Likelihood ratio test: interaction  $p = 0.00018$ , adj.  $p = 0.0034$  (\*\*)

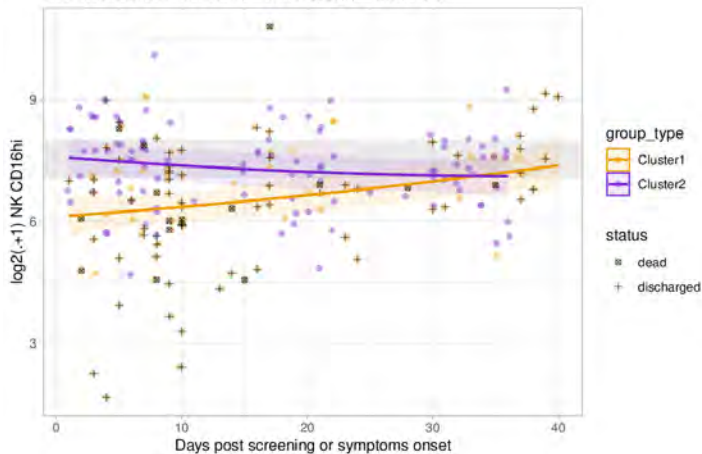

### NK CD56hi

Likelihood ratio test: interaction  $p = 0.047$ , adj.  $p = 0.074$  (.)

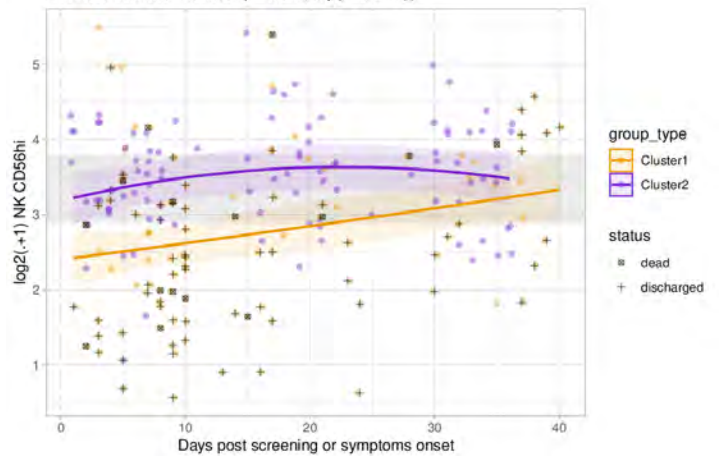

### mDCs

Likelihood ratio test: interaction  $p = 7e-04$ , adj.  $p = 0.0049$  (\*\*)

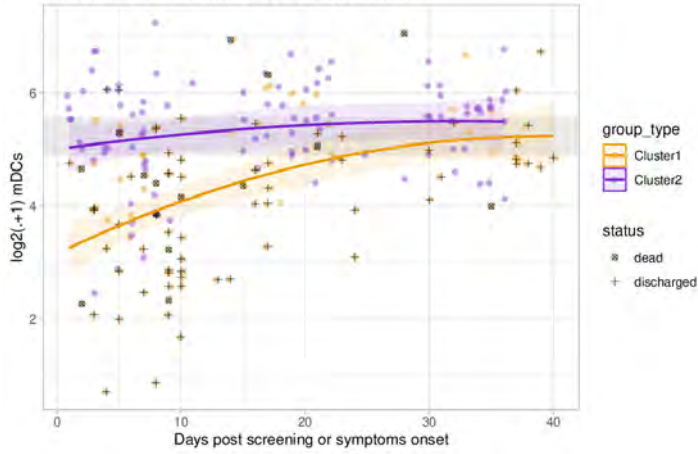

### mDC CD141+

Likelihood ratio test: interaction  $p = 0.91$ , adj.  $p = 0.91$

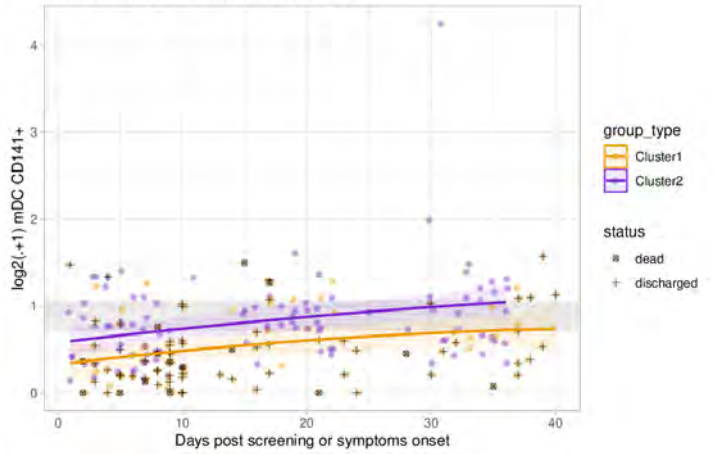

### mDC CD1c+

Likelihood ratio test: interaction  $p = 0.0089$ , adj.  $p = 0.021$  (\*)

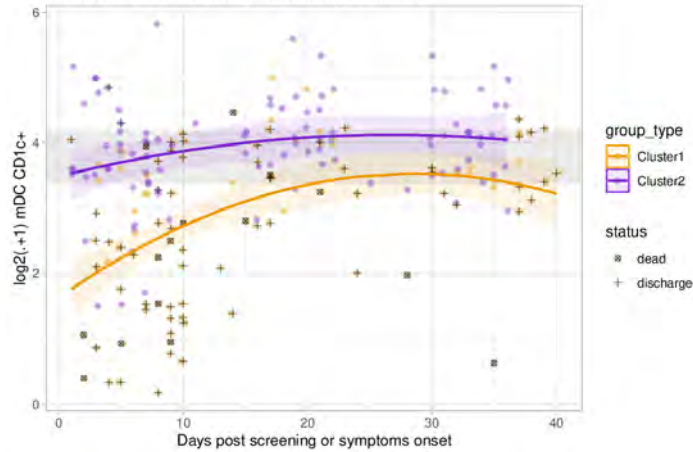

### Classical mon.

Likelihood ratio test: interaction  $p = 0.074$ , adj.  $p = 0.11$

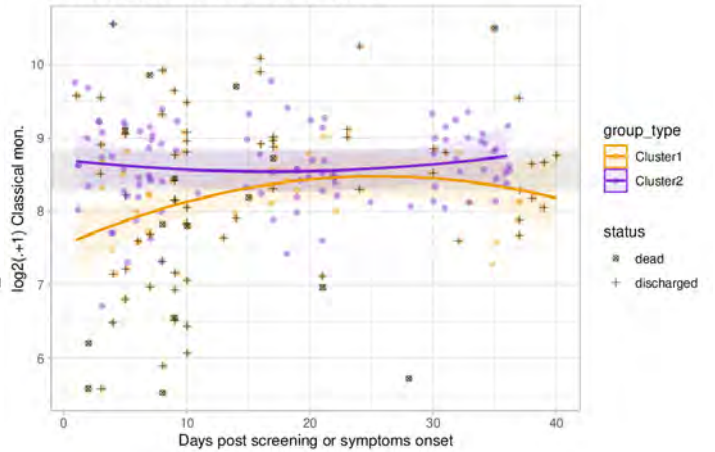

### Intermediate mon.

Likelihood ratio test: interaction  $p = 0.41$ , adj.  $p = 0.44$

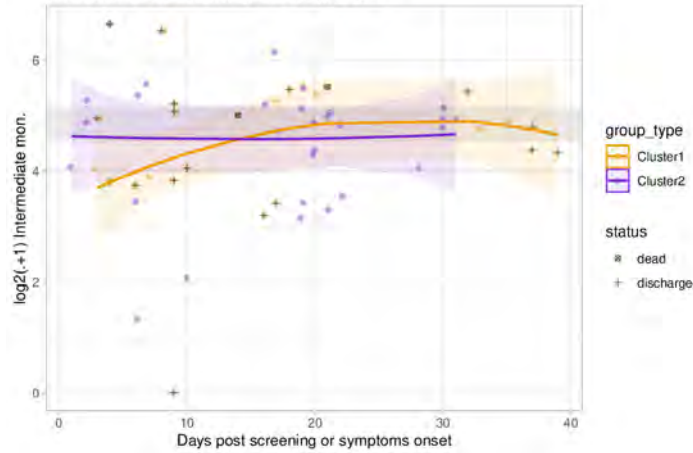

### Non-Classical mon.

Likelihood ratio test: interaction  $p = 0.39$ , adj.  $p = 0.43$

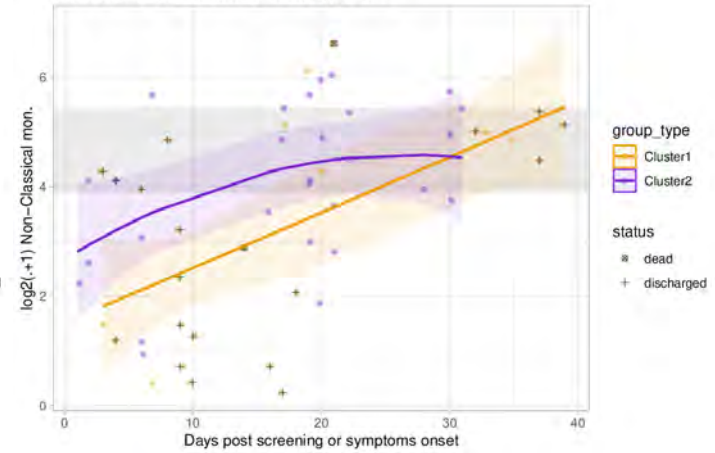

### Neutrophils

Likelihood ratio test: interaction  $p = 0.36$ , adj.  $p = 0.41$

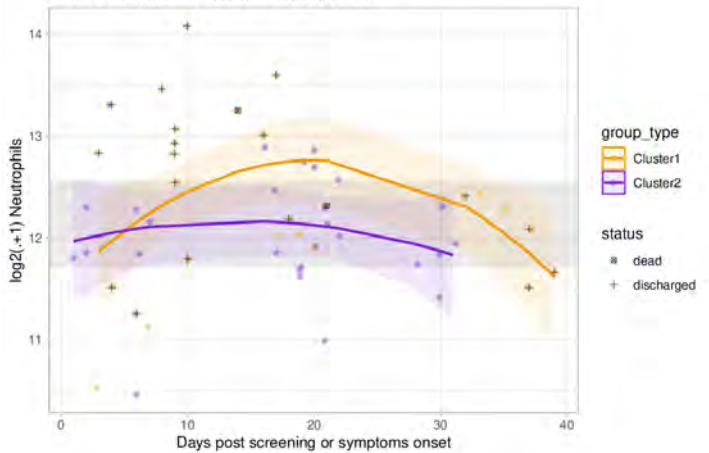

### CD66b- Neutrophils

Likelihood ratio test: interaction  $p = 0.36$ , adj.  $p = 0.41$

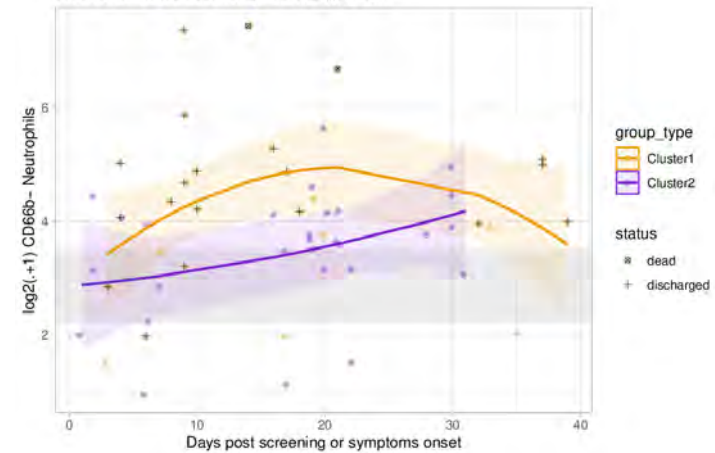



### Naive B

Likelihood ratio test: interaction  $p = 0.39$ , adj.  $p = 0.43$

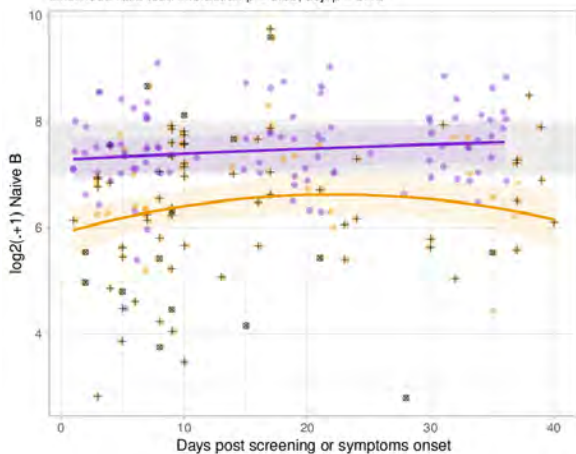

### Transitional B

Likelihood ratio test: interaction  $p = 0.017$ , adj.  $p = 0.034$  (\*)

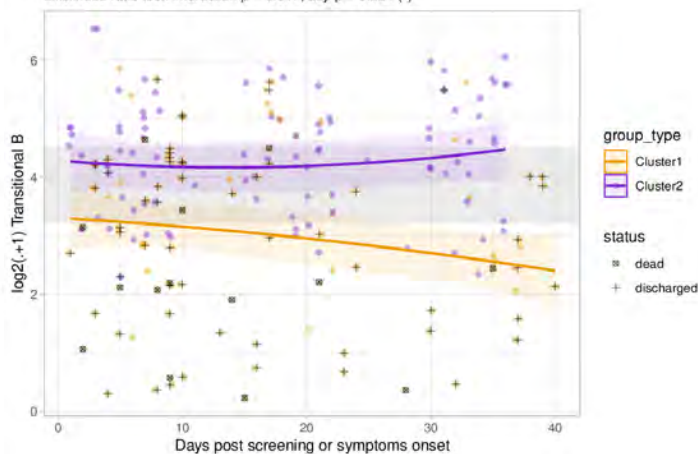

### Total Memory B

Likelihood ratio test: interaction  $p = 0.69$ , adj.  $p = 0.7$

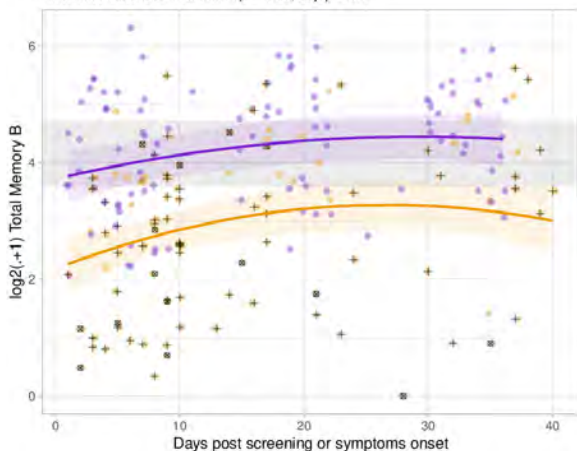

### Plasmablasts

Likelihood ratio test: interaction  $p = 0.027$ , adj.  $p = 0.048$  (\*)

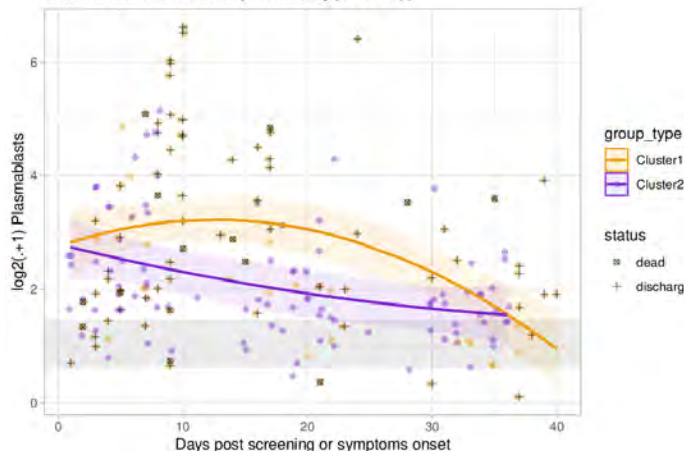

### pDCs

Likelihood ratio test: interaction  $p = 0.56$ , adj.  $p = 0.58$

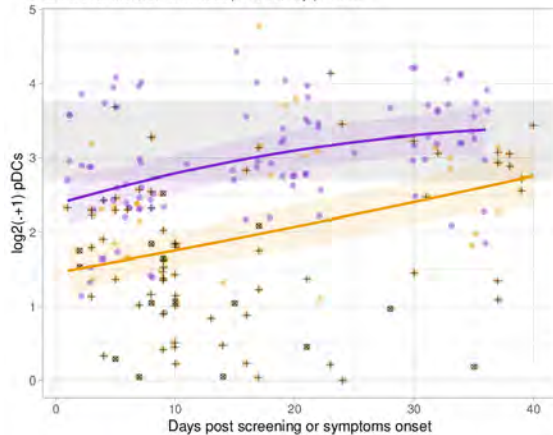

### Basophils

Likelihood ratio test: interaction  $p = 0.084$ , adj.  $p = 0.12$

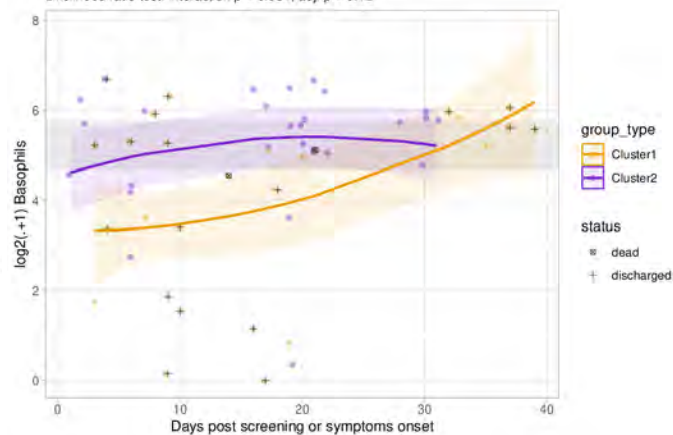

### Double neg. B

Likelihood ratio test: interaction  $p = 0.11$ , adj.  $p = 0.15$

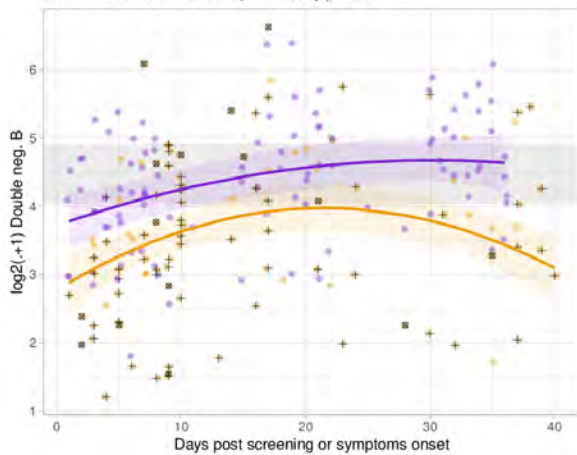

Supplement: Supplementary file [file media-6.zip]
